# Supplementary material for: Comparative Analysis of Mycoplasma gallisepticum vlhA Promoters
Source: Front Genet. 2018 Nov 21;9:569. doi: 10.3389/fgene.2018.00569 (PMC6258824; doi:10.3389/fgene.2018.00569)
Supplement: TABLE S2 — Data on vlhA genes, sequences of genes, their promoters and GAA repeats. [file Table_2.XLSX]

## Sheet: Table S1
Strain	RefSeq ID	Chromosome size (Mb)	GC content (%)	Number of predicted protein coding genes	Number of noncoding RNAs and pseudogenes
S6	NC_023030,2	1	31.4	701	113
F	NC_017503,1	1	31.5	722	88
NC06	NC_018411,1	0.9	31.6	711	66
NC08	NC_018413,1	0.9	31.6	706	66
NC95	NC_018407,1	1	31.6	727	61
NC96	NC_018408,1	1	31.6	745	62
NY01	NC_018409,1	1	31.6	727	67
Rhigh	NC_017502,1	1	31.5	729	93
Rlow	NC_004829,2	1	31.5	733	90
VA94	NC_018406,1	1	31.6	736	62
WI01	NC_018410,1	0.9	31.6	717	63
CA06	NC_018412,1	1	31.6	732	67

## Sheet: Table S2
Strain	vlhA start	vlhA end	vlhA strand	Orthologous group	GAA units number	Upstream (GAA)n flank	(GAA)n tract	Downstream (GAA)n flank	vlhA protein sequences
CA06	570932	573275	-	0	13	AATTGTAGATTTGGTTTTAATATAAATATCAACAAAACCTTTTGTTTTCC	GAAGAAGAAGAAGAAGAAGAAGAAGAAGAAGAAGAAGAA	GTTCTTAGGAGTTCTGTGGTCTGGGGTTGGTTTGATCAGCGAAAATAAAC	VKRKNILKFVSLLGIGSFVMLAAASCTQATTPTPNPNPKPTPNPNPPSGGMNGGNTNPGNGGGMDNSAKQLAAAKTEAKAVIDASAELSDSVKEALKRQVDATTTGPAARDLKTKAEALVSAVKALSGSVTAAKTLQAEEQYTNVSQDFKTTLEAKLTAATALLEDGTKLKNLDASGNLDTTKASLESSKTDLDAAVAAVKPELTFAKTKASAVKTASELRPLVNEAFLAELQKQANDLPKNDQSKADKLDSELKSLKASLTSLQDLVSKGLAMQVDYPQKYYDADNKEAFDAALLKASSVFPAFQWTAESIMVPAPTDGVLPNPRAWTKAREKSELVLQNFVMAPAQAAAPTPTEPAAAESASAIVRVANGEAASPDGAVSREAQTTPAPAPMADLAS…
CA06	802173	804810	-	0	8	AATTGTAGATTTGGTTTTAATATAAATATCAACAAAACCTTTTGTTTTCC	GAAGAAGAAGAAGAAGAAGAAGAA	GTTCTTAGGAGTTCTGTGGTCTGGGGTTGGTTTGATCAGCGAAAATAAAC	VKRKNILKFVSLLGIGSFVMLAAASCTQATTPTPNPNPKPTPNPNPPSGGMNGGNTNPGNGGGMDNSAKQLAAAKTEAKAVIDASAELSDSVKEALKRQVDATTTGPAARDLKTKAEALVSAVKALSGSVTAAKTLQAEEQYTNVSQDFKTTLEAKLTAATALLEDGTKLKNLDASGNLDTTKASLESSKTDLDAAVAAVKPELTFAKTKASAVKTASELRPLVNEAFLAELQKQANDLPKNDQSKADKLDSELKSLKASLTSLQDLVSKGLAMQVDYPQKYYDADNKEAFDAALLKASSVFPAFQWTAESIMVPAPTDGVLPNPRAWTKAREKSELVLQNFVMAPAQAAAPTPTEPAAAESASAIVRVANGEAASPDGAVSREAQTTPAPAPMADLAS…
F	248320	250951	+	0	10	AAAACATTTCTCTGAATTTGTTATAAAAATTATTAAAACTTTTTATTTTC	GAAGAAGAAGAAGAAGAAGAAGAAGAAGAA	GTTCTTAGGAGTTCTGGGGTTTGGGAATCCTGTGATCTGCGAAAATTAAG	VKRKNILKFVSLLGIGSFVMLAAASCTQATTPTPNPKPTPNPNPPSGGMNGGNTNPGNGGGMDNSAKQLAAAKTEAKAVIDASAELSDSVKEALKRQVDATTTGPAARDLKTKAEALVSAVKALSGSVTAAKTLQAEEQYTNVSQDFKTTLEAKLTAATALLEDGTKLKNLDASGNLDTTKASLESSKTDLDAAVAAVKPELTFAKTKASVVKTASELRPLVNEALLAELQKQANDLPKNDQSKADKLDSELKSLKASLTSLQDLVSKGLAMQVDYPQKYYDADNKDAFDAALLKASSVFPAFKWTAESIMVPDPTNGALPNPRAWTKARDKSEFKLQNFVMAPAQAAAPTPTEPAAAESASAIVRVANGEAASPDGAVSREAQTTPAPAPMADLASTV…
MC06	546943	549289	-	0	9	AATTGTAGATTTGGTTTTAATATAAATATCAACAAAACCTTTTGTTTTCC	GAAGAAGAAGAAGAAGAAGAAGAAGAA	GTTCTTAGGAGTTCTGTGGTCTGGGGTTGGTTTGATCAGCGAAAATAAAC	VKRKNILKFVSLLGIGSFVMLAAASCTQATTPTPNPNPKPTPNPNPPSGGMNGGNTNPGNGGGMDNSAKQLAAAKTEAKAVIDASAELSDSVKEALKRQVDATTTGPAARDLKTKAEALVSAVKALSGSVTAAKTLQAEEQYTNVSQDFKTTLEAKLTAAATALLEDGTKLKNLDASGNLDTTKASLESSKTDLDAAVAAVKPELTFAKTKASAVKTASELRPLVNEAFLAELQKQANDLPKNDQSKADKLDSELKSLKASLTSLQDLVSKGLAMQVDYPQKYYDADNKEAFDAALLKASSVFPAFQWTAESIMVPAPTDGVLPNPRAWTKAREKSELVLQNFVMAPAQAAAPTPTEPAAAESASAIVRVANGEAASPDGAVSREAQTTPAPAPMADLA…
MC06	777947	780290	-	0	8	AATTGTAGATTTGGTTTTAATATAAATATCAACAAAACCTTTTGTTTTCC	GAAGAAGAAGAAGAAGAAGAAGAA	GTTCTTAGGAGTTCTGTGGTCTGGGGTTGGTTTGATCAGCGAAAATAAAC	VKRKNILKFVSLLGIGSFVMLAAASCTQATTPTPNPNPKPTPNPNPPSGGMNGGNTNPGNGGGMDNSAKQLAAAKTEAKAVIDASAELSDSVKEALKRQVDATTTGPAARDLKTKAEALVSAVKALSGSVTAAKTLQAEEQYTNVSQDFKTTLEAKLTAATALLEDGTKLKNLDASGNLDTTKASLESSKTDLDAAVAAVKPELTFAKTKASAVKTASELRPLVNEAFLAELQKQANDLPKNDQSKADKLDSELKSLKASLTSLQDLVSKGLAMQVDYPQKYYDADNKEAFDAALLKASSVFPAFQWTAESIMVPAPTDGVLPNPRAWTKAREKSELVLQNFVMAPAQAAAPTPTEPAAAESASAIVRVANGEAASPDGAVSREAQTTPAPAPMADLAS…
NC08	542023	544366	-	0	10	AATTGTAGATTTGGTTTTAATATAAATATCAACAAAACCTTTTGTTTTCC	GAAGAAGAAGAAGAAGAAGAAGAAGAAGAA	GTTCTTAGGAGTTCTGTGGTCTGGGGTTGGTTTGATCAGCGAAAATAAAC	VKRKNILKFVSLLGIGSFVMLAAASCTQATTPTPNPNPKPTPNPNPPSGGMNGGNTNPGNGGGMDNSAKQLAAAKTEAKAVIDASAELSDSVKEALKRQVDATTTGPAARDLKTKAEALVSAVKALSGSVTAAKTLQAEEQYTNVSQDFKTTLEAKLTAATALLEDGTKLKNLDASGNLDTTKASLESSKTDLDAAVAAVKPELTFAKTKASAVKTASELRPLVNEAFLAELQKQANDLPKNDQSKADKLDSELKSLKASLTSLQDLVSKGLAMQVDYPQKYYDADNKEAFDAALLKASSVFPAFQWTAESIMVPAPTDGVLPNPRAWTKAREKSELVLQNFVMAPAQAAAPTPTEPAAAESASAIVRVANGEAASPDGAVSREAQTTPAPAPMADLAS…
NC95	547170	549807	-	0	8	AATTGTAGATTTGGTTTTAATATAAATATCAACAAAACCTTTTGTTTTCC	GAAGAAGAAGAAGAAGAAGAAGAA	GTTCTTAGGAGTTCTGTGGTCTGGGGTTGGTTTGATCAGCGAAAATAAAC	VKRKNILKFVSLLGIGSFVMLAAASCTQATTPTPNPNPKPTPNPNPPSGGMNGGNTNPGNGGGMDNSAKQLAAAKTEAKAVIDASAELSDSVKEALKRQVDATTTGPAARDLKTKAEALVSAVKALSGSVTAAKTLQAEEQYTNVSQDFKTTLEAKLTAATALLEDGTKLKNLDASGNLDTTKASLESSKTDLDAAVAAVKPELTFAKTKASAVKTASELRPLVNEAFLAELQKQANDLPKNDQSKADKLDSELKSLKASLTSLQDLVSKGLAMQVDYPQKYYDADNKEAFDAALLKASSVFPAFQWTAESIMVPAPTDGVLPNPRAWTKAREKSELVLQNFVMAPAQAAAPTPTEPAAAESASAIVRVANGEAASPDGAVSREAQTTPAPAPMADLAS…
NC95	778629	781266	-	0	8	AATTGTAGATTTGGTTTTAATATAAATATCAACAAAACCTTTTGTTTTCC	GAAGAAGAAGAAGAAGAAGAAGAA	GTTCTTAGGAGTTCTGTGGTCTGGGGTTGGTTTGATCAGCGAAAATAAAC	VKRKNILKFVSLLGIGSFVMLAAASCTQATTPTPNPNPKPTPNPNPPSGGMNGGNTNPGNGGGMDNSAKQLAAAKTEAKAVIDASAELSDSVKEALKRQVDATTTGPAARDLKTKAEALVSAVKALSGSVTAAKTLQAEEQYTNVSQDFKTTLEAKLTAATALLEDGTKLKNLDASGNLDTTKASLESSKTDLDAAVAAVKPELTFAKTKASAVKTASELRPLVNEAFLAELQKQANDLPKNDQSKADKLDSELKSLKASLTSLQDLVSKGLAMQVDYPQKYYDADNKEAFDAALLKASSVFPAFQWTAESIMVPAPTDGVLPNPRAWTKAREKSELVLQNFVMAPAQAAAPTPTEPAAAESASAIVRVANGEAASPDGAVSREAQTTPAPAPMADLAS…
NC96	576349	578986	-	0	12	AATTGTAGATTTGGTTTTAATATAAATATCAACAAAACCTTTTGTTTTCC	GAAGAAGAAGAAGAAGAAGAAGAAGAAGAAGAAGAA	GTTCTTAGGAGTTCTGTGGTCTGGGGTTGGTTTGATCAGCGAAAATAAAC	VKRKNILKFVSLLGIGSFVMLAAASCTQATTPTPNPNPKPTPNPNPPSGGMNGGNTNPGNGGGMDNSAKQLAAAKTEAKAVIDASAELSDSVKEALKRQVDATTTGPAARDLKTKAEALVSAVKALSGSVTAAKTLQAEEQYTNVSQDFKTTLEAKLTAATALLEDGTKLKNLDASGNLDTTKASLESSKTDLDAAVAAVKPELTFAKTKASAVKTASELRPLVNEAFLAELQKQANDLPKNDQSKADKLDSELKSLKASLTSLQDLVSKGLAMQVDYPQKYYDADNKEAFDAALLKASSVFPAFQWTAESIMVPAPTDGVLPNPRAWTKAREKSELVLQNFVMAPAQAAAPTPTEPAAAESASAIVRVANGEAASPDGAVSREAQTTPAPAPMADLAS…
NC96	811491	814128	-	0	5	AATTGTAGATTTGGTTTTAATATAAATATCAACAAAACCTTTTGTTTTCC	GAAGAAGAAGAAGAA	GTTCTTAGGAGTTCTGTGGTCTGGGGTTGGTTTGATCAGCGAAAATAAAC	VKRKNILKFVSLLGIGSFVMLAAASCTQATTPTPNPNPKPTPNPNPPSGGMNGGNTNPGNGGGMDNSAKQLAAAKTEAKAVIDASAELSDSVKEALKRQVDATTTGPAARDLKTKAEALVSAVKALSGSVTAAKTLQAEEQYTNVSQDFKTTLEAKLTAATALLEDGTKLKNLDASGNLDTTKASLESSKTDLDAAVAAVKPELTFAKTKASAVKTASELRPLVNEAFLAELQKQANDLPKNDQSKADKLDSELKSLKASLTSLQDLVSKGLAMQVDYPQKYYDADNKEAFDAALLKASSVFPAFQWTAESIMVPAPTDGVLPNPRAWTKAREKSELVLQNFVMAPAQAAAPTPTEPAAAESASAIVRVANGEAASPDGAVSREAQTTPAPAPMADLAS…
NY01	790729	792997	-	0	12	AATTGTAGATTTGGTTTTAATATAAATATCAACAAAACCTTTTGTTTTCC	GAAGAAGAAGAAGAAGAAGAAGAAGAAGAAGAAGAA	GTTCTTAGGAGTTCTGTGGTCTGGGGTTGGTTTGATCAGCGAAAATAAAC	VKRKNILKFVSLLGIGSFVMLAAASCTQATTPTPNPNPKPTPNPNPPSGGMNGGNTNPGNGGGMDNSAKQLAAAKTEAKAVIDASAELSDSVKEALKRQVDATTTGPAARDLKTKAEALVSAVKALSGSVTAAKTLQAEEQYTNVSQDFKTTLEAKLTAATALLEDGTKLKNLDASGNLDTTKASLESSKTDLDAAVAAVKPELTFAKTKASAVKTASELRPLVNEAFLAELQKQANDLPKNDQSKADKLDSELKSLKASLTSLQDLVSKGLAMQVDYPQKYYDADNKEAFDAALLKASSVFPAFQWTAESIMVPAPTDGVLPNPRAWTKAREKSELVLQNFVMAPAQAAAPTPTEPAAAESASAIVRVANGEAASPDGAVSREAQTTPAPAPMADLAS…
Rhigh	253052	255308	+	0	8	AAAACATTTCTCTGAATTTGTTATAAAAATTATTAAAACTTTTTATTTTC	GAAGAAGAAGAAGAAGAAGAAGAA	GTTCTTAGGAGTTCTGGGGTTTGGGAATCCTGTGATCTGCGAAAATTAAG	VKRKNILKFVSLLGIGSFVMLAAASCTSATTPTRNPEPKPDPMPNPPSGGMNGGNTNPGNGGGTDNAAQQLAAAKTEAKAVIDASAELSDSVKEALKRQVDATTTGPAARDLKTKAETLVSTVKALSESVTAAKAVKEDAQYNSFDPTLKTTLEEKYKTAVGFLTEDSKLKNLDASSNLDTTKASLESSKTDLDAAVAAVKPELTFAKTKASAVKTASELRPLVNEAFLAELQKQANDLPKNDQSKADKLDSELKSLKASLTSLQDLVSKGLAMQVDYPQKYYDADNKEAFDAALLKASSVFPAFQWTAESIMVPAPTDGALPNPRAWTKAREKSEFVLQNFVMAPAQAAAPTPTEPAAAESASVRVANGEAASPDGAASREAQRTPAPAPMADLASTV…
Rlow	253105	255361	+	0	8	AAAACATTTCTCTGAATTTGTTATAAAAATTATTAAAACTTTTTATTTTC	GAAGAAGAAGAAGAAGAAGAAGAA	GTTCTTAGGAGTTCTGGGGTTTGGGAATCCTGTGATCTGCGAAAATTAAG	VKRKNILKFVSLLGIGSFVMLAAASCTSATTPTRNPEPKPDPMPNPPSGGMNGGNTNPGNGGGTDNAAQQLAAAKTEAKAVIDASAELSDSVKEALKRQVDATTTGPAARDLKTKAETLVSTVKALSESVTAAKAVKEDAQYNSFDPTLKTTLEEKYKTAVGFLTEDSKLKNLDASSNLDTTKASLESSKTDLDAAVAAVKPELTFAKTKASAVKTASELRPLVNEAFLAELQKQANDLPKNDQSKADKLDSELKSLKASLTSLQDLVSKGLAMQVDYPQKYYDADNKEAFDAALLKASSVFPAFQWTAESIMVPAPTDGALPNPRAWTKAREKSEFVLQNFVMAPAQAAAPTPTEPAAAESASVRVANGEAASPDGAASREAQRTPAPAPMADLASTV…
S6	256524	259155	+	0	8	AAAACATTTCTCTGAATTTGTTATAAAAATTATTAAAACTTTTTATTTTC	GAAGAAGAAGAAGAAGAAGAAGAA	GTTCTTAGGAGTTCTGGGGTTTGGGAATCCTGTGATCTGCGAAAATTAAG	VKRKNILKFVSLLGIGSFVMLAAASCTQATTPTPNPKPTPNPNPPSGGMNGGNTNPGNGGGMDNSAKQLAAAKTEAKAVIDASAELSDSVKEALKRQVDATTTGPAARDLKTKAEALVSAVKALSGSVTAAKTLQAEEQYTNVSQDFKTTLEAKLTAATALLEDGTKLKNLDASGNLDTTKASLESSKTDLDAAVAAVKPELTFAKTKASVVKTASELRPLVNEALLAELQKQANDLPKNDQSKADKLDSELKSLKASLTSLQDLVSKGLAMQVDYPQKYYDADNKDAFDAALLKASSVFPAFKWTAESIMVPDPTNGALPNPRAWTKARDKSEFKLQNFVMAPAQAAAPTPTEPAAAESASAIVRVANGEAASPDGAVSREAQTTPAPAPMADLASTV…
VA94	557955	560592	-	0	12	AATTGTAGATTTGGTTTTAATATAAATATCAACAAAACCTTTTGTTTTCC	GAAGAAGAAGAAGAAGAAGAAGAAGAAGAAGAAGAA	GTTCTTAGGAGTTCTGTGGTCTGGGGTTGGTTTGATCAGCGAAAATAAAC	VKRKNILKFVSLLGIGSFVMLAAASCTQATTPTPNPNPKPTPNPNPPSGGMNGGNTNPGNGGGMDNSAKQLAAAKTEAKAVIDASAELSDSVKEALKRQVDATTTGPAARDLKTKAEALVSAVKALSGSVTAAKTLQAEEQYTNVSQDFKTTLEAKLTAATALLEDGTKLKNLDASGNLDTTKASLESSKTDLDAAVAAVKPELTFAKTKASAVKTASELRPLVNEAFLAELQKQANDLPKNDQSKADKLDSELKSLKASLTSLQDLVSKGLAMQVDYPQKYYDADNKEAFDAALLKASSVFPAFQWTAESIMVPAPTDGVLPNPRAWTKAREKSELVLQNFVMAPAQAAAPTPTEPAAAESASAIVRVANGEAASPDGAVSREAQTTPAPAPMADLAS…
VA94	789345	791982	-	0	5	AATTGTAGATTTGGTTTTAATATAAATATCAACAAAACCTTTTGTTTTCC	GAAGAAGAAGAAGAA	GTTCTTAGGAGTTCTGTGGTCTGGGGTTGGTTTGATCAGCGAAAATAAAC	VKRKNILKFVSLLGIGSFVMLAAASCTQATTPTPNPNPKPTPNPNPPSGGMNGGNTNPGNGGGMDNSAKQLAAAKTEAKAVIDASAELSDSVKEALKRQVDATTTGPAARDLKTKAEALVSAVKALSGSVTAAKTLQAEEQYTNVSQDFKTTLEAKLTAATALLEDGTKLKNLDASGNLDTTKASLESSKTDLDAAVAAVKPELTFAKTKASAVKTASELRPLVNEAFLAELQKQANDLPKNDQSKADKLDSELKSLKASLTSLQDLVSKGLAMQVDYPQKYYDADNKEAFDAALLKASSVFPAFQWTAESIMVPAPTDGVLPNPRAWTKAREKSELVLQNFVMAPAQAAAPTPTEPAAAESASAIVRVANGEAASPDGAVSREAQTTPAPAPMADLAS…
W101	538896	541239	-	0	12	AATTGTAGATTTGGTTTTAATATAAATATCAACAAAACCTTTTGTTTTCC	GAAGAAGAAGAAGAAGAAGAAGAAGAAGAAGAAGAA	GTTCTTAGGAGTTCTGTGGTCTGGGGTTGGTTTGATCAGCGAAAATAAAC	VKRKNILKFVSLLGIGSFVMLAAASCTQATTPTPNPNPKPTPNPNPPSGGMNGGNTNPGNGGGMDNSAKQLAAAKTEAKAVIDASAELSDSVKEALKRQVDATTTGPAARDLKTKAEALVSAVKALSGSVTAAKTLQAEEQYTNVSQDFKTTLEAKLTAATALLEDGTKLKNLDASGNLDTTKASLESSKTDLDAAVAAVKPELTFAKTKASAVKTASELRPLVNEAFLAELQKQANDLPKNDQSKADKLDSELKSLKASLTSLQDLVSKGLAMQVDYPQKYYDADNKEAFDAALLKASSVFPAFQWTAESIMVPAPTDGVLPNPRAWTKAREKSELVLQNFVMAPAQAAAPTPTEPAAAESASAIVRVANGEAASPDGAVSREAQTTPAPAPMADLAS…
F	800711	802754	-	1	9	GATCGTAGTTGTGGTTGAAGTATAAATATCAACAAAACCCTTTGTTTCTC	GAAGAAGAAGAAGAAGAAGAAGAAGAA	AAAGAAGTTCTTAGGAGTTCTGGGGTTTGGGGCTGGTCTGATCGACGAAA	VKRKNILKFVSLLGIGSFVMLAAASCTSATTPTPKPESKPNPAPKPDPMPNPPSGGMNGGDTNPGMDTAAQELANAKAALTTLTNSESEKVGLYVDYAKISAKLSATYTTAKNVLNNSASTTQNINAARTTLEAEIAAAAKAKNDFDAQHTSLVKAYNNLKETLKEEKTNLDSLANENYAAIRTNLNSLYKKANTIVTATLDPTTGNIPEVMSVTQANQDIANATSKLVAWKQNADNLANSFIKQSLVKNNLTGVDEANNQEQPGNYSFVGFSVDVNGAQNNNRPNWSFAERKIWASEKTPLATTTAEDATQQAAPLTDVSWIYSLNGAEAKYKLSFRYFGAEKTAYLYFPYKLVKTSDNVGLQYKLNGGDTKQINFVQTPASGSSDVAANEEETMASP…
Rhigh	260565	262587	+	1	10	ATAACTTGTGATGGTTTTAACTGTAAAAACTCATAAAATCTTTTGTTTTC	GAAGAAGAAGAAGAAGAAGAAGAAGAAGAA	GTTCTTAGAAGTTTTGGGGTTTGGGAATCCTGTGATCAGCGAAAATTAAG	VKRKNILKFVSLLGIGSFVMLAAASCTSATTPTPNPTPNPEPKPDPMPNPPSGGMNGGDTNPGGGQGMMDSAAQELANAKAALTTLTNSESEKVGLYVDYAKISAKLSAAYTTAKKVLNNSASTTQNINAARTTLEAEIAAAAKAKTDFDAQHASLVEAYNNLKETLKEEKTNLDSIANENYAAIRTNLNSLYEKANTIVTATLEPTTGNIPEVMSVTQANQDITNATSRLVAWKQNADNLANSFIKQSLVKNNLTGVDKANNQEQPGNYSFVGFSVDVNGAQNNNRPNWSFAERKVWASQNTPLATTPTEDATKQAAPLTDVSWIYSLNGAEAKYTLSFRYFGAEKTAYLYFPYKLVKTGDNVGLQYKLNGGDTKQINFVQTPASGPSDGAANEEETM…
Rhigh	274747	276769	+	1	9	ATAACTTGTGATGGTTTTAACTGTAAAAACTCATAAAATCTTTTGTTTTC	GAAGAAGAAGAAGAAGAAGAAGAAGAA	GTTCTTAGAAGTTTTGGGGTTTGGGAATCCTGTGATCAGCGAAAATTAAG	VKRKNILKFVSLLGIGSFVMLAAASCTSATTPTPNPTPNPEPKPDPMPNPPSGGMNGGDTNPGGGQGMMDSAAQELANAKAALTTLTNSESEKVGLYVDYAKISAKLSAAYTTAKKVLNNSASTTQNINAARTTLEAEIAAAAKAKTDFDAQHASLVEAYNNLKETLKEEKTNLDSIANENYAAIRTNLNSLYEKANTIVTATLEPTTGNIPEVMSVTQANQDITNATSRLVAWKQNADNLANSFIKQSLVKNNLTGVDKANNQEQPGNYSFVGFSVDVNGAQNNNRPNWSFAERKVWASQNTPLATTPTEDATKQAAPLTDVSWIYSLNGAEAKYTLSFRYFGAEKTAYLYFPYKLVKTGDNVGLQYKLNGGDTKQINFVQTPASGPSDGAANEEETM…
Rlow	260639	262661	+	1	11	ATAACTTGTGATGGTTTTAACTGTAAAAACTCATAAAATCTTTTGTTTTC	GAAGAAGAAGAAGAAGAAGAAGAAGAAGAAGAA	GTTCTTAGAAGTTTTGGGGTTTGGGAATCCTGTGATCAGCGAAAATTAAG	VKRKNILKFVSLLGIGSFVMLAAASCTSATTPTPNPTPNPEPKPDPMPNPPSGGMNGGDTNPGGGQGMMDSAAQELANAKAALTTLTNSESEKVGLYVDYAKISAKLSAAYTTAKKVLNNSASTTQNINAARTTLEAEIAAAAKAKTDFDAQHASLVEAYNNLKETLKEEKTNLDSIANENYAAIRTNLNSLYEKANTIVTATLEPTTGNIPEVMSVTQANQDITNATSRLVAWKQNADNLANSFIKQSLVKNNLTGVDKANNQEQPGNYSFVGFSVDVNGAQNNNRPNWSFAERKVWASQNTPLATTPTEDATKQAAPLTDVSWIYSLNGAEAKYTLSFRYFGAEKTAYLYFPYKLVKTGDNVGLQYKLNGGDTKQINFVQTPASGPSDGAANEEETM…
Rlow	274827	276849	+	1	11	ATAACTTGTGATGGTTTTAACTGTAAAAACTCATAAAATCTTTTGTTTTC	GAAGAAGAAGAAGAAGAAGAAGAAGAAGAAGAA	GTTCTTAGAAGTTTTGGGGTTTGGGAATCCTGTGATCAGCGAAAATTAAG	VKRKNILKFVSLLGIGSFVMLAAASCTSATTPTPNPTPNPEPKPDPMPNPPSGGMNGGDTNPGGGQGMMDSAAQELANAKAALTTLTNSESEKVGLYVDYAKISAKLSAAYTTAKKVLNNSASTTQNINAARTTLEAEIAAAAKAKTDFDAQHASLVEAYNNLKETLKEEKTNLDSIANENYAAIRTNLNSLYEKANTIVTATLEPTTGNIPEVMSVTQANQDITNATSRLVAWKQNADNLANSFIKQSLVKNNLTGVDKANNQEQPGNYSFVGFSVDVNGAQNNNRPNWSFAERKVWASQNTPLATTPTEDATKQAAPLTDVSWIYSLNGAEAKYTLSFRYFGAEKTAYLYFPYKLVKTGDNVGLQYKLNGGDTKQINFVQTPASGPSDGAANEEETM…
S6	261893	263936	+	1	4	ATAAATCATTTCTGAATTAACTGTAAAAACGAATGAAAGCTTTTGTTTTC	GAAGAAGAAGAA	GTTCTTAGGAGTTCTGGGGTTTGGGGCTGGTCTGATCGACGAAAATAAAC	VKRKNILKFVSLLGIGSFVMLAAASCTSATTPTPKPESKPNPAPKPDPMPNPPSGGMNGGDTNPGMDTAAQELANAKAALTTLTNSESEKVGLYVDYAKISAKLSATYTTAKNVLNNSASTTQNINAARTTLEAEIAAAAKAKNDFDAQHTSLVKAYNNLKETLKEEKTNLDSLANENYAAIRTNLNSLYKKANTIVTATLDPTTGNIPEVMSVTQANQDIANATSKLVAWKQNADNLANSFIKQSLVKNNLTGVDEANNQEQPGNYSFVGFSVDVNGAQNNNRPNWSFAERKIWASEKTPLATTTAEDATQQAAPLTDVSWIYSLNGAEAKYKLSFRYFGAEKTAYLYFPYKLVKTSDNVGLQYKLNGGDTKQINFVQTPASGSSDVAANEEETMASP…
MC06	271068	273087	+	2	13	ATTGAGTTGTTGTATTTAATATATAAAATAGCTAAAATCCTTTAGAAATC	GAAGAAGAAGAAGAAGAAGAAGAAGAAGAAGAAGAAGAA	GTTCTTAGAAGTTTAGGAGTTAGCGGATGCTCTGATCAGCGAAAATAAAC	VKRKNILKFVSLLGIGSFVMLAAASCTSATTPTPNPEPKPNPEPKPDPMPNPPSGGMNGGDTNPGMDTAAQELANAKAALTTLTNSESEKVGLYVDYAKISAKLSAAYTTAKNVLNNSASTTQNINAARTTLEAEIAAAAKAKTDFDAQHGSLVEAYNNLKETLKEEKINLDSLANENYAAIRTNLNSLYEKANTIVTATLDPATGNIPKVMSVTQANQDITNATSRLVAWKQNADNLANSFIKQSLVKNNLTGVDVANSQEQPANYSFVGFSVNVDTPNWNFAQRKVWASENTPLATTPTEDATKQAASLTDVS
Rhigh	495106	497206	+	2	7	AAAACATTTCTCTGAATTTGTTATAAAAATTAGTGAAACCTTTGATTTTC	GAAGAAGAAGAAGAAGAAGAA	ATTCTTAGGAGTTCTGGGGTTTGGGGTTGAGCTAATCAGCGAAAATAAAC	VKRKNILKFVSLLGIGSFVMLAAASCTTPVNPTPNPTPNPTPNPTPNPKPKPKPDPMPNPPSGGMNGGNTPTPNPNPHSGGMNGGDTNPGNGGGMDNSAQQLAAAKTALTTLLNGQTEKVGLYVDYAKISAKLSAAYTTAKNVLNNSASTTQNINAARTTLEAEIAAAAKAKTDFDAQHGPLVEAYNNLKETLKEEKTNLDSLANENYAAIRTNLNSLYEKANTIVTATLDPATGNIPQVMSVTQANQDITNATSKLVAWKQNADNLANSFIKQSLVKNNLTGVDEANNQEQPGNYSFVGFSVDVNGPQNNNRPNWSFAERKVWASENTPLATTPAEDATQQAAPLTDVSWIYSLNDAEAKYTLSFRYFGVEKTAYLYFPYKLVKTGDNVGLQYKLNGG…
Rlow	495168	497274	+	2	8	AAAACATTTCTCTGAATTTGTTATAAAAATTAGTGAAACCTTTGATTTTC	GAAGAAGAAGAAGAAGAAGAAGAA	ATTCTTAGGAGTTCTGGGGTTTGGGGTTGAGCTAATCAGCGAAAATAAAC	VKRKNILKFVSLLGIGSFVMLAAASCTTPVNPTPNPTPNPTPNPTPNPTPNPKPKPDPMPNPPSGGMNGGNTPTPNPNPHSGGMNGGDTNPGNGGGMDNSAQQLAAAKTALTTLLNGQTEKVGLYVDYAKISAKLSAAYTTAKNVLNNSASTTQNINAARTTLEAEIAAAAKAKTDFDAQHGPLVEAYNNLKETLKEEKTNLDSLANENYAAIRTNLNSLYEKANTIVTATLDPATGNIPQVMSVTQANQDITNATSKLVAWKQNADNLANSFIKQSLVKNNLTGVDEANNQEQPGNYSFVGFSVDVNGPQNNNRPNWSFAERKVWASENTPLATTPAEDATQQAAPLTDVSWIYSLNDAEAKYTLSFRYFGVEKTAYLYFPYKLVKTGDNVGLQYKLN…
CA06	573598	575659	-	3	6	AAATGTAGATCTGGTTTAGATATAAATATCTACAGAATCCTTTTATTTTC	GAAGAAGAAGAAGAAGAA	GTTCTTAGAAGTTTAGGGGTATGGGGTTGGGCAAGTGAGCGAAAATAAAC	VKRKNILKFVSLLGIDSFVMLAAASCTSATTPTPNPEPKPNPNPEPKPDPMPNPPSGGMNGGNANPGGGQGMMDSAAQELTAARTALTSLLASKNANVEMYSDYAKIKNDLTAAYTTALTASQNQAGTLEQVKNATSTLQTAIDKAASDKNDFNNQNADLVSAYTSLKDAVKSETTNLEGLSHANYIAIKDNLTTYYGKAKNILTATLYPASGEIPKVDAVKVVNNFITNANSNIEQWKNNANMLSDSFLKKTLDKQQLTSNAELQQPANYSFVGYSKDITDRKYNFAKRIVWKPQEGRSSTYVPLENQGDLTDVSWIYSLAGNETKYSFTFANYGTTTGYLYFPYKSVKSSDNVALQYKLNDASPVSIDFNNSAISPSQESASDADGSEMATTADDSS…
CA06	805118	807179	-	3	6	AAATGTAGATCTGGTTTAGATATAAATATCTACAGAATCCTTTTATTTTC	GAAGAAGAAGAAGAAGAA	GTTCTTAGAAGTTTAGGGGTATGGGGTTGGGCAAGTGAGCGAAAATAAAC	VKRKNILKFVSLLGIDSFVMLAAASCTSATTPTPNPEPKPNPNPEPKPDPMPNPPSGGMNGGNANPGGGQGMMDSAAQELTAARTALTSLLASKNANVEMYSDYAKIKNDLTAAYTTALTASQNQAGTLEQVKNATSTLQTAIDKAASDKNDFNNQNADLVSAYTSLKDAVKSETTNLEGLSHANYIAIKDNLTTYYGKAKNILTATLYPASGEIPKVDAVKVVNNFITNANSNIEQWKNNANMLSDSFLKKTLDKQQLTSNAELQQPANYSFVGYSKDITDRKYNFAKRIVWKPQEGRSSTYVPLENQGDLTDVSWIYSLAGNETKYSFTFANYGTTTGYLYFPYKSVKSSDNVALQYKLNDASPVSIDFNNSAISPSQESASDADGSEMATTADDSS…
F	798303	800352	-	3	9	GATCGTAGTTGTGGTTGAAGTATAAATATCAACAAAACCCTTTGTTTCTC	GAAGAAGAAGAAGAAGAAGAAGAAGAA	GTTCTTAGGAGTTCTGGAGTTTTGAGCTGGTTTGATCGACGAAAATAAAC	VKRKNILKFVSLLGIGSFVMLAAASCTSATTQTPNPEPKPNPGGGDTNNPPSGGMNGVDTNPGGGQGMMDSAAQELTAARTALTSLLASKNANVQMYSDYAKIKNDLTAAYTTAETASQNQAATLEQVKSATSTLQTAIDKAASDKNDFNNQNADLVSAYTSLKDAVKSETTNLEGLSDANYTAIKDNLTTYYGKAKNILTATLYPESGEIPKVDAVKVVNNFITNANSNIEQWKNNANMLSDSFLRKTLDKQQLTSNAELQQPANYSFVGYSKDITDHKYNFAKRIVWKPKMGSGSTYEPLENQGDLTDVSWIYSLAGNETKYSFTFANYGTTTGYLYFPYKSVKSSDNVALQYKLNGASPVSIDFNNSAISPSQESASDADGSEMATRTDDNSPESQ…
MC06	549600	551661	-	3	11	AAATGTAGATCTGGTTTAGATATAAATATCTACAGAATCCTTTTATTTTC	GAAGAAGAAGAAGAAGAAGAAGAAGAAGAAGAA	GTTCTTAGAAGTTTAGGGGTATGGGGTTGGGCAAGTGAGCGAAAATAAAC	VKRKNILKFVSLLGIDSFVMLAAASCTSATTPTPNPEPKPTPNPEPKPDPMPNPPSGGMNGGNANPGGGQGMMDSAAQELTAARTALTSLLASKNANVEMYSDYAKIKNDLTAAYTTALTASQNQAGTLEQVKNATSTLQTAIDKAASDKNDFNNQNADLVSAYTSLKDAVKSETTNLEGLSHANYIAIKDNLTTYYGKAKNILTATLYPASGEIPKVDAVKVVNNFITNANSNIEQWKNNANMLSDSFLKKTLDKQQLTSNAKLQQPANYSFVGYSKDITDRKYNFAKRIVWKPQEGRSSTYVPLENQGDLTDVSWIYSLAGNETKYSFTFANYGTTTGYLYFPYKSVKSSDNVALQYKLNDASPVSIDFNNSAISPSQESASDADGSEMATTADDSS…
MC06	780598	782659	-	3	9	AAATGTAGATCTGGTTTAGATATAAATATCTACAGAATCCTTTTATTTTC	GAAGAAGAAGAAGAAGAAGAAGAAGAA	GTTCTTAGAAGTTTAGGGGTATGGGGTTGGGCAAGTGAGCGAAAATAAAC	VKRKNILKFVSLLGIDSFVMLAAASCTSATTPTPNPEPKPTPNPEPKPDPMPNPPSGGMNGGNANPGGGQGMMDSAAQELTAARTALTSLLASKNANVEMYSDYAKIKNDLTAAYTTALTASQNQAGTLEQVKNATSTLQTAIDKAASDKNDFNNQNADLVSAYTSLKDAVKSETTNLEGLSHANYIAIKDNLTTYYGKAKNILTATLYPASGEIPKVDAVKVVNNFITNANSNIEQWKNNANMLSDSFLKKTLDKQQLTSNAELQQPANYSFVGYSKDITDRKYNFAKRIVWKPQEGRSSTYVPLENQGDLTDVSWIYSLAGNETKYSFTFANYGTTTGYLYFPYKSVKSSDNVALQYKLNDASPVSIDFNNSAISPSQESASDADGSEMATTADDSS…
NC08	544680	546741	-	3	5	AAATGTAGATCTGGTTTAGATATAAATATCTACAGAATCCTTTTATTTTC	GAAGAAGAAGAAGAA	GTTCTTAGAAGTTTAGGGGTATGGGGTTGGGCAAGTGAGCGAAAATAAAC	VKRKNILKFVSLLGIDSFVMLAAASCTSATTPTPNPEPKPNPNPEPKPDPMPNPPSGGMNGGNANPGGGQGMMDSAAQELTAARTALTSLLASKNANVEMYSDYAKIKNDLTAAYTTALTASQNQAGTLEQVKNATSTLQTAIDKAASDKNDFNNQNADLVSAYTSLKDAVKSETTNLEGLSHANYIAIKDNLTTYYGKAKNILTATLYPASGEIPKVDAVKVVNNFITNANSNIEQWKNNANMLSDSFLKKTLDKQQLTSNAELQQPANYSFVGYSKDITDRKYNFAKRIVWKPQEGRSSTYVPLENQGDLTDVSWIYSLAGNETKYSFTFANYGTTTGYLYFPYKSVKSSDNVALQYKLNDASPVSIDFNNSAISPSQESASDADGSEMATTADDSS…
NC95	550115	552176	-	3	9	AAATGTAGATCTGGTTTAGATATAAATATCTACAGAATCCTTTTATTTTC	GAAGAAGAAGAAGAAGAAGAAGAAGAA	GTTCTTAGAAGTTTAGGGGTATGGGGTTGGGCAAGTGAGCGAAAATAAAC	VKRKNILKFVSLLGIDSFVMLAAASCTSATTPTPNPEPKPNPNPEPKPDPMPNPPSGGMNGGNANPGGGQGMMDSAAQELTAARTALTSLLASKNANVEMYSDYAKIKNDLTAAYTTALTASQNQAGTLEQVKNATSTLQTAIDKAASDKNDFNNQNADLVSAYTSLKDAVKSETTNLEGLSHANYIAIKDNLTTYYGKAKNILTATLYPASGEIPKVDAVKVVNNFITNANSNIEQWKNNANMLSDSFLKKTLDKQQLTSNAELQQPANYSFVGYSKDITDRKYNFAKRIVWKPQEGRSSTYVPLENQGDLTDVSWIYSLAGNETKYSFTFANYGTTTGYLYFPYKSVKSSDNVALQYKLNDASPVSIDFNNSAISPSQESASDADGSEMATTADDSS…
NC95	781574	783635	-	3	6	AAATGTAGATCTGGTTTAGATATAAATATCTACAGAATCCTTTTATTTTC	GAAGAAGAAGAAGAAGAA	GTTCTTAGAAGTTTAGGGGTATGGGGTTGGGCAAGTGAGCGAAAATAAAC	VKRKNILKFVSLLGIDSFVMLAAASCTSATTPTPNPEPKPNPNPEPKPDPMPNPPSGGMNGGNANPGGGQGMMDSAAQELTAARTALTSLLASKNANVEMYSDYAKIKNDLTAAYTTALTASQNQAGTLEQVKNATSTLQTAIDKAASDKNDFNNQNADLVSAYTSLKDAVKSETTNLEGLSHANYIAIKDNLTTYYGKAKNILTATLYPASGEIPKVDAVKVVNNFITNANSNIEQWKNNANMLSDSFLKKTLDKQQLTSNAELQQPANYSFVGYSKDITDRKYNFAKRIVWKPQEGRSSTYVPLENQGDLTDVSWIYSLAGNETKYSFTFANYGTTTGYLYFPYKSVKSSDNVALQYKLNDASPVSIDFNNSAISPSQESASDADGSEMATTADDSS…
NC96	579306	581367	-	3	8	AAATGTAGATCTGGTTTAGATATAAATATCTACAGAATCCTTTTATTTTC	GAAGAAGAAGAAGAAGAAGAAGAA	GTTCTTAGAAGTTTAGGGGTATGGGGTTGGGCAAGTGAGCGAAAATAAAC	VKRKNILKFVSLLGIDSFVMLAAASCTSATTPTPNPEPKPNPNPEPKPDPMPNPPSGGMNGGNANPGGGQGMMDSAAQELTAARTALTSLLASKNANVEMYSDYAKIKNDLTAAYTTALTASQNQAGTLEQVKNATSTLQTAIDKAASDKNDFNNQNADLVSAYTSLKDAVKSETTNLEGLSHANYIAIKDNLTTYYGKAKNILTATLYPASGEIPKVDAVKVVNNFITNANSNIEQWKNNANMLSDSFLKKTLDKQQLTSNAELQQPANYSFVGYSKDITDRKYNFAKRIVWKPQEGRSSTYVPLENQGDLTDVSWIYSLAGNETKYSFTFANYGTTTGYLYFPYKSVKSSDNVALQYKLNDASPVSIDFNNSAISPSQESASDADGSEMATTADDSS…
NC96	814427	816488	-	3	6	AAATGTAGATCTGGTTTAGATATAAATATCTACAGAATCCTTTTATTTTC	GAAGAAGAAGAAGAAGAA	GTTCTTAGAAGTTTAGGGGTATGGGGTTGGGCAAGTGAGCGAAAATAAAC	VKRKNILKFVSLLGIDSFVMLAAASCTSATTPTPNPEPKPNPNPEPKPDPMPNPPSGGMNGGNANPGGGQGMMDSAAQELTAARTALTSLLASKNANVEMYSDYAKIKNDLTAAYTTALTASQNQAGTLEQVKNATSTLQTAIDKAASDKNDFNNQNADLVSAYTSLKDAVKSETTNLEGLSHANYIAIKDNLTTYYGKAKNILTATLYPASGEIPKVDAVKVVNNFITNANSNIEQWKNNANMLSDSFLKKTLDKQQLTSNAELQQPANYSFVGYSKDITDRKYNFAKRIVWKPQEGRSSTYVPLENQGDLTDVSWIYSLAGNETKYSFTFANYGTTTGYLYFPYKSVKSSDNVALQYKLNDASPVSIDFNNSAISPSQESASDADGSEMATTADDSS…
NY01	793317	795378	-	3	5	AAATGTAGATCTGGTTTAGATATAAATATCTACAGAATCCTTTTATTTTC	GAAGAAGAAGAAGAA	GTTCTTAGAAGTTTAGGGGTATGGGGTTGGGCAAGTGAGCGAAAATAAAC	VKRKNILKFVSLLGIDSFVMLAAASCTSATTPTPNPEPKPNPNPEPKPDPMPNPPSGGMNGGNANPGGGQGMMDSAAQELTAARTALTSLLASKNANVEMYSDYAKIKNDLTAAYTTALTASQNQAGTLEQVKNATSTLQTAIDKAASDKNDFNNQNADLVSAYTSLKDAVKSETTNLEGLSHANYIAIKDNLTTYYGKAKNILTATLYPASGEIPKVDAVKVVNNFITNANSNIEQWKNNANMLSDSFLKKTLDKQQLTSNAELQQPANYSFVGYSKDITDRKYNFAKRIVWKPQEGRSSTYVPLENQGDLTDVSWIYSLAGNETKYSFTFANYGTTTGYLYFPYKSVKSSDNVALQYKLNDASPVSIDFNNSAISPSQESASDADGSEMATTADDSS…
Rhigh	835651	837730	-	3	12	TGTAGATCTGGTTTAGATATAAATATTTATAGAATTCTTTTATTTTCTAA	GAAGAAGAAGAAGAAGAAGAAGAAGAAGAAGAAGAA	GTTCTTAGAAGTTTAGAAGCTAGGGGTTGGTTTGATCAGCGAAAATAAAC	VKRKNILKFLSLLGMGSFVMLAAASCTTPVNPTPNPKPTPNPEPKPHPMPNPPSGGMNGGDTNPGNGGGMMGDNPNPGNTTPEQQLATARKTLTDLIGTENTNVALYADYAKIQSTLSTAYMTAKTASENTNATLENLRSASTTLQTAIDKAVSDKNDFNNQNADLVSAYTSLKDAVKSETTNLEGLSDANYTAIKDNLTTYYGKAKNILTATLYPESGEIPKVDAVKVVNNFITNANSNIEQWKNNANMLSDSFLKKTLDKEQLTSNAELQQPANYSFVAYNQDITNPTYNFAKRVVWKPQEGRSSTYVPLENQGDLTDVSWIYSLAGNETKYSFTFANYGTTTGYLYFPYKSVKSSDNVALQYKLNGASPVSIDFNNSAISPSQESASDADGSEVAT…
Rlow	835839	837918	-	3	12	TGTAGATCTGGTTTAGATATAAATATTTATAGAATTCTTTTATTTTCTAA	GAAGAAGAAGAAGAAGAAGAAGAAGAAGAAGAAGAA	GTTCTTAGAAGTTTAGAAGCTAGGGGTTGGTTTGATCAGCGAAAATAAAC	VKRKNILKFLSLLGMGSFVMLAAASCTTPVNPTPNPKPTPNPEPKPHPMPNPPSGGMNGGDTNPGNGGGMMGDNPNPGNTTPEQQLATARKTLTDLIGTENTNVALYADYAKIQSTLSTAYMTAKTASENTNATLENLRSASTTLQTAIDKAVSDKNDFNNQNADLVSAYTSLKDAVKSETTNLEGLSDANYTAIKDNLTTYYGKAKNILTATLYPESGEIPKVDAVKVVNNFITNANSNIEQWKNNANMLSDSFLKKTLDKEQLTSNAELQQPANYSFVAYNQDITNPTYNFAKRVVWKPQEGRSSTYVPLENQGDLTDVSWIYSLAGNETKYSFTFANYGTTTGYLYFPYKSVKSSDNVALQYKLNGASPVSIDFNNSAISPSQESASDADGSEVAT…
S6	264317	266366	+	3	16	GATCGTAGTTGTGGTTGAAGTATAAATATCAACAAAACCCTTTGTTTCTC	GAAGAAGAAGAAGAAGAAGAAGAAGAAGAAGAAGAAGAAGAAGAAGAA	GTTCTTAGGAGTTCTGGAGTTTTGAGCTGGTTTGATCGACGAAAATAAAC	VKRKNILKFVSLLGIGSFVMLAAASCTSATTQTPNPEPKPNPGGGDTNNPPSGGMNGVDTNPGGGQGMMDSAAQELTAARTALTSLLASKNANVQMYSDYAKIKNDLTAAYTTAETASQNQAATLEQVKSATSTLQTAIDKAASDKNDFNNQNADLVSAYTSLKDAVKSETTNLEGLSDANYTAIKDNLTTYYGKAKNILTATLYPESGEIPKVDAVKVVNNFITNANSNIEQWKNNANMLSDSFLRKTLDKQQLTSNAELQQPANYSFVGYSKDITDHKYNFAKRIVWKPKMGSGSTYEPLENQGDLTDVSWIYSLAGNETKYSFTFANYGTTTGYLYFPYKSVKSSDNVALQYKLNGASPVSIDFNNSAISPSQESASDADGSEMATRTDDNSPESQ…
VA94	560912	562973	-	3	11	AAATGTAGATCTGGTTTAGATATAAATATCTACAGAATCCTTTTATTTTC	GAAGAAGAAGAAGAAGAAGAAGAAGAAGAAGAA	GTTCTTAGAAGTTTAGGGGTATGGGGTTGGGCAAGTGAGCGAAAATAAAC	VKRKNILKFVSLLGIDSFVMLAAASCTSATTPTPNPEPKPNPNPEPKPDPMPNPPSGGMNGGNANPGGGQGMMDSAAQELTAARTALTSLLASKNANVEMYSDYAKIKNDLTAAYTTALTASQNQAGTLEQVKNATSTLQTAIDKAASDKNDFNNQNADLVSAYTSLKDAVKSETTNLEGLSHANYIAIKDNLTTYYGKAKNILTATLYPASGEIPKVDAVKVVNNFITNANSNIEQWKNNANMLSDSFLKKTLDKQQLTSNAELQQPANYSFVGYSKDITDRKYNFAKRIVWKPQEGRSSTYVPLENQGDLTDVSWIYSLAGNETKYSFTFANYGTTTGYLYFPYKSVKSSDNVALQYKLNDASPVSIDFNNSAISPSQESASDADGSEMATTADDSS…
VA94	792281	794342	-	3	7	AAATGTAGATCTGGTTTAGATATAAATATCTACAGAATCCTTTTATTTTC	GAAGAAGAAGAAGAAGAAGAA	GTTCTTAGAAGTTTAGGGGTATGGGGTTGGGCAAGTGAGCGAAAATAAAC	VKRKNILKFVSLLGIDSFVMLAAASCTSATTPTPNPEPKPNPNPEPKPDPMPNPPSGGMNGGNANPGGGQGMMDSAAQELTAARTALTSLLASKNANVEMYSDYAKIKNDLTAAYTTALTASQNQAGTLEQVKNATSTLQTAIDKAASDKNDFNNQNADLVSAYTSLKDAVKSETTNLEGLSHANYIAIKDNLTTYYGKAKNILTATLYPASGEIPKVDAVKVVNNFITNANSNIEQWKNNANMLSDSFLKKTLDKQQLTSNAELQQPANYSFVGYSKDITDRKYNFAKRIVWKPQEGRSSTYVPLENQGDLTDVSWIYSLAGNETKYSFTFANYGTTTGYLYFPYKSVKSSDNVALQYKLNDASPVSIDFNNSAISPSQESASDADGSEMATTADDSS…
W101	541559	543620	-	3	10	GTAAATTATTTCTGAATTAACTATAAAAACTCACAAAATCTTTTGTTTTC	GAAGAAGAAGAAGAAGAAGAAGAAGAAGAA	GTTCTTAGAAGTTTAGGGGTATGGGGTTGGGCAAGTGAGCGAAAATAAAC	VKRKNILKFVSLLGIDSFVMLAAASCTSATTPTPNPEPKPNPNPEPKPDPMPNPPSGGMNGGNANPGGGQGMMDSAAQELTAARTALTSLLASKNANVEMYSDYAKIKNDLTAAYTTALTASQNQAGTLEQVKNATSTLQTAIDKAASDKNDFNNQNADLVSAYTSLKDAVKSETTNLEGLSHANYIAIKDNLTTYYGKAKNILTATLYPASGEIPKVDAVKVVNNFITNANSNIEQWKNNANMLSDSFLKKTLDKQQLTSNAELQQPANYSFVGYSKDITDRKYNFAKRIVWKPQEGRSSTYVPLENQGDLTDVSWIYSLAGNETKYSFTFANYGTTTGYLYFPYKSVKSSDNVALQYKLNDASPVSIDFNNSAISPSQESASDADGSEMATTADDSS…
CA06	260616	262695	+	4	9	ATTGAGTTGTTGTATTTAATATATAAAATAGCTAAAATCCTTTAAAAATC	GAAGAAGAAGAAGAAGAAGAAGAAGAA	GTTCTTAGAAGTTTAGGAGTTAGCGACTACTCTGATCGGCGAAAATAAAC	VKRKNILKFVSLLGIGSFVMLAAASCTTATTPTPNPEPKPKPNPEPKPNPNPEPKPDPMPNPPSNGGGMNGVDTNPGNGGGMDNAAQQLAAVRTALTTLINSRTQNTELYVDYAKIQDTLVKAYDAAKAVLDNTASTTQNINQAKTTLETAINAAVKARRDFDAANDPLVTAYNALKETLKNEETVLGGLTDSNFATIKTNLTALYQSGKDFVKATLDPVSGNAPQSADITKADKDITDAVSKLETWKTNATFLATNFLKKVLVKTNLTNSSTDNNQEQPGNYSFVGYSVNATNNDEIPNWNFAQRKVWTSDNGRTSLVSSTSENSSPLTEVSWIYSLLGAGTKYSLTFNYYGPSTGYLYFPYKLVKEGDENNVALQYTLNGGSAQEVNFAPTVKTSVS…
F	795960	797976	-	4	14	AATTGTAGATTTGGTTTTAATATAAATATCAACAAAACCTTTTGTTTTCC	GAAGAAGAAGAAGAAGAAGAAGAAGAAGAAGAAGAAGAAGAA	GTTCTTAGGAGTTCTGTGGTCTGGGGTTGGTTTGATCAGCGAAAATAAAC	VKRKNILKFVSLLGIGSFVMLAAASCTSATTPTPNPEPKPDPMPNPPSGDMNGGDTNPGNDGGMENSAQQLAAAKKELSDLLATQSSNLAKYADYTNIQNTLTAAYTTAKSTSDNTSVTLEQVKSATSTLQAAIDTAASSKTSFDEKNPELIKAYYALKETLKNEETVLSGLTDSNFATIKTNLTALYQSGKDFVKATLDPVSGNAPQIADITKADKDIADAVSKLETWKTNANTLATSFVKEVLVKNKLTGIDTTNNREQPGNYSFVGYSVNATNNNEIPNWNFAQRKVWTSDNGRTSLISSTSDNSSTLTEVSWIYSLSGAGTKYSLTFNYYGPSTGYLYFPYKLVKEGDENNVALQYTLNSGSAQEVNFAPTVKTSVSADSSGDSNNQTESAAETM…
MC06	261060	263139	+	4	10	ATTGAGTTGTTGTATTTAATATATAAAATAGCTAAAATCCTTTAAAAATC	GAAGAAGAAGAAGAAGAAGAAGAAGAAGAA	GTTCTTAGAAGTTTAGGAGTTAGCGACTACTCTGATCGGCGAAAATAAAC	VKRKNILKFVSLLGIGSFVMLAAASCTTATTPTPNPEPKPKPNPEPKPNPNPEPKPDPMPNPPSNGGGMNGVDTNPGNGGGMDNAAQQLAAVRTALTTLINSRTQNTELYVDYAKIQDTLVKAYDAAKAVLDNTASTTQNINQAKTTLETAINAAVKARRDFDAANDPLVTAYNALKETLKNEETVLGGLTDSNFATIKTNLTALYQSGKDFVKATLDPVSGNAPQSADITKADKDITDAVSKLETWKTNATFLATNFLKKVLVKTNLTNSSTDNNQEQPGNYSFVGYSVNATNNDEIPNWNFAQRKVWTSDNGRTSLVSSTSENSFPLTEVSWIYSLLGAGTKYSLTFNYYGPSTGYLYFPYKLVKEGDENNVALQYTLNGGSAQEVNFAPTVKTSVS…
NC08	261052	263131	+	4	8	ATTGAGTTGTTGTATTTAATATATAAAATAGCTAAAATCCTTTAAAAATC	GAAGAAGAAGAAGAAGAAGAAGAA	GTTCTTAGAAGTTTAGGAGTTAGCGACTACTCTGATCGGCGAAAATAAAC	VKRKNILKFVSLLGIGSFVMLAAASCTTATTPTPNPEPKPKPNPEPKPNPNPEPKPDPMPNPPSNGGGMNGVDTNPGNGGGMDNAAQQLAAVRTALTTLINSRTQNTELYVDYAKIQDTLVKAYDAAKAVLDNTASTTQNINQAKTTLETAINAAVKARRDFDAANDPLVTAYNALKETLKNEETVLGGLTDSNFATIKTNLTALYQSGKDFVKATLDPVSGNAPQSADITKADKDITDAVSKLETWKTNATFLATNFLKKVLVKTNLTNSSTDNNQEQPGNYSFVGYSVNATNNDEIPNWNFAQRKVWTSDNGRTSLVSSTSENSSPLTEVSWIYSLLGAGTKYSLTFNYYGPSTGYLYFPYKLVKEGDENNVALQYTLNGGSAQEVNFAPTVKTSVS…
NC95	266035	268114	+	4	8	ATTGAGTTGTTGTATTTAATATATAAAATAGCTAAAATCCTTTAAAAATC	GAAGAAGAAGAAGAAGAAGAAGAA	GTTCTTAGAAGTTTAGGAGTTAGCGACTACTCTGATCGGCGAAAATAAAC	VKRKNILKFVSLLGIGSFVMLAAASCTTATTPTPNPEPKPKPNPEPKPNPNPEPKPDPMPNPPSNGGGMNGVDTNPGNGGGMDNAAQQLAAVRTALTTLINSRTQNTELYVDYAKIQDTLVKAYDAAKAVLDNTASTTQNINQAKTTLETAINAAVKARRDFDAANDPLVTAYNALKETLKNEETVLGGLTDSNFATIKTNLTALYQSGKDFVKATLDPVSGNAPQSADITKADKDITDAVSKLETWKTNATFLATNFLKKVLVKTNLTNSSTDNNQEQPGNYSFVGYSVNATNNDEIPNWNFAQRKVWTSDNGRTSLVSSTSENSSPLTEVSWIYSLLGAGTKYSLTFNYYGPSTGYLYFPYKLVKEGDENNVALQYTLNGGSAQEVNFAPTVKTSVS…
NC96	266025	268104	+	4	8	ATTGAGTTGTTGTATTTAATATATAAAATAGCTAAAATCCTTTAAAAATC	GAAGAAGAAGAAGAAGAAGAAGAA	GTTCTTAGAAGTTTAGGAGTTAGCGACTACTCTGATCGGCGAAAATAAAC	VKRKNILKFVSLLGIGSFVMLAAASCTTATTPTPNPEPKPKPNPEPKPNPNPEPKPDPMPNPPSNGGGMNGVDTNPGNGGGMDNAAQQLAAVRTALTTLINSRTQNTELYVDYAKIQDTLVKAYDAAKAVLDNTASTTQNINQAKTTLETAINAAVKARRDFDAANDPLVTAYNALKETLKNEETVLGGLTDSNFATIKTNLTALYQSGKDFVKATLDPVSGNAPQSADITKADKDITDAVSKLETWKTNATFLATNFLKKVLVKTNLTNSSTDNNQEQPGNYSFVGYSVNATNNDEIPNWNFAQRKVWTSDNGRTSLVSSTSENSSPLTEVSWIYSLLGAGTKYSLTFNYYGPSTGYLYFPYKLVKEGDENNVALQYTLNGGSAQEVNFAPTVKTSVS…
NY01	265995	268062	+	4	8	ATTGAGTTGTTGTATTTAATATATAAAATAGCTAAAATCCTTTAAAAATC	GAAGAAGAAGAAGAAGAAGAAGAA	GTTCTTAGAAGTTTAGGAGTTAGCGACTACTCTGATCGGCGAAAATAAAC	VKRKNILKFVSLLGIGSFVMLAAASCTTPVNPTPNPTPNPTPNPTPNPQPKPDPMPNPPSNGGGMNGVDTNPGNGGGMDNAAQQLAAVRTALTTLINSRTQNTELYVDYAKIQDTLVKAYDAAKAVLDNTASTTQNINQAKTTLETAINAAVKARRDFDAANDPLVTAYNALKETLKNEETVLGGLTDSNFATIKTNLTALYQSGKDFVKATLDPVSGNAPQSADITKADKDITDAVSKLETWKTNATFLATNFLKKVLVKTNLTNSSTDNNQEQPGNYSFVGYSVNATNNDEIPNWNFAQRKVWTSDNGRTSLVSSTSENSSPLTEVSWIYSLLGAGTKYSLTFNYYGPSTGYLYFPYKLVKEGDENNVALQYTLNGGSAQEVNFAPTVKTSVSADSS…
Rhigh	258200	260240	+	4	10	AATTGTATATTTGGTTTTAATATAAATATCAACAAAACCTTTTGTTTTCC	GAAGAAGAAGAAGAAGAAGAAGAAGAAGAA	GTTCTTAGGAGTTCTGTGGTCTGGGGTTGGTTTGATCAGCGAAAATAAAC	VKRKNILKFVSLLGIGSFVMLAAASCTSATTPTPNPEPKPTPNPEPKPDPMPNPPSGGMNGGDTNPGNDGGMENSAQQLAAAKKELSDLLATQSSNLAKYADYTNIQNTLTAAYTTAKSTSDNTSVTLEQVKSATSTLQAAIDTAASSKTSFDEKNPELIKAYYALKETLKNEETVLSGLTDSNFATIKTNLTALYQSGKDFVKATLDPVSGNAPQSADITKADKDIADAVSKLETWKTNANTLATSFVKEVLVKNKLTGIDTTNNREQPGNYSFVGYSVNATNNNEIPNWNFAQRKVWTSDNGRTSLISSTSDNSSTLTEVSWIYSLSGAGTKYSLTFNYYGPSTGYLYFPYKLVKQGDENNVALQYTLNGGSAQEVKFAPTVKTSVSADSSGDSNNQ…
Rhigh	272385	274425	+	4	8	AATTGTATATTTGGTTTTAATATAAATATCAACAAAACCTTTTGTTTTCC	GAAGAAGAAGAAGAAGAAGAAGAA	GTTCTTAGGAGTTCTGTGGTCTGGGGTTGGTTTGATCAGCGAAAATAAAC	VKRKNILKFVSLLGIGSFVMLAAASCTSATTPTPNPEPKPTPNPEPKPDPMPNPPSGGMNGGDTNPGNDGGMENSAQQLAAAKKELSDLLATQSSNLAKYADYTNIQNTLTAAYTTAKSTSDNTSVTLEQVKSATSTLQAAIDTAASSKTSFDEKNPELIKAYYALKETLKNEETVLSGLTDSNFATIKTNLTALYQSGKDFVKATLDPVSGNAPQSADITKADKDIADAVSKLETWKTNANTLATSFVKEVLVKNKLTGIDTTNNREQPGNYSFVGYSVNATNNNEIPNWNFAQRKVWTSDNGRTSLISSTSDNSSTLTEVSWIYSLSGAGTKYSLTFNYYGPSTGYLYFPYKLVKQGDENNVALQYTLNGGSAQEVKFAPTVKTSVSADSSGDSNNQ…
Rlow	258271	260311	+	4	10	AATTGTATATTTGGTTTTAATATAAATATCAACAAAACCTTTTGTTTTCC	GAAGAAGAAGAAGAAGAAGAAGAAGAAGAA	GTTCTTAGGAGTTCTGTGGTCTGGGGTTGGTTTGATCAGCGAAAATAAAC	VKRKNILKFVSLLGIGSFVMLAAASCTSATTPTPNPEPKPTPNPEPKPDPMPNPPSGGMNGGDTNPGNDGGMENSAQQLAAAKKELSDLLATQSSNLAKYADYTNIQNTLTAAYTTAKSTSDNTSVTLEQVKSATSTLQAAIDTAASSKTSFDEKNPELIKAYYALKETLKNEETVLSGLTDSNFATIKTNLTALYQSGKDFVKATLDPVSGNAPQSADITKADKDIADAVSKLETWKTNANTLATSFVKEVLVKNKLTGIDTTNNREQPGNYSFVGYSVNATNNNEIPNWNFAQRKVWTSDNGRTSLISSTSDNSSTLTEVSWIYSLSGAGTKYSLTFNYYGPSTGYLYFPYKLVKQGDENNVALQYTLNGGSAQEVKFAPTVKTSVSADSSGDSNNQ…
Rlow	272459	274499	+	4	7	AATTGTATATTTGGTTTTAATATAAATATCAACAAAACCTTTTGTTTTCC	GAAGAAGAAGAAGAAGAAGAA	GTTCTTAGGAGTTCTGTGGTCTGGGGTTGGTTTGATCAGCGAAAATAAAC	VKRKNILKFVSLLGIGSFVMLAAASCTSATTPTPNPEPKPTPNPEPKPDPMPNPPSGGMNGGDTNPGNDGGMENSAQQLAAAKKELSDLLATQSSNLAKYADYTNIQNTLTAAYTTAKSTSDNTSVTLEQVKSATSTLQAAIDTAASSKTSFDEKNPELIKAYYALKETLKNEETVLSGLTDSNFATIKTNLTALYQSGKDFVKATLDPVSGNAPQSADITKADKDIADAVSKLETWKTNANTLATSFVKEVLVKNKLTGIDTTNNREQPGNYSFVGYSVNATNNNEIPNWNFAQRKVWTSDNGRTSLISSTSDNSSTLTEVSWIYSLSGAGTKYSLTFNYYGPSTGYLYFPYKLVKQGDENNVALQYTLNGGSAQEVKFAPTVKTSVSADSSGDSNNQ…
S6	266678	268718	+	4	9	AATTGTAGATTTGGTTTTAATATAAATATCAACAAAACCTTTTGTTTTCC	GAAGAAGAAGAAGAAGAAGAAGAAGAA	GTTCTTAGGAGTTCTGTGGTCTGGGGTTGGTTTGATCAGCGAAAATAAAC	VKRKNILKFVSLLGIGSFVMLAAASCTSATTPTPNPEPKPTPNPEPKPDPMPNPPSGDMNGGDTNPGNDGGMENSAQQLAAAKKELSDLLATQSSNLAKYADYTNIQNTLTAAYTTAKSTSDNTSVTLEQVKSATSTLQAAIDTAASSKTSFDEKNPELIKAYYALKETLKNEETVLSGLTDSNFATIKTNLTALYQSGKDFVKATLDPVSGNAPQIADITKADKDIADAVSKLETWKTNANTLATSFVKEVLVKNKLTGIDTTNNREQPGNYSFVGYSVNATNNNEIPNWNFAQRKVWTSDNGRTSLISSTSDNSSTLTEVSWIYSLSGAGTKYSLTFNYYGPSTGYLYFPYKLVKEGDENNVALQYTLNSGSAQEVNFAPTVKTSVSADSSGDSNNQ…
VA94	276755	278834	+	4	11	ATTGAGTTGTTGTATTTAATATATAAAATAGCTAAAATCCTTTAAAAATC	GAAGAAGAAGAAGAAGAAGAAGAAGAAGAAGAA	GTTCTTAGAAGTTTAGGAGTTAGCGACTACTCTGATCGGCGAAAATAAAC	VKRKNILKFVSLLGIGSFVMLAAASCTTATTPTPNPEPKPKPNPEPKPNPNPEPKPDPMPNPPSNGGGMNGVDTNPGNGGGMDNAAQQLAAVRTALTTLINSRTQNTELYVDYAKIQDTLVKAYDAAKAVLDNTASTTQNINQAKTTLETAINAAVKARRDFDAANDPLVTAYNALKETLKNEETVLGGLTDSNFATIKTNLTALYQSGKDFVKATLDPVSGNAPQSADITKADKDITDAVSKLETWKTNATFLATNFLKKVLVKTNLTNSSTDNNQEQPGNYSFVGYSVNATNNDEIPNWNFAQRKVWTSDNGRTSLVSSTSENSSPLTEVSWIYSLLGAGTKYSLTFNYYGPSTGYLYFPYKLVKEGDENNVALQYTLNGGSAQEVNFAPTVKTSVS…
W101	543944	545993	-	4	10	TAAGTAGTTGTAAGTACGATAAAAACAAGGTAAAACCTTTTGTTTTCCAA	GAAGAAGAAGAAGAAGAAGAAGAAGAAGAA	GTTCTTAGAAGTTTTGGGGCTTTCGGCTGAACTAATCAGCGAAAATTAAG	VKRKNILKFVSLLGIGSFVMLAAASCTSATTPTPNPEPKPTPNPEPKPDPMPNPPSGGMNGGNTNPGNGGRMDNAAQQLVAARTALTTLINSKTQNTELYVDYAKIQDTLVKAYDAAKVVLDNTASTTQNINQAKTTLETAINAAAKARRDFDAANGPLVTAYNALKETLKNEETVLGGLTDSNFATIKTNLTALYQSGKDFVKATLDPVSGNAPQSADITKADKDITDAVSKLETWKTNATFLATNFLKKVLVKTNLTNSSTDNNQEQPGNYSFVGYSVNATNNDKIPNWNFAQRKVWTSDNGRTSLVSSTSENSSPLTEVSWIYSLLGAGTKYSLTFNYYGPSTGYLYFPYKLVKEGDENNVALQYTLNGGSAQEVNFAPTVKTSVSADSSGDSNNQ…
CA06	444268	446263	+	5	8	ATTTAGTTGTTGCATTCACTATATAAAATGGCTAAAAACCTTTAAACATC	GAAGAAGAAGAAGAAGAAGAAGAA	GTTCTTAGAAGTTTAGGAGTTAGCGGATGCTCTGATCAGCGAAAATAAAC	VKRKNILKFVSLLGIGSFVMLAAASCTQATTPTPNPEPKPNPNPEPKPDPMPNPPSGGMNGGDINPGGGQNMMDSAAQELTAARTALTSLLASKNANVEMYSDYAKIQNTLIAAYTTAEQTSQNSSATLEQVKNATSALQTAINTANSNKQKFDQDHSNLLMSYKNLMATLAKKETAVMTLKDPKYSAILDQINGVSSKGEELVQHTLDPVSGIVPAANTITEEITKIEEVISEKTLQDQKNNADQFANYQSFTLDKTKLENVEDAKKMGQPANYSFVGYSVDVTGTSGQETTIPNWNFAQRAIFTSGNQPTKVTATTTGEDQSTAKPLSDVSWIYSLAGTGAKYTLEFTYYGPSTGWLYFPYKLVKANDDVGLQYKLNSNETLTPIIFGEGTTTNGPA…
F	793650	795630	-	5	12	ATAACTTGTGATGGTTTTAACTGTAAAAACTCATAAAATCTTTTGTTTTC	GAAGAAGAAGAAGAAGAAGAAGAAGAAGAAGAAGAA	GTTCTTAGAAGTTTTGGGGTTTGGGAATCCTGTGATCAGCGAAAATTAAG	VKRKNILKFVSLLGIGSFVMVAAASCTSAATPTPNPEPKPNPNPEPKPDPMPNPPSGGMNGGDINPGGGQNMMDSAAQELTAARTALTSLLASKNANIEMYSDYAKIQNTLIAAYTTAEQTSQNSSATLEQVKNATSALQTAINTANSNKQKFDQDHSNLLMSYKNLMATLAKKETTVMTLKDPKYSAILDQINGVSSKGEELVQHTLDPVSGIVPAANTITEEITKIEEVISEKTLQDQKNNADQFANYQSFTLDKTKLENVEDAKKMGQPANYSFVGYSVDVTGTSGQETTIPNWNFAQRAIFTSGNQPTKVTATTTGEDQSTAKPLSDVSWIYSLAGTGAKYTLEFTYYGPSTGWLYFPYKLVKANDDVGLQYKLNSNETLTPIIFGEGTTTNGPA…
NC96	449732	451727	+	5	6	ATTTAGTTGTTGCATTCACTATATAAAATGGCTAAAAACCTTTAAACATC	GAAGAAGAAGAAGAAGAA	GTTCTTAGAAGTTTAGGAGTTAGCGGATGCTCTGATCAGCGAAAATAAAC	VKRKNILKFVSLLGIGSFVMLAAASCTQATTPTPNPEPKPNPNPEPKPDPMPNPPSGGMNGGDINPGGGQNMMDSAAQELTAARTALTSLLASKNANVEMYSDYAKIQNTLIAAYTTAEQTSQNSSATLEQVKNATSALQTAINTANSNKQKFDQDHSNLLMSYKNLMATLAKKETAVMTLKDPKYSAILDQINGVSSKGEELVQHTLDPVSGIVPAANTITEEITKIEEVISEKTLQDQKNNADQFANYQSFTLDKTKLENVEDAKKMGQPANYSFVGYSVDVTGTSGQETTIPNWNFAQRAIFTSGNQPTKVTATTTGEDQSTAKPLSDVSWIYSLAGTGAKYTLEFTYYGPSTGWLYFPYKLVKANDDVGLQYKLNSNETLTPIIFGEGTTTNGPA…
NY01	561871	563866	-	5	9	ATTTAGTTGTTGCATTCACTATATAAAATGGCTAAAAACCTTTAAACATC	GAAGAAGAAGAAGAAGAAGAAGAAGAA	GTTCTTAGAAGTTTAGGAGTTAGCGGATGCTCTGATCAGCGAAAATAAAC	VKRKNILKFVSLLGIGSFVMLAAASCTQATTPTPNPEPKPNPNPEPKPDPMPNPPSGGMNGGDINPGGGQNMMDSAAQELTAARTALTSLLASKNANVEMYSDYAKIQNTLIAAYTTAEQTSQNSSATLEQVKNATSALQTAINTANSNKQKFDQDHSNLLMSYKNLMATLAKKETAVMTLKDPKYSAILDQINGVSSKGEELVQHTLDPVSGIVPAANTITEEITKIEEVISEKTLQDQKNNADQFANYQSFTLDKTKLENVEDAKKMGQPANYSFVGYSVDVTGTSGQETTIPNWNFAQRAIFTSGNQPTKVTATTTGEDQSTAKPLSDVSWIYSLAGTGAKYTLEFTYYGPSTGWLYFPYKLVKANDDVGLQYKLNSNETLTPIIFGEGTTTNGPA…
Rhigh	833358	835329	-	5	13	AATTGTAGATTTGGTTTTAATATAAATATCGATAAAACCTTTTGTTTTCC	GAAGAAGAAGAAGAAGAAGAAGAAGAAGAAGAAGAAGAA	GTTCTTAGGAGTTCTGTGGTCTGGGGTTGGTTTGATCAGCGAAAATAAAC	VKRKNILKFVSLLGIGSFVMLAAASCTSATTPTPNPEPKPTPNPEPKPDPMPNPPSGGMNGGDINPGGGQNMMDSAAQELTAARTALTSLLASKNANVEMYSDYAKIQNTLIAAYTTAEQTSQNSSATLEQVKNATSALQTAINTANSNKQKFDQDHSNLLMSYKNLMATLAKKETAVMTLKDPKYSAILDQINGVSSKGEELVQHTLDPVSGIVPAANTITEEITKIEEVISEKTLQDQKNNADQFANYQSFTLDKTKLENVEDAKKMGQPANYSFVGYSVDVTGTSGQETTIPNWNFAQRAIFTSGNQPTKVTATTTGEDQSTAKPLSDVSWIYSLAGTGAKYTLEFTYYGPSTGWLYFPYKLVKANDDVGLQYKLNSNETLTPIIFGEGTTTNGPA…
Rlow	833558	835529	-	5	9	AATTGTAGATTTGGTTTTAATATAAATATCGATAAAACCTTTTGTTTTCC	GAAGAAGAAGAAGAAGAAGAAGAAGAA	GTTCTTAGGAGTTCTGTGGTCTGGGGTTGGTTTGATCAGCGAAAATAAAC	VKRKNILKFVSLLGIGSFVMLAAASCTSATTPTPNPEPKPTPNPEPKPDPMPNPPSGGMNGGDINPGGGQNMMDSAAQELTAARTALTSLLASKNANVEMYSDYAKIQNTLIAAYTTAEQTSQNSSATLEQVKNATSALQTAINTANSNKQKFDQDHSNLLMSYKNLMATLAKKETAVMTLKDPKYSAILDQINGVSSKGEELVQHTLDPVSGIVPAANTITEEITKIEEVISEKTLQDQKNNADQFANYQSFTLDKTKLENVEDAKKMGQPANYSFVGYSVDVTGTSGQETTIPNWNFAQRAIFTSGNQPTKVTATTTGEDQSTAKPLSDVSWIYSLAGTGAKYTLEFTYYGPSTGWLYFPYKLVKANDDVGLQYKLNSNETLTPIIFGEGTTTNGPA…
S6	269082	271062	+	5	23	ATAACTTGTGATGGTTTTAACTGTAAAAACTCATAAAATCTTTTGTTTTC	GAAGAAGAAGAAGAAGAAGAAGAAGAAGAGAGAAGAAGAAGAAGAAGAAGAAGAAGAAGAAGAAGAAGAA	GTTCTTAGAAGTTTTGGGGTTTGGGAATCCTGTGATCAGCGAAAATTAAG	VKRKNILKFVSLLGIGSFVMVAAASCTSAATPTPNPEPKPNPNPEPKPDPMPNPPSGGMNGGDINPGGGQNMMDSAAQELTAARTALTSLLASKNANIEMYSDYAKIQNTLIAAYTTAEQTSQNSSATLEQVKNATSALQTAINTANSNKQKFDQDHSNLLMSYKNLMATLAKKETTVMTLKDPKYSAILDQINGVSSKGEELVQHTLDPVSGIVPAANTITEEITKIEEVISEKTLQDQKNNADQFANYQSFTLDKTKLENVEDAKKMGQPANYSFVGYSVDVTGTSGQETTIPNWNFAQRAIFTSGNQPTKVTATTTGEDQSTAKPLSDVSWIYSLAGTGAKYTLEFTYYGPSTGWLYFPYKLVKANDDVGLQYKLNSNETLTPIIFGEGTTTNGPA…
CA06	270567	272586	+	6	9	ATTGAGTTGTTGTATTTAATATATAAAATAGCTAAAATCCTTTAGAAATC	GAAGAAGAAGAAGAAGAAGAAGAAGAA	GTTCTTAGAAGTTTAGGAGTTAGCGGATGCTCTGATCAGCGAAAATAAAC	VKRKNILKFVSLLGIGSFVMLAAASCTSATTPTPNPEPKPNPEPKPDPMPNPPSGGMNGGDTNPGMDTAAQELANAKAALTTLTNSESEKVGLYVDYAKISAKLSAAYTTAKNVLNNSASTTQNINAARTTLEAEIAAAAKAKTDFDAQHGSLVEAYNNLKETLKEEKINLDSLANENYAAIRTNLNSLYEKANTIVTATLDPATGNISEVMSVTQANQDITNATSRLVAWKQNADNLANSFIKQSLVKNNLTGVDVANSQEQPANYSFVGFSVNVDTPNWNFAQRKVWASENTPLATTPTEDATKQAASLTDVSWIYSLNGAEAKYTLSFRYFGAEKTAYLYFPYKLVKTSDNVGLQYKLNGGDTKQINFVQTPASGSSDVAANEEETMASPAEMQSA…
F	791276	793289	-	6	13	AAAAAATTTCTCTGAATTTACTATGAAAATTAGTGAAACCCTTGATTTTC	GAAGAAGAAGAAGAAGAAGAAGAAGAAGAAGAAGAAGAA	GTTCTTAGAAGTTCTGTGGTCTGGGGTTGGTTTGATCAGCGAAAATAAAC	VKRKNILKFVSLLGIGSFVMLAAASCTSAATPTPNPEPKPTPNPEPKPDPMPNPPSGGNMNGGNTNPSDGQGMMNAAAKELADAKAALTTLINGETANLASYEDYAKIKSELTSAYETAKAVSAKTGATLNEVNEAKTTLDAAIKKAASAKNDFDAQHGSLVEAYNNLKETLKEEKTNLDSLANENYAAIRTNLNSLYEKANTIVTATLDPATGNIPEVMSVTQANQDITNATSRLIAWKQNADNLANSFIKQSLVKNNLTRVDVANNQEQPANYSFVGFSVNVDTPNWNFAQRKVWASENTPLATTPAEDATQQAASLTDVSWIYSLNGAEAKYTLSFRYFGAEKTAYLYFPYKLVKTSDNVGLQYKLNGGDTKQINFVQTPASGSSDVAANEEETMA…
NC08	271015	273034	+	6	9	ATTGAGTTGTTGTATTTAATATATAAAATAGCTAAAATCCTTTAGAAATC	GAAGAAGAAGAAGAAGAAGAAGAAGAA	GTTCTTAGAAGTTTAGGAGTTAGCGGATGCTCTGATCAGCGAAAATAAAC	VKRKNILKFVSLLGIGSFVMLAAASCTSATTPTPNPEPKPNPEPKPDPMPNPPSGGMNGGDTNPGMDTAAQELANAKAALTTLTNSESEKVGLYVDYAKISAKLSAAYTTAKNVLNNSASTTQNINAARTTLEAEIAAAAKAKTDFDAQHGSLVEAYNNLKETLKEEKINLDSLANENYAAIRTNLNSLYEKANTIVTATLDPATGNIPEVMSVTQANQDITNATSRLVAWKQNADNLANSFIKQSLVKNNLTGVDVANSQEQPANYSFVGFSVNVDTPNWNFAQRKVWASENTPLATTPTEDATKQAASLTDVSWIYSLNGAEAKYTLSFRYFGAEKTAYLYFPYKLVKTSDNVGLQYKLNGGDTKQINFVQTPASGSSDVAANEEETMASPAEMQSA…
NC95	276007	278026	+	6	9	ATTGAGTTGTTGTATTTAATATATAAAATAGCTAAAATCCTTTAGAAATC	GAAGAAGAAGAAGAAGAAGAAGAAGAA	GTTCTTAGAAGTTTAGGAGTTAGCGGATGCTCTGATCAGCGAAAATAAAC	VKRKNILKFVSLLGIGSFVMLAAASCTSATTPTPNPEPKPNPEPKPDPMPNPPSGGMNGGDTNPGMDTAAQELANAKAALTTLTNSESEKVGLYVDYAKISAKLSAAYTTAKNVLNNSASTTQNINAARTTLEAEIAAAAKAKTDFDAQHGSLVEAYNNLKETLKEEKINLDSLANENYAAIRTNLNSLYEKANTIVTATLDPATGNIPEVMSVTQANQDITNATSRLVAWKQNADNLANSFIKQSLVKNNLTGVDVANSQEQPANYSFVGFSVNVDTPNWNFAQRKVWASENTPLATTPTEDATKQAASLTDVSWIYSLNGAEAKYTLSFRYFGAEKTAYLYFPYKLVKTSDNVGLQYKLNGGDTKQINFVQTPASGSSDVAANEEETMASPAEMQSA…
NC96	276045	278064	+	6	17	ATTGAGTTGTTGTATTTAATATATAAAATAGCTAAAATCCTTTAGAAATC	GAAGAAGAAGAAGAAGAAGAAGAAGAAGAAGAAGAAGAAGAAGAAGAAGAA	GTTCTTAGAAGTTTAGGAGTTAGCGGATGCTCTGATCAGCGAAAATAAAC	VKRKNILKFVSLLGIGSFVMLAAASCTSATTPTPNPEPKPNPEPKPDPMPNPPSGGMNGGDTNPGMDTAAQELANAKAALTTLTNSESEKVGLYVDYAKISAKLSAAYTTAKNVLNNSASTTQNINAARTTLEAEIAAAAKAKTDFDAQHGSLVEAYNNLKETLKEEKINLDSLANENYAAIRTNLNSLYEKANTIVTATLDPATGNIPEVMSVTQANQDITNATSRLVAWKQNADNLANSFIKQSLVKNNLTGVDVANSQEQPANYSFVGFSVNVDTPNWNFAQRKVWASENTPLATTPTEDATKQAASLTDVSWIYSLNGAEAKYTLSFRYFGAEKTAYLYFPYKLVKTSDNVGLQYKLNGGDTKQINFVQTPASGSSDVAANEEETMASPAEMQSA…
NY01	281167	283186	+	6	8	ATTGAGTTGTTGTATTTAATATATAAAATAGCTAAAATCCTTTAGAAATC	GAAGAAGAAGAAGAAGAAGAAGAA	GTTCTTAGAAGTTTAGGAGTTAGCGGATGCTCTGATCAGCGAAAATAAAC	VKRKNILKFVSLLGIGSFVMLAAASCTSATTPTPNPEPKPNPEPKPDPMPNPPSGGMNGGDTNPGMDTAAQELANAKAALTTLTNSESEKVGLYVDYAKISAKLSAAYTTAKNVLNNSASTTQNINAARTTLEAEIAAAAKAKTDFDAQHGSLVEAYNNLKETLKEEKINLDSLANENYAAIRTNLNSLYEKANTIVTATLDPATGNIPEVMSVTQANQDITNATSRLVAWKQNADNLANSFIKQSLVKNNLTGVDVANSQEQPANYSFVGFSVNVDTPNWNFAQRKVWASENTPLATTPTEDATKQAASLTDVSWIYSLNGAEAKYTLSFRYFGAEKTAYLYFPYKLVKTSDNVGLQYKLNGGDTKQINFVQTPASGSSDVAANEEETMASPAEMQSA…
Rhigh	291778	293884	+	6	6	ATTGAGTTGTTGTATTTAATATATAAAATAGCTAAAATCCTTTAGAAATC	GAAGAAGAAGAAGAAGAA	GTTCTTAGAAGTTTAGGAGTTAGCGGATGCTCTGATCAGCGAAAATAAAC	VKRKNILKFVSLLGIGSFVMLAAASCTSATTPTPNPEPKPNPEPKPDPMPNPPSGGMNGGDTNPGMDTAAQELANAKAALTTLTNSESEKVGLYVDYAKISAKLSAAYTTAKNVLNNSASTTQNINAARTTLEAEIAAAAKAKTDFDAQHASLVEAYNNLKETLKEEKTNLDSIANENYAAIRTNLNSLYEKANTIVTATLDPATGNIPEVMSVTQANQDITNATSKLVAWKQNADNLANSFIKQSLVKNNLTGVDEANNQEQPRNYSFVGFSVNVDTPNWNFAQRKVWASENTPLATTPTEDATKQAAPLTDVSWIYSLNGAEAKYTLSFRYFGAEKTAYLYFPYKLVKDSDKDKVALNYKLNDEMAKAVDFKTSSSAPSVTPAPAIPAAAPAAKPAA…
Rlow	291870	293976	+	6	8	ATTGAGTTGTTGTATTTAATATATAAAATAGCTAAAATCCTTTAGAAATC	GAAGAAGAAGAAGAAGAAGAAGAA	GTTCTTAGAAGTTTAGGAGTTAGCGGATGCTCTGATCAGCGAAAATAAAC	VKRKNILKFVSLLGIGSFVMLAAASCTSATTPTPNPEPKPNPEPKPDPMPNPPSGGMNGGDTNPGMDTAAQELANAKAALTTLTNSESEKVGLYVDYAKISAKLSAAYTTAKNVLNNSASTTQNINAARTTLEAEIAAAAKAKTDFDAQHASLVEAYNNLKETLKEEKTNLDSIANENYAAIRTNLNSLYEKANTIVTATLDPATGNIPEVMSVTQANQDITNATSKLVAWKQNADNLANSFIKQSLVKNNLTGVDEANNQEQPRNYSFVGFSVNVDTPNWNFAQRKVWASENTPLATTPTEDATKQAAPLTDVSWIYSLNGAEAKYTLSFRYFGAEKTAYLYFPYKLVKDSDKDKVALNYKLNDEMAKAVDFKTSSSAPSVTPAPAIPAAAPAAKPAA…
S6	271453	273514	+	6	22	AAAAATTTTCTCTGAATTTACTATGAAAATTAGTGAAACCCTTGATTTTC	GAAGAAGAAGAAGAAGAAGAAGAAGAGAAGAAGAAGAAGAAGAAGAAGAAGAAGAAGAAGAAGAAGAA	GTTCTTAGAAGTTCTGTGGTCTGGGGTTGGTTTGATCAGCGAAAATAAAC	VKRKNILKFVSLLGIGSFVMLAAASCTSAATPTPNPEPKPTPNPEPKPDPMPNPPSGGNMNGGNTNPSDGQGMMNAAAKELADAKAALTTLINGETANLASYEDYAKIKSELTSAYETAKAVSAKTGATLNEVNEAKTTLDAAIKKAASAKNDFDAQHTSLVKAYNNLKETLKEEKTNLDSLANENYAAIRTNLNSLYKKANTIVTATLDPTTGNIPEVMSVTQANQDIANATSKLVAWKQNADNLANSFIKQSLVKNNLTGVDEANNQEQPGNYSFVGFSVDVNGAQNNNRPNWSFAERKIWASEKTPLATTTAEDATQQAAPLTDVSWIYSLNGAEAKYKLSFRYFGAEKTAYLYFPYKLVKTSDNVGLQYKLNGGDTKQINFVQTPASGSSDVAAN…
VA94	286763	288782	+	6	11	ATTGAGTTGTTGTATTTAATATATAAAATAGCTAAAATCCTTTAGAAATC	GAAGAAGAAGAAGAAGAAGAAGAAGAAGAAGAA	GTTCTTAGAAGTTTAGGAGTTAGCGGATGCTCTGATCAGCGAAAATAAAC	VKRKNILKFVSLLGIGSFVMLAAASCTSATTPTPNPEPKPNPEPKPDPMPNPPSGGMNGGDTNPGMDTAAQELANAKAALTTLTNSESEKVGLYVDYAKISAKLSAAYTTAKNVLNNSASTTQNINAARTTLEAEIAAAAKAKTDFDAQHGSLVEAYNNLKETLKEEKINLDSLANENYAAIRTNLNSLYEKANTIVTATLDPATGNIPEVMSVTQANQDITNATSRLVAWKQNADNLANSFIKQSLVKNNLTGVDVANSQEQPANYSFVGFSVNVDTPNWNFAQRKVWASENTPLATTPTEDATKQAASLTDVSWIYSLNGAEAKYTLSFRYFGAEKTAYLYFPYKLVKTSDNVGLQYKLNGGDTKQINFVQTPASGSSDVAANEEETMASPAEMQSA…
W101	267695	269714	+	6	8	ATTGAGTTGTTGTATTTAATATATAAAATAGCTAAAATCCTTTAGAAATC	GAAGAAGAAGAAGAAGAAGAAGAA	GTTCTTAGAAGTTTAGGAGTTAGCGGATGCTCTGATCAGCGAAAATAAAC	VKRKNILKFVSLLGIGSFVMLAAASCTSATTPTPNPEPKPNPEPKPDPMPNPPSGGMNGGDTNPGMDTAAQELANAKAALTTLTNSESEKVGLYVDYAKISAKLSAAYTTAKNVLNNSASTTQNINAARTTLEAEIAAAAKAKTDFDAQHGSLVEAYNNLKETLKEEKINLDSLANENYAAIRTNLNSLYEKANTIVTATLDPATGNIPEVMSVTQANQDITNATSRLVAWKQNADNLANSFIKQSLVKNNLTGVDVANSQEQPANYSFVGFSVNVDTPNWNFAQRKVWASENTPLATTPTEDATKQAASLTDVSWIYSLNGAEAKYTLSFRYFGAEKTAYLYFPYKLVKTSDNVGLQYKLNGGDTKQINFVQTPASGSSDVAANEEETMASPAEMQSA…
CA06	794951	796898	-	8	10	TAAATTATTTCTGAATTAACTGTAAAAATGAACGAAACCTTTTGTTTTCC	GAAGAAGAAGAAGAAGAAGAAGAAGAAGAA	GTTCTGGGGTTTGGGGCTGGTTTGATCAGTGAAAATTAAGCAGATTTATT	VKRKNILKFVSLLGIGSFVMLAAASCTTPTPNPTPNPNPPSGGMNGGDTNPGDGQGMMNAASQELEAARMGLTTVFDSKAKNLGLYVDYKKTQQNLTKAYDAAKTVLDNSSSTTQNLNEAKTRLETAIRTAATSKQTFDEQHAELVKVYKELKTTLSNETATLAPYEEAQYAGIKMHLSGLYDSGKAITTKTLEPVEGDPLTADVVMMANTKIVEAIKDEVLNPQKENATKLADSFVKQVLVKEKITGVEEAHKKAQPANYSFVGYSVDITGTATGQTSIPNWDYAQRTIFTNGDEPRSVSNTPADGQTMVQPLSNVSWIYSLAGTGAKYTLEFTYYGPSTGYLYFPYKLVNTSDQMKLGLEYKLNDATEPSAITFGSEQTMNGKTPTVNDINVAKVTL…
F	256125	258078	+	8	12	TAAATTATTTCTGAATTAACTGTAAAAATGAACGAAACCTTTTGTTTTCC	GAAGAAGAAGAAGAAGAAGAAGAAGAAGAAGAAGAA	GTTCTTAGGAGTTCTGGGGTTTGGGGCTGGTTTGATCAGTGAAAATTAAG	VKRKNILKFVSLLGIGSFVMLAAASCTTPTPNPTPNPNPPSGGMNGGDTNPGDGQGMMNAASQELEAARMGLTTVFDSKAKNLGLYVDYKKTQQNLTKAYDAAKTVLDNSSSTTQNLNEAKTRLETAIRTAATSKQTFDEQHAELVKVYKELKTTLSNETATLAPYEEAQYAGIKMHLSGLYDAGKAITTKTLEPVEGDPLTADVVMMANTKIVEAIKDEVLNPQKENATKLADSFVKQVLVKEKITGVEEAHNKAQPANYSFVGYSVDITGTTTGQTSIPNWDYAQRTIFTNGDEPRSISNTPADGQTMAQPLSNVSWIYSLAGTGAKYTLEFTYYGPSTGYLYFPYKLVNTSDQMKLGLEYKLNDATEPSTITFGSEQTMNGKTPTVNDINVAKVTL…
MC06	539692	541639	-	8	14	TAAATTATTTCTGAATTAACTGTAAAAATGAACGAAACCTTTTGTTTTCC	GAAGAAGAAGAAGAAGAAGAAGAAGAAGAAGAAGAAGAAGAA	GTTCTTAGGAGTTCTGGGGTTTGGGGCTGGTTTGATCAGTGAAAATTAAG	VKRKNILKFVSLLGIGSFVMLAAASCTTPTPNPTPNPNPPSGGMNGGDTNPGDGQGMMNAASQELEAARMGLTTVFDSKAKNLGLYVDYKKTQQNLTKAYDAAKTVLDNSSSTTQNLNEAKTRLETAIRTAATSKQTFDEQHAELVKVYKELKTTLSNETATLAPYEEAQYAGIKMHLSGLYDSGKAITTKTLEPVEGDPLTADVVMMANTKIVEAIKDEVLNPQKENATKLADSFVKQVLVKEKITGVEEAHKKAQPANYSFVGYSVDITGTATGQTSIPNWDYAQRTIFTNGDEPRSVSNTPADGQTMVQPLSNVSWIYSLAGTGAKYTLEFTYYGPSTGYLYFPYKLVNTSDQMKLGLEYKLNDATEPSAITFGSEQTMNGKTPTVNDINVAKVTL…
MC06	770761	772708	-	8	15	TAAATTATTTCTGAATTAACTGTAAAAATGAACGAAACCTTTTGTTTTCC	GAAGAAGAAGAAGAAGAAGAAGAAGAAGAAGAAGAAGAAGAAGAA	GTTCTTAGGAGTTCTGGGGTTTGGGGCTGGTTTGATCAGTGAAAATTAAG	VKRKNILKFVSLLGIGSFVMLAAASCTTPTPNPTPNPNPPSGGMNGGDTNPGDGQGMMNAASQELEAARMGLTTVFDSKAKNLGLYVDYKKTQQNLTKAYDAAKTVLDNSSSTTQNLNEAKTRLETAIRTAATSKQTFDEQHAELVKVYKELKTTLSNETATLAPYEEAQYAGIKMHLSGLYDSGKAITTKTLEPVEGDPLTADVVMMANTKIVEAIKDEVLNPQKENATKLADSFVKQVLVKEKITGVEEAHKKAQPANYSFVGYSVDITGTATGQTSIPNWDYAQRTIFTNGDEPRSVSNTPADGQTMVQPLSNVSWIYSLAGTGAKYTLEFTYYGPSTGYLYFPYKLVNTSDQMKLGLEYKLNDATEPSAITFGSEQTMNGKTPTVNDINVAKVTL…
NC08	765799	767746	-	8	8	TAAATTATTTCTGAATTAACTGTAAAAATGAACGAAACCTTTTGTTTTCC	GAAGAAGAAGAAGAAGAAGAAGAA	GTTCTTAGGAGTTCTGGGGTTTGGGGCTGGTTTGATCAGTGAAAATTAAG	VKRKNILKFVSLLGIGSFVMLAAASCTTPTPNPTPNPNSPSGGMNGGDTNPGDGQGMMNAASQELEAARMGLTTVFDSKAKNLGLYVDYKKTQQNLTKAYDAAKTVLDNSSSTTQNLNEAKTRLETAIRTAATSKQTFDEQHAELVKVYKELKTTLSNETATLAPYEEAQYAGIKMHLSGLYDSGKAITTKTLEPVEGDPLTADVVMMANTKIVEAIKDEVLNPQKENATKLADSFVKQVLVKEKITGVEEAHKKAQPANYSFVGYSVDITGTATGQTSIPNWDYAQRTIFTNGDEPRSVSNTPADGQTMVQPLSNVSWIYSLAGTGAKYTLEFTYYGPSTGYLYFPYKLVNTSDQMKLGLEYKLNDATEPSAITFGSEQTMNGKTPTVNDINVAKVTL…
NC95	771417	773364	-	8	10	TAAATTATTTCTGAATTAACTGTAAAAATGAACGAAACCTTTTGTTTTCC	GAAGAAGAAGAAGAAGAAGAAGAAGAAGAA	GTTCTTAGGAGTTCTGGGGTTTGGGGCTGGTTTGATCAGTGAAAATTAAG	VKRKNILKFVSLLGIGSFVMLAAASCTTPTPNPTPNPNPPSGGMNGGDTNPGDGQGMMNAASQELEAARMGLTTVFDSKAKNLGLYVDYKKTQQNLTKAYDAAKTVLDNSSSTTQNLNEAKTRLETAIRTAATSKQTFDEQHAELVKVYKELKTTLSNETATLAPYEEAQYAGIKMHLSGLYDSGKAITTKTLEPVEGDPLTADVVMMANTKIVEAIKDEVLNPQKENATKLADSFVKQVLVKEKITGVEEAHKKAQPANYSFVGYSVDITGTATGQTSIPNWDYAQRTIFTNGDEPRSVSNTPADGQTMVQPLSNVSWIYSLAGTGAKYTLEFTYYGPSTGYLYFPYKLVNTSDQMKLGLEYKLNDATEPSAITFGSEQTMNGKTPTVNDINVAKVTL…
NC96	804273	806220	-	8	8	TAAATTATTTCTGAATTAACTGTAAAAATGAACGAAACCTTTTGTTTTCC	GAAGAAGAAGAAGAAGAAGAAGAA	GTTCTTAGGAGTTCTGGGGTTTGGGGCTGGTTTGATCAGTGAAAATTAAG	VKRKNILKFVSLLGIGSFVMLAAASCTTPTPNPTPNPNPPSGGMNGGDTNPGDGQGMMNAASQELEAARMGLTTVFDSKAKNLGLYVDYKKTQQNLTKAYDAAKTVLDNSSSTTQNLNEAKTRLETAIRTAATSKQTFDEQHAELVKVYKELKTTLSNETATLAPYEEAQYAGIKMHLSGLYDSGKAITTKTLEPVEGDPLTADVVMMANTKIVEAIKDEVLNPQKENATKLADSFVKQVLVKEKITGVEEAHKKAQPANYSFVGYSVDITGTATGQTSIPNWDYAQRTIFTNGDEPRSVSNTPADGQTMVQPLSNVSWIYSLAGTGAKYTLEFTYYGPSTGYLYFPYKLVNTSDQMKLGLEYKLNDATEPSAITFGSEQTMNGKTPTVNDINVAKVTL…
NY01	783167	785114	-	8	10	TAAATTATTTCTGAATTAACTGTAAAAATGAACGAAACCTTTTGTTTTCC	GAAGAAGAAGAAGAAGAAGAAGAAGAAGAA	GTTCTTAGGAGTTCTGGGGTTTGGGGCTGGTTTGATCAGTGAAAATTAAG	VKRKNILKFVSLLGIGSFVMLAAASCTTPTPNPTPNPNPPSGGMNGGDTNPGDGQGMMNAASQELEAARMGLTTVFDSKAKNLGLYVDYKKTQQNLTKAYDAAKTVLDNSSSTTQNLNEAKTRLETAIRTAATSKQTFDEQHAELVKVYKELKTTLSNETATLAPYEEAQYAGIKMHLSGLYDSGKAITTKTLEPVEGDPLTADVVMMANTKIVEAIKDEVLNPQKENATKLADSFVKQVLVKEKITGVEEAHKKAQPANYSFVGYSVDITGTATGQTSIPNWDYAQRTIFTNGDEPRSVSNTPADGQTMVQPLSNVSWIYSLAGTGAKYTLEFTYYGPSTGYLYFPYKLVNTSDQMKLGLEYKLNDATEPSAITFGSEQTMNGKTPTVNDINVAKVTL…
Rhigh	485674	487609	+	8	5	AATCGTAGTTGTGGTTGAAGTATAAATATCAACAAAACCCTTTGTTTCTC	GAAGAAGAAGAAGAA	GTTCTTATGAGTTCTGGGGTTTGGGGCTGGTTTGATCAGTGAAAATTAAG	VKRKNILKFVSLLGIGSFVMLAAASCTTPTPNPNPPSGGMNGGDTNPGDGQGMMNAASQELAAARMGLTTVFDSKAKNLGLYVDYKKTQDTLTKAYDAAKTVLDNSSSTTQNLNEAKTRLETAIRTAATSKQTFDEQHAELVKVYEELKTTLSNETATLVPYAAAQYAGIKMHLSGLYDAGKAITTKTLEPVEGDPLTASAVMMANTKIVEAIKDEVLNPQKENATKLADSFVKQVLVKEKITGVEEAHNKSQPANYSFVGYSVDITGTANGQTSIPNWNYAQRTIFTNGDEPRSVSNTPVDGQTMAQPLSNVSWIYSLAGTGAKYTLEFTYYGPSTGYLYFPYKLVNTSDQVKLGLEYKLNDATKPSAITFGSEQTMNGKTPTVNDINVAKVTLANLN…
Rhigh	823704	825642	-	8	12	ATGAGTTGTGATGGTTTTAACTATAAAAACTGATAAAATCTTTTGTTTTC	GAAGAAGAAGAAGAAGAAGAAGAAGAAGAAGAAGAA	GTTCTTAGGAGTTCTGGGGTTTGGGGCTGGTTTGATCAGTGAAAATTAAG	VKRKNILKFVSLLGIGSFVMLAAASCTTPTPNPNPPSGGMNGGDTNPGDGQGMMNAASQELAAARMGLTTVFDSKAKNLGLYVDYKKTQDTLTKAYDAAKTVLDNSSSTTQNLNEAKTRLETAIRTAATSKQTFDEQHAELVKVYEELKTTLSNETATLAPYADSQYAGIKMHLSGLYDAGKAITTKTLEPVEGDPLTADVVMMANTKIVEAIKDEVLNPQKENATKLADSFVKQVLVKEKITGVEEAHNKAQPANYSFVGYSVDITGTVTGQTSIPNWDYAQRTIFTNGDEPRSISNTPADGQTMVQPLSNVSWIYSLAGTGAKYTLEFTYYGPSTGYLYFPYKLVNTSDQMKLGLEYKLNDATEPSAITFGSEQTMNGKTPTVNDINVAKVTLANLK…
Rlow	485760	487695	+	8	5	AATCGTAGTTGTGGTTGAAGTATAAATATCAACAAAACCCTTTGTTTCTC	GAAGAAGAAGAAGAA	GTTCTTATGAGTTCTGGGGTTTGGGGCTGGTTTGATCAGTGAAAATTAAG	VKRKNILKFVSLLGIGSFVMLAAASCTTPTPNPNPPSGGMNGGDTNPGDGQGMMNAASQELAAARMGLTTVFDSKAKNLGLYVDYKKTQDTLTKAYDAAKTVLDNSSSTTQNLNEAKTRLETAIRTAATSKQTFDEQHAELVKVYEELKTTLSNETATLVPYAAAQYAGIKMHLSGLYDAGKAITTKTLEPVEGDPLTASAVMMANTKIVEAIKDEVLNPQKENATKLADSFVKQVLVKEKITGVEEAHNKSQPANYSFVGYSVDITGTANGQTSIPNWNYAQRTIFTNGDEPRSVSNTPVDGQTMAQPLSNVSWIYSLAGTGAKYTLEFTYYGPSTGYLYFPYKLVNTSDQVKLGLEYKLNDATKPSAITFGSEQTMNGKTPTVNDINVAKVTLANLN…
Rlow	823898	825836	-	8	12	ATGAGTTGTGATGGTTTTAACTATAAAAACTGATAAAATCTTTTGTTTTC	GAAGAAGAAGAAGAAGAAGAAGAAGAAGAAGAAGAA	GTTCTTAGGAGTTCTGGGGTTTGGGGCTGGTTTGATCAGTGAAAATTAAG	VKRKNILKFVSLLGIGSFVMLAAASCTTPTPNPNPPSGGMNGGDTNPGDGQGMMNAASQELAAARMGLTTVFDSKAKNLGLYVDYKKTQDTLTKAYDAAKTVLDNSSSTTQNLNEAKTRLETAIRTAATSKQTFDEQHAELVKVYEELKTTLSNETATLAPYADSQYAGIKMHLSGLYDAGKAITTKTLEPVEGDPLTADVVMMANTKIVEAIKDEVLNPQKENATKLADSFVKQVLVKEKITGVEEAHNKAQPANYSFVGYSVDITGTVTGQTSIPNWDYAQRTIFTNGDEPRSISNTPADGQTMVQPLSNVSWIYSLAGTGAKYTLEFTYYGPSTGYLYFPYKLVNTSDQMKLGLEYKLNDATEPSAITFGSEQTMNGKTPTVNDINVAKVTLANLK…
S6	457642	459625	+	8	12	TAAATTATTTCTGAATTAACTATAAAAATGAATGAAACTTTTTGTTTTCC	GAAGAAGAAGAAGAAGAAGAAGAAGAAGAAGAAGAA	GTTCTTAGGAGTTCTGGGGTTTGGGGCTGGTTTGATCTGCGAAAATTAAG	VFNVSYWLNFKWRKKNILKFVSLLGIGSFVMLAAASCTTPTPNPTPNPNPPSGGMNGGDTNPGDGQGMMNAASQELAAARMGLTTIFDSKAKNLGLYVDYKKTQNTLTKAYDAAKTVLDNSSSTTQNLNEAKTRLETAIRTAATSKQTFDEQHAELVKVYKELKTTLSNETATLAPYADAQYAGIKMHLSGLYDAGKAITTKTLEPVEGDPLTASAVMMANTKIVEAIKDEVLNPQKENATKLADSFVKQVLVKEKITGVEEAHNKAQPANYSFVGYSVDITGTTTGQTSIPNWDYAQRTIFTNGDEPRSISNTPADGQTMAQPLSNVSWIYSLAGTGAKYTLEFTYYGPSTGYLYFPYKLVNTSDQVKLGLEYKLNDATKPSAITFGSEQTMNGKTPT…
S6	804441	806394	-	8	14	TAAATTGATTTCTGAACTAACTTTAAAAACATACAAAACCTTTATTTAGC	GAAGAAGAAGAAGAAGAAGAAGAAGAAGAAGAAGAAGAAGAA	GTTCTTAGGAGTTCTGGGGTTTTGGTTTGGCTTGATGAGCGAAAATAAAC	VKRKNILKFISLLGIGSFVMLAAASCTTPTPSPAPNPNPPSNGGMNGGNINPGDGQGMMNAAAQELAAARMGLTTVFDSKAKNLGLYVDYKKTQNTLTKAYDAAKTVLDNSSSTTQNLNEAKTRLETAIRTAATSKQTFDEQHAELVKVYKELKTTLSNETATLAPYADAQYAGIKMHLSGLYDAGKAITTKTLEPVEGDPLTAGAVTMANTKIVEAIKDEVLNPKKENATKLADSFVKQVLVKEKITGVEEAHNKAQPANYSFVGYSVDITGTANGQTSIPNWNYAQRTIFTNGDEPRSVSNTPVDGQTMAQPLSNVSWIYSLAGTGAKYTLEFTYYGPSTGYLYFPYKLVNTSDQMKLGLEYKLNDATEPSAITFGNEQTMNGKTPTVNDINVAKVT…
VA94	782145	784092	-	8	9	TAAATTATTTCTGAATTAACTGTAAAAATGAACGAAACCTTTTGTTTTCC	GAAGAAGAAGAAGAAGAAGAAGAAGAA	GTTCTTAGGAGTTCTGGGGTTTGGGGCTGGTTTGATCAGTGAAAATTAAG	VKRKNILKFVSLLGIGSFVMLAAASCTTPTPNPTPNPNPPSGGMNGGDTNPGDGQGMMNAASQELEAARMGLTTVFDSKAKNLGLYVDYKKTQQNLTKAYDAAKTVLDNSSSTTQNLNEAKTRLETAIRTAATSKQTFDEQHAELVKVYKELKTTLSNETATLAPYEEAQYAGIKMHLSGLYDSGKAITTKTLEPVEGDPLTADVVMMANTKIVEAIKDEVLNPQKENATKLADSFVKQVLVKEKITGVEEAHKKAQPANYSFVGYSVDITGTATGQTSIPNWDYAQRTIFTNGDEPRSVSNTPADGQTMVQPLSNVSWIYSLAGTGAKYTLEFTYYGPSTGYLYFPYKLVNTSDQMKLGLEYKLNDATEPSAITFGSEQTMNGKTPTVNDINVAKVTL…
W101	758050	759997	-	8	10	TAAATTATTTCTGAATTAACTGTAAAAATGAACGAAACCTTTTGTTTTCC	GAAGAAGAAGAAGAAGAAGAAGAAGAAGAA	GTTCTTAGGAGTTCTGGGGTTTGGGGCTGGTTTGATCAGTGAAAATTAAG	VKRKNILKFVSLLGIGSFVMLAAASCTTPTPNPTPNPNPPSGGMNGGDTNPGDGQGMMNAASQELEAARMGLTTVFDSKAKNLGLYVDYKKTQQNLTKAYDAAKTVLDNSSSTTQNLNEAKTRLETAIRTAATSKQTFDEQHAELVKVYKELKTTLSNETATLAPYEEAQYAGIKMHLSGLYDSGKAITTKTLEPVEGDPLTADVVMMANTKIVEAIKDEVLNPQKENATKLADSFVKQVLVKEKITGVEEAHKKAQPANYSFVGYSVDITGTATGQTSIPNWDYAQRTIFTNGDEPRSVSNTPADGQTMVQPLSNVSWIYSLAGTGAKYTLEFTYYGPSTGYLYFPYKLVNTSDQMKLGLEYKLNDATEPSAITFGSEQTMNGKTPTVNDINVAKVTL…
CA06	799642	801799	-	9	9	ATTGAGTTGTTGTATTTAATATATAAAATAGCTAAAATCCTTTAAAAATC	GAAGAAGAAGAAGAAGAAGAAGAAGAA	GTTCTTAGAAGTTTAGGAGTTAGCGGATGCTCTGATCAGCGAAAATAAAC	VKRKNILKFVSLLGIGSFVMLAAASCTQASTPTPTPTPTPTPTPTPTPTPNPEPKPDPMTPPSGGDMNNPLSGGMNGGDTNPGNGGGTDNAVQQLAAARKTLTDLLGTENTNVALYADYAKIQSTLSTAYMTAKTASENTSATLDNLRSASTTLQAAIDKAASDKRAFDSANQPLVTAYNQLKTTLQSKTTSLEGLSENKYSSIKNHLSKLFDTGSAITAKTLDPTMGTVPEVLPVTKANEDITTAVSKLTEWKTNADKFNEFVKNPLSKGKLSAGADSAHNQEQPANWSFAGYSVDLTTGSTGNSQNPLNWNFAQRKVWTSEGQQTGKTALVSSPVSATDVSWIYSLAGEGTKYTLTFEYYGPDNAFLYFPYKLVKQADSSSVALQYSLNKTSSKLIN…
MC06	775500	777585	-	9	5	ATTGAGTTGTTGTATTTAATATATAAAATAGCTAAAATCCTTTAAAAATC	GAAGAAGAAGAAGAA	GTTCTTAGAAGTTTAGGAGTTAGCGGATGCTCTGATCAGCGAAAATAAAC	VKRKNILKFVSLLGIGSFVMLAAASCTSATTPTPNPEPKPDPMPNPPSGGMNGGNTNPGNGGGTDNAVQQLAAARKTLTDLLGTENTNVALYADYAKIQSTLSTAYMTAKTASENTSATLDNLRSASTTLQAAIDKAASDKRAFDSANQSLVAAYNNLKTTLQSKTNSLEGLSENKYSSIKNHLSKLFDTGSEITARTLDPTSGERPTLEKVNEANNGIKMAISSESLNKWKTNADKFNDFEKNPLSKEKLESTNDTAHNQEQPANWSFAAYSVDLTSNSQNLPNWNFAQRKVWTSEGQEGGKTVLVSSPVSSTDVSWIYSLAGEGTKYTLSFEYYGPDTAFLYFPYKLVKQADSNSVALQYSLNKASPKLINFQPVRTEPANADSTTNETTTTGSSES…
NC08	770496	772596	-	9	12	ATTGAGTTGTTGTATTTAATATATAAAATAGCTAAAATCCTTTAAAAATC	GAAGAAGAAGAAGAAGAAGAAGAAGAAGAAGAAGAA	GTTCTTAGAAGTTTAGGAGTTAGCGGATGCTCTGATCGGCGAAAATAAAT	VKRKNILKFVSLLGIGSFVMLAAASCTSATTPTPNPEPKPDPMPNPPSGGMNGGDTNPGNGGGMMGDNPNPGNTTPKQQLAAARKTLTDLLGTENTNVALYADYAKIQSTLSTAYMTAKTASENTSATLDNLRSASTTLQAAIDKAASDKRAFDSANQPLVTAYNQLKTTLQSKTTSLEGLSENKYSSIKNHLSKLFDTGSAITARTLDPTSGERPTLEKVNEANNGIKMAISSESLNKWKTNADKFNDFEKNPLSKEKLESTNDTAHNQEQPANWSFAAYSVDLTSNSQNLPNWNFAQRKVWTSEGQETGKTALVSSPVSATDVSWIYSLAGEGTKYTLTFKYYGPDNAFLYFPYKLVKQADSNSVALQYSLNKASPKLINFEPAETVSTNTDQSENE…
NC95	776122	778249	-	9	11	ATTGAGTTGTTGTATTTAATATATAAAATAGCTAAAATCCTTTAAAAATC	GAAGAAGAAGAAGAAGAAGAAGAAGAAGAAGAA	GTTCTTAGAAGTTTAGGAGTTAGCGGATGCTCTGATCAGCGAAAATAAAC	VKRKNILKFVSLLGIGSFVMLAAASCTQASTPTPTPTPTPNPEPKPDPMTPPSGGDMNNPLSGGMNGGDTNPGNGGGTDNAVQQLAAARKTLTDLLGTENTNVALYADYAKIQSTLSTAYMTAKTASENTSATLDNLRSASTTLQAAIDKAASDKRAFDSANQPLVTAYNQLKTTLQSKTTSLEGLSENKYSSIKNHLSKLFDTGSAITAKTLDPTMGTVPEVLPVTKANEDITTAVSKLTEWKTNADKFNEFVKNPLSKGKLSAGADSAHNQEQPANWSFAGYSVDLTTGSTGNSQNPLNWNFAQRKVWTSEGQQTGKTALVSSPVSATDVSWIYSLAGEGTKYTLTFEYYGPDNAFLYFPYKLVKQADSSSVALQYSLNKTSSKLINFEPAETVSTN…
NC96	808984	811111	-	9	11	ATTGAGTTGTTGTATTTAATATATAAAATAGCTAAAATCCTTTAAAAATC	GAAGAAGAAGAAGAAGAAGAAGAAGAAGAAGAA	GTTCTTAGAAGTTTAGGAGTTAGCGGATGCTCTGATCAGCGAAAATAAAC	VKRKNILKFVSLLGIGSFVMLAAASCTQASTPTPTPTPTPNPEPKPDPMTPPSGGDMNNPLSGGMNGGDTNPGNGGGTDNAVQQLAAARKTLTDLLGTENTNVALYADYAKIQSTLSTAYMTAKTASENTSATLDNLRSASTTLQAAIDKAASDKRAFDSANQPLVTAYNQLKTTLQSKTTSLEGLSENKYSSIKNHLSKLFDTGSAITAKTLDPTMGTVPEVLPVTKANEDITTAVSKLTEWKTNADKFNEFVKNPLSKGKLSAGADSAHNQEQPANWSFAGYSVDLTTGSTGNSQNPLNWNFAQRKVWTSEGQQTGKTALVSSPVSATDVSWIYSLAGEGTKYTLTFEYYGPDNAFLYFPYKLVKQADSSSVALQYSLNKTSSKLINFEPAETVSTN…
Rhigh	828531	830658	-	9	9	GTAAATTATTTCTGAATTAACTGTAAAAACGAATGAAAGCTTTTGTTTTC	GAAGAAGAAGAAGAAGAAGAAGAAGAA	GTTCTTAGAAGTTTAGGAGTGTTGGATTGGCCTAGTGAGCGAAAATAAAC	VKRKNILKFVSLLGIGSFVMLAAASCTSAPAPAPAPAPTPTPNPEPNPMPNPGGGVGMSDGNTNPGNGGGMMGDNPNSGNTTPEQQLAAARKTLTDLLGTENTNVALYADYAKIQSTLSTAYMTAKTASENTSATLDNLRSASTTLQAAIDKAASDKRAFDSANQSLVAAYNNLKTTLQSKTNSLEGLSENKYSGIKNHVSKLFDTGSAITARTLDPTSGERPTLEKVNEANNGIKMAISSESLNKWKTNADKFNDFEKNPLSKEKLESTNDTAHNQEQPANWSFAAYSVDLTSNSQNLPNWNFAQRKVWTSEGQQTGKTALVSSPVSATDVSWIYSLAGEGTKYTLSFEYYGPDTAFLYFPYKLVKQADSSSVALQYSLNKTSSKLINFEPAETVSTN…
Rlow	828737	830864	-	9	9	GTAAATTATTTCTGAATTAACTGTAAAAACGAATGAAAGCTTTTGTTTTC	GAAGAAGAAGAAGAAGAAGAAGAAGAA	GTTCTTAGAAGTTTAGGAGTGTTGGATTGGCCTAGTGAGCGAAAATAAAC	VKRKNILKFVSLLGIGSFVMLAAASCTSAPAPAPAPAPTPTPNPEPNPMPNPGGGVGMSDGNTNPGNGGGMMGDNPNSGNTTPEQQLAAARKTLTDLLGTENTNVALYADYAKIQSTLSTAYMTAKTASENTSATLDNLRSASTTLQAAIDKAASDKRAFDSANQSLVAAYNNLKTTLQSKTNSLEGLSENKYSGIKNHVSKLFDTGSAITARTLDPTSGERPTLEKVNEANNGIKMAISSESLNKWKTNADKFNDFEKNPLSKEKLESTNDTAHNQEQPANWSFAAYSVDLTSNSQNLPNWNFAQRKVWTSEGQQTGKTALVSSPVSATDVSWIYSLAGEGTKYTLSFEYYGPDTAFLYFPYKLVKQADSSSVALQYSLNKTSSKLINFEPAETVSTN…
S6	459965	462074	+	9	11	AAAACATTTCTCTGAATTTGCTACAAAAATTAGTGAAACCTTTTATTTTC	GAAGAAGAAGAAGAAGAAGAAGAAGAAGAAGAA	GTTCTTAGGAGTTCTGGGGTTTAGGGCTGGTCTGATCGGCGAAAATAAAC	VKRKNILKFVSLLGIGSFVMLAAASCTTPVNPTPNPTPTPNPEPNPGGGGGMSDGNTNPGNGGGMMGDNPNPGNTTPEQQLAAARKTLTDLLGTENTNVALYADYAKIQSTLSTAYMTAKTASENTSATLENLRSASTTLQAAIDKAANDKRVFDSVNQPLVAAYNNLKTTLKSKTTSLEGLSENKYGGIKNHLSKLFDTGSAITAKTLDPTSGERPTLEKVNEANNGIKMAISPESLKKWKGNADKFNEFEKNPLSKEKLKSTSDTAHNQEQPANWSFAAYSVDLTSNSQNLPNWNFAQRKVWTSENQQPGKTALVSSPVSATDVSWIYSLAGEGTKYTLTFEYYGPDNAFLYFPYKLVKAADSSSVALQYSLNKTSSKLINFKPAETVSTNTDQSEN…
S6	808983	811068	-	9	10	AATTGTAGATTTGGTTTTAATATAAATATCGATAAAACCTTTTGTTTTCC	GAAGAAGAAGAAGAAGAAGAAGAAGAAGAA	GTTCTTAGGAGTTCGGGGAGTTTAGCCTGGCTCGATCGGCGAAAATTAAG	VKRKNILKFVSLLGIGSFVMLAAVSCTSATTPTPNPEPNPNPEPKPDPMPNPPSGGMNGRDTNPGNDGGMENSAQQLAAARKTLTDLLGTENTNVALYADYANIQSTLSTAYMTAKTASENTSATLDNLRSASTTLQAAIDKAASDKRAFDSANQSLVAAYNNLKTTLQSKTNSLEGLSENKYSGIKNHVSKLFDTGSAITARTLDPTSGERPALEKVNEANNGIKMAISPESLKKWKTNADKFNDFEKNPLSKEKLESTNDTAHNQEQPANWSFAAYSVDLTSNSQNLPNWNFAQRKVWTSEGQQGGRTVLVSSTDVSWIYSLAGEGTKYTLSFEYYGPDTAFLYFPYKLVKQADSSSVALQYSLNKTSSKLINFEPAKTMPTNADQSENGVATTSTT…
VA94	786841	788968	-	9	10	ATTGAGTTGTTGTATTTAATATATAAAATAGCTAAAATCCTTTAAAAATC	GAAGAAGAAGAAGAAGAAGAAGAAGAAGAA	GTTCTTAGAAGTTTAGGAGTTAGCGGATGCTCTGATCAGCGAAAATAAAC	VKRKNILKFVSLLGIGSFVMLAAASCTQASTPTPTPTPTPNPEPKPDPMTPPSGGDMNNPLSGGMNGGDTNPGNGGGTDNAVQQLAAARKTLTDLLGTENTNVALYADYAKIQSTLSTAYMTAKTASENTSATLDNLRSASTTLQAAIDKAASDKRAFDSANQPLVTAYNQLKTTLQSKTTSLEGLSENKYSSIKNHLSKLFDTGSAITAKTLDPTMGTVPEVLPVTKANEDITTAVSKLTEWKTNADKFNEFVKNPLSKGKLSAGADSAHNQEQPANWSFAGYSVDLTTGSTGNSQNPLNWNFAQRKVWTSEGQQTGKTALVSSPVSATDVSWIYSLAGEGTKYTLTFEYYGPDNAFLYFPYKLVKQADSSSVALQYSLNKTSSKLINFEPAETVSTN…
CA06	465755	467945	+	10	10	ATAAATTATTTCTGAATCAACTGTAAAAACGAACGAAACCCTTTGTTTTC	GAAGAAGAAGAAGAAGAAGAAGAAGAAGAA	GTTCTTAGGAGTTCTGGGGTTTTCGTTTGGTCTGATCGGCGAAAATAAAC	VKRKNILKFVSLLGIGSFVMLAAASCTTPVNPTPNPKPTPNPEPKPDPMPNPPSGGMNGGDTNPGDGQGMMDSAAQELTAARTALTSLLASKNANVQMYSDYAKIKNDLTAAYTSAETASQNQAATLEQVKSATSTLQTAINTAVNEKKVFDENNSELVTAYTNLKTTLEGENTTLAAFNDSANYGGIKTHLMSLYNQAKTITTSTLLNDARQSPNKDNVVKINKEITDAINPTLLNQQKANADMLATSFTKQVLNDTQLTSGSSETSMQTQPQPGNYSFVGYSVDVTTGSNNARPNWNFAQRKVWDTNKAPLTQTEQSNKLTNVSWIYNLSGMGAKYTVTFDYYGASNNAYLYFPYKLVQTNDKVALQYSLNGIAPKAIEFKAAAATQAVPAQEGASA…
NC96	471163	473353	+	10	9	ATAAATTATTTCTGAATCAACTGTAAAAACGAACGAAACCCTTTGTTTTC	GAAGAAGAAGAAGAAGAAGAAGAAGAA	GTTCTTAGGAGTTCTGGGGTTTTCGTTTGGTCTGATCGGCGAAAATAAAC	VKRKNILKFVSLLGIGSFVMLAAASCTTPVNPTPNPKPTPNPEPKPDPMPNPPSGGMNGGDTNPGDGQGMMDSAAQELTAARTALTSLLASKNANVQMYSDYAKIKNDLTAAYTSAETASQNQAATLEQVKSATSTLQTAINTAVNEKKVFDENNSELVTAYTNLKTTLEGENTTLAAFNDSANYGGIKTHLMSLYNQAKTITTSTLLNDARQSPNKDNVVKINKEITDAINPTLLNQQKANADMLATSFTKQVLNDTQLTSGSSETSMQTQPQPGNYSFVGYSVDVTTGSNNARPNWNFAQRKVWDTNKAPLTQTEQSNKLTNVSWIYNLSGMGAKYTVTFDYYGASNNAYLYFPYKLVQTNDKVALQYSLNGIAPKAIEFKAAAATQAVPAQEGASA…
Rhigh	502397	504434	+	10	7	ATTGAGTTGTTGTATTTAATATATAAAATAGCTAAAATCCTTTAAAAATC	GAAGAAGAAGAAGAAGAAGAA	GTTCTTAGGAGTTCGGGGAGTTCGGGGAGTTTGGTCTGACTTGATCTGCG	VKRKNILKFVSLLGIGSFVMLAAASCTSATTPTPNPEPKPDPMPNPPSGGMNGGDTNPGNSGEMDNSAQQLSTAKTALTNLLSSKNTNVQMYSDYAKIKSDLTAAYTSAEATSQNSSATLEQVKSATSTLQTAINTAANEKKVFDENNSELVTAYTNLKTTLEGENTTLAAFNDSANYGGIKTHLMSLYNQAKTITTSTLLNDAGQSPNKDNVVKINKEITDSINPTLLNQQKANADMLATSFTKQVLNDAQLTSGSSETSMQTQPQPGNYSFVGYSVDVTTGSNNARPNWNFAQRKVWDTNKAPLTQTEQSNKLTDVSWIYNLSGMGAKYTVTFDYYGASNNAYLYFPYKLVQANDNVGLQYVLNNTTPKLVNFATAQPTASSAEPSQVQPAAEMMAL…
Rlow	502531	504568	+	10	7	ATTGAGTTGTTGTATTTAATATATAAAATAGCTAAAATCCTTTAAAAATC	GAAGAAGAAGAAGAAGAAGAA	GTTCTTAGGAGTTCGGGGAGTTCGGGGAGTTTGGTCTGACTTGATCTGCG	VKRKNILKFVSLLGIGSFVMLAAASCTSATTPTPNPEPKPDPMPNPPSGGMNGGDTNPGNSGEMDNSAQQLSTAKTALTNLLSSKNTNVQMYSDYAKIKSDLTAAYTSAEATSQNSSATLEQVKSATSTLQTAINTAANEKKVFDENNSELVTAYTNLKTTLEGENTTLAAFNDSANYGGIKTHLMSLYNQAKTITTSTLLNDAGQSPNKDNVVKINKEITDSINPTLLNQQKANADMLATSFTKQVLNDAQLTSGSSETSMQTQPQPGNYSFVGYSVDVTTGSNNARPNWNFAQRKVWDTNKAPLTQTEQSNKLTDVSWIYNLSGMGAKYTVTFDYYGASNNAYLYFPYKLVQANDNVGLQYVLNNTTPKLVNFATAQPTASSAEPSQVQPAAEMMAL…
S6	464867	466910	+	10	14	ATAAATTATTTCTGAATTAACTGTAAAAACGAACTAAACCCTTTGTTTTC	GAAGAAGAAGAAGAAGAAGAAGAAGAAGAAGAAGAAGAAGAA	GTTCTTAGGAGTTCGGGGGTTTTCGTTTGGTCTGATCAGCGAAAATAAAC	VKRKNILKFVSLLGIGSFVMLAAASCTSTTTPTPNHEPKPNPAPKPDPKPNPGGGMMGGMNGGDTNPGNSGEMDNSAQQLSTAKTALTNLLSSKNTNVQMYSDYAKIKSDLTAAYTSASQNQAATLEQVKNAASTLQTAINTAVNEKKVFDENNSELVTAYTNLKTTLEGENTTLAAFNDSANYGGIKTHLLSLYNQAKTITTSTLLNDAGQSPNKDNVVKINKEITDAINPTLLNQQKANADMLATSFTKQVLNDAQLTSGSSETSMQTQPQPGNYSFVGYSVDVTTGSNNARPNWNFAQRKVWDTNRAPLAQTEQSNKLTDVSWIYSLSGMGAKYTVTFDYYGASNNAYLYFPYKLVQTNDNVGLQYVLNNTTPKLVNFATVQPTASSAEPSQVQPA…
CA06	561305	563312	-	12	8	GAATTTAATTGTGGATTAACTACAAAAACATATAAAAACCTTTTGTTTTC	GAAGAAGAAGAAGAAGAAGAAGAA	GTTCTTAGAAGTTTAGAGGTTTGGGGTTGGTCTGATCGGCGAAAATAAAC	VKRKNILKFVSLLGIGSFVMLAAASCTSATTPTPNPEPKPTPNPEPKPDPMPNPPSGGMNGGDTNPGNGGGMDNSAQQLSTAKTALTNLLSSKNTNVQMYSDYAKIKNDLTAAYTTAKSTSDNTSATLEQVKSATSTLQAAIDKAASDKKTFDDQNSDLVTAYKELKSNVNNKDNNLMGLDSTQYSAIRTNLEGYYTTGADFVKKTLIPVEGMSPTKDEVTNLNTNINASVADLGSRKENADMYFNKFGKKVLVKNGVVAPKPMMADGVQTEHETPTDNSQPVNYSFVGYSVDVNGSGSTPPAWDYVKRTVFNINGTLVDNQNGDANTAPLTDVSWIYSLNNGSKYTLSFTYYGPTTAYLYFPYKLVQSSQSTTVGLNYSLNGTEAKSVEFTAPTTMNP…
F	502115	504104	+	12	13	ATAAATTATTTCTGAATCAGCTGTAAAAAAGAACGGAACCCTTTGTTTTC	GAAGAAGAAGAAGAAGAAGAAGAAGAAGAAGAAGAAGAA	GATCTTAGAAGTTCTTAAGTTTGGGTCTCGTCTGATCGGTGAAAATTAAG	VKRKNILKFVSLFGIGSFVMLAAASCTSPVNPTPNPTPELKPDPMSNPPSGGMNGGDTNPGNSGVMDNAAQQLAAARTVLTSLLASKNANVEMYSDYAKIKNDLTAAYTTAKSTSDNTSATLEQVKSATSTLQTAIDKAASDKKTFDDQNSDLVTAYKELKSNVNNKDNNLMGLDSTQYSAIRTNLEGYYTIGADVVKKTLVPVEGMSPTKDEVTNLNTNINASVADLGSRKENADMYFNKFGKKVLVKSGVVAPKPMMADGVQTEHETPTDNSQPVNYSFVGYSVDVNGSGSTPPAWDYVKRTVFNINGTLVDNQNGDANTAPLTDVSWIYSLNNGSKYTVSFTYYGPTTAYLYFPYKLVQSSQSTTVGLNYSLNGTEAKSVEFTAPTTMNPEGMDSP…
MC06	532352	534359	-	12	14	GAATTTAATTGTGGATTAACTACAAAAACATATAAAAACCTTTTGTTTTC	GAAGAAGAAGAAGAAGAAGAAGAAGAAGAAGAAGAAGAAGAA	GTTCTTAGAAGTTTAGAGGTTTGGGGTTGGTCTGATCGGCGAAAATAAAC	VKRKNILKFVSLLGIGSFVMLAAASCTSATTPTPNPEPKPTPNPEPKPDPMPNPPSGGMNGGDTNPGNGGGMDNSAQQLSTAKTALTNLLSSKNTNVQMYSDYAKIKNDLTAAYTTAKSTSDNTSATLEQVKSATSTLQAAIDKAASDKKTFDDQNSDLVTAYKELKSNVNNKDNNLMGLDSTQYSAIRTNLEGYYTTGADFVKKTLIPVEGMSPTKDEVTNLNTNINASVADLGSRKENADMYFNKFGKKVLVKNGVVAPKPMMADGVQTEHETPTDNSQPVNYSFVGYSVDVNGSGSTPPAWDYVKRTVFNINGTLVDNQNGDANTAPLTDVSWIYSLNNGSKYTLSFTYYGPTTAYLYFPYKLVQSSQSTTVGLNYSLNGTEAKSVEFTAPTTMNP…
NC08	532333	534364	-	12	8	GAATTTAATTGTGGATTAACTACAAAAACATATAAAAACCTTTTGTTTTC	GAAGAAGAAGAAGAAGAAGAAGAA	GTTCTTAGAAGTTTAGAGGTTTGGGGTTGGTCTGATCGGCGAAAATAAAC	VKRKNILKFVSLLGIGSFVMLAAASCTSATTPTPNPEPKPTPNPEPKPTPNPEPKPDPMPNPPSGGMNGGDTNPGNGGGMDNSAQQLSTAKTALTNLLSSKNTNVQMYSDYAKIKNDLTAAYTTAKSTSDNTSATLEQVKSATSTLQAAIDKAASDKKTFDDQNSDLVTAYKELKSNVNNKDNNLMGLDSTQYSAIRTNLEGYYTTGADFVKKTLIPVEGMSPTKDEVTNLNTNINASVADLGSRKENADMYFNKFGKKVLVKNGVVAPKPMMADGVQTEHETPTDNSQPVNYSFVGYSVDVNGSGSTPPAWDYVKRTVFNINGTLVDNQNGDANTAPLTDVSWIYSLNNGSKYTLSFTYYGPTTAYLYFPYKLVQSSQSTTVGLNYSLNGTEAKSVEF…
NC95	537546	539553	-	12	10	GAATTTAATTGTGGATTAACTACAAAAACATATAAAAACCTTTTGTTTTC	GAAGAAGAAGAAGAAGAAGAAGAAGAAGAA	GTTCTTAGAAGTTTAGAGGTTTGGGGTTGGTCTGATCGGCGAAAATAAAC	VKRKNILKFVSLLGIGSFVMLAAASCTSATTPTPNPEPKPTPNPEPKPDPMPNPPSGGMNGGDTNPGNGGGMDNSAQQLSTAKTALTNLLSSKNTNVQMYSDYAKIKNDLTAAYTTAKSTSDNTSATLEQVKSATSTLQAAIDKAASDKKTFDDQNSDLVTAYKELKSNVNNKDNNLMGLDSTQYSAIRTNLEGYYTTGADFVKKTLIPVEGMSPTKDEVTNLNTNINASVADLGSRKENADMYFNKFGKKVLVKNGVVAPKPMMADGVQTEHETPTDNSQPVNYSFVGYSVDVNGSGSTPPAWDYVKRTVFNINGTLVDNQNGDANTAPLTDVSWIYSLNNGSKYTLSFTYYGPTTAYLYFPYKLVQSSQSTTVGLNYSLNGTEAKSVEFTAPTTMNP…
NC96	566716	568723	-	12	16	GAATTTAATTGTGGATTAACTACAAAAACATATAAAAACCTTTTGTTTTC	GAAGAAGAAGAAGAAGAAGAAGAAGAAGAAGAAGAAGAAGAAGAAGAA	GTTCTTAGAAGTTTAGAGGTTTGGGGTTGGTCTGATCGGCGAAAATAAAC	VKRKNILKFVSLLGIGSFVMLAAASCTSATTPTPNPEPKPTPNPEPKPDPMPNPPSGGMNGGDTNPGNGGGMDNSAQQLSTAKTALTNLLSSKNTNVQMYSDYAKIKNDLTAAYTTAKSTSDNTSATLEQVKSATSTLQAAIDKAASDKKTFDDQNSDLVTAYKELKSNVNNKDNNLMGLDSTQYSAIRTNLEGYYTTGADFVKKTLIPVEGMSPTKDEVTNLNTNINASVADLGSRKENADMYFNKFGKKVLVKNGVVAPKPMMADGVQTEHETPTDNSQPVNYSFVGYSVDVNGSGSTPPAWDYVKRTVFNINGTLVDNQNGDANTAPLTDVSWIYSLNNGSKYTLSFTYYGPTTAYLYFPYKLVQSSQSTTVGLNYSLNGTEAKSVEFTAPTTMNP…
NY01	542729	544739	-	12	15	ATTTAGTTGTTGTATTCACTATATAAAATGGCTAAAAACCTTTAAACATC	GAAGAAGAAGAAGAAGAAGAAGAAGAAGAAGAAGAAGAAGAAGAA	GTTCTTAGAAGTTTTAAGTTTTCAGGCTGTTTTTATGGATGACAATTAAG	VKRKNILKFVSLLGIGSFVMLAAASCTSATTPTPNPEPKPNPAPKPDPMPNPGGGMMGGMNGGNTNPGNGGGTDNAAQQLAAAKKELSDLLATQNSNLSTYADYANIQNTITAAYTTAKSTSDNTSATLEQVKSATSTLQAAIDKAASDKKTFDDQNSDLVTAYKELKSNVNNKDNNLMGLDSTQYSAIRTNLEGYYTTGADFVKKTLIPVEGMSPTKDEVTNLNTNINASVADLGSRKENADMYFNKFGKKVLVKNGVVAPKPMMADGVQTEHETPTDNSQPVNYSFVGYSVDVNGSGSTPPAWDYVKRTVFNINGTLVDNQNGDANTAPLTDVSWIYSLNNGSKYTLSFTYYGPTTAYLYFPYKLVQSSQSTTVGLNYSLNGTEAKSVEFTAPTTMN…
Rhigh	592634	594635	-	12	10	AAATGTAGATCTGGTTTAGATATAAATATTTACAGAATTCTTTTATTTTC	GAAGAAGAAGAAGAAGAAGAAGAAGAAGAA	GTTTAGGAGTGTCGGGTTGAGCTAGTGAGCGAAAATAAACCCGATTTATT	VKRKNILKFVSLLGIGSFVMLAAASCTSTATPTPNPEPKPNPKPEPKPDPMPNPPSGGMNGGDTNPGGGQNMMDAAAQELTAAKKVLSDLIGEESKTVELYADYAKIKADLTSAYTVAKTTSDSLTSTLDQVKTATSTLDNAIKTASTDKKTFDDQNSDLVTAYKELKSNVNNKDNNLMGLDSTQYSAIRTNLEGYYTIGADVVKKTLVPVEGMSPTKDEVTNLNTNINASVADLGSRKENADMYFNKFGKKVLVKSGVVAPKPMMADGVQTEHETPTDNSQPVNYSFVGYSVDVNGSGSTLPAWDYVKRTVFNINGTLVDNQNGDANTAPLTDVSWIYSLNNGSKYTVSFTYYGPTTAYLYFPYKLVQSSQSTTVGLNYSLNGTEAKSVEFTAPTTMN…
Rlow	592768	594769	-	12	11	AAATGTAGATCTGGTTTAGATATAAATATTTACAGAATTCTTTTATTTTC	GAAGAAGAAGAAGAAGAAGAAGAAGAAGAAGAA	GTTTAGGAGTGTCGGGTTGAGCTAGTGAGCGAAAATAAACCCGATTTATT	VKRKNILKFVSLLGIGSFVMLAAASCTSTATPTPNPEPKPNPKPEPKPDPMPNPPSGGMNGGDTNPGGGQNMMDAAAQELTAAKKVLSDLIGEESKTVELYADYAKIKADLTSAYTVAKTTSDSLTSTLDQVKTATSTLDNAIKTASTDKKTFDDQNSDLVTAYKELKSNVNNKDNNLMGLDSTQYSAIRTNLEGYYTIGADVVKKTLVPVEGMSPTKDEVTNLNTNINASVADLGSRKENADMYFNKFGKKVLVKSGVVAPKPMMADGVQTEHETPTDNSQPVNYSFVGYSVDVNGSGSTLPAWDYVKRTVFNINGTLVDNQNGDANTAPLTDVSWIYSLNNGSKYTVSFTYYGPTTAYLYFPYKLVQSSQSTTVGLNYSLNGTEAKSVEFTAPTTMN…
S6	567664	569698	-	12	10	ATTGAGTTGTTGTATTTAATATATAAAATAGCTAAAATCCTTTAAAAATC	GAAGAAGAAGAAGAAGAAGAAGAAGAAGAA	GTTCTTAGGAGTTCTGGGGTTTTCGTTTGGTTGATCGGCGAAAATAAATC	VKRKNILKFVSLLGIGSFVMLAAASCTTATTPTPNPAPKPNPNPEPKPNPAPKPDPMPNPGGGMMGGMNGGNTNPGNGGGTDNAVQQLAAAKKELSDLLATQNSNLSTYADYANIQNTLTAAYTTAKSTSDNTSATLEQVKSATSTLQTAIDKAASDKKTFDDQNSDLVTAYKELKSNVNNKDNNLMGLDSTQYSAIRTNLEGYYTIGADVVKKTLVPVEGMSPTKDEVTNLNTNINASVADLGSRKENADMYFNKFGKKVLVKSGVVAPKPMMAVGVQTEHETPTDNSQPVNYSFVGYSVDVNGSGSTPPAWDYVKRTVFNINGTLVDNQNGDANTAPLTDVSWIYSLNNGSKYTVSFTYYGPTTAYLYFPYKLVQSSQSTTVGLNYSLNGTEAKSVE…
VA94	548313	550320	-	12	9	GAATTTAATTGTGGATTAACTACAAAAACATATAAAAACCTTTTGTTTTC	GAAGAAGAAGAAGAAGAAGAAGAAGAA	GTTCTTAGAAGTTTAGAGGTTTGGGGTTGGTCTGATCGGCGAAAATAAAC	VKRKNILKFVSLLGIGSFVMLAAASCTSATTPTPNPEPKPTPNPEPKPDPMPNPPSGGMNGGDTNPGNGGGMDNSAQQLSTAKTALTNLLSSKNTNVQMYSDYAKIKNDLTAAYTTAKSTSDNTSATLEQVKSATSTLQAAIDKAASDKKTFDDQNSDLVTAYKELKSNVNNKDNNLMGLDSTQYSAIRTNLEGYYTTGADFVKKTLIPVEGMSPTKDEVTNLNTNINASVADLGSRKENADMYFNKFGKKVLVKNGVVAPKPMMADGVQTEHETPTDNSQPVNYSFVGYSVDVNGSGSTPPAWDYVKRTVFNINGTLVDNQNGDANTAPLTDVSWIYSLNNGSKYTLSFTYYGPTTAYLYFPYKLVQSSQSTTVGLNYSLNGTEAKSVEFTAPTTMNP…
W101	529263	531270	-	12	12	GAATTTAATTGTGGATTAACTACAAAAACATATAAAAACCTTTTGTTTTC	GAAGAAGAAGAAGAAGAAGAAGAAGAAGAAGAAGAA	GTTCTTAGAAGTTTAGAGGTTTGGGGTTGGTCTGATCGGCGAAAATAAAC	VKRKNILKFVSLLGIGSFVMLAAASCTSATTPTPNPEPKPTPNPEPKPDPMPNPPSGGMNGGDTNPGNGGGMDNSAQQLSTAKTALTNLLSSKNTNVQMYSDYAKIKNDLTAAYTTAKSTSDNTSATLEQVKSATSTLQAAIDKAASDKKTFDDQNSDLVTAYKELKSNVNNKDNNLMGLDSTQYSAIRTNLEGYYTTGADFVKKTLIPVEGMSPTKDEVTNLNTNINASVADLGSRKENADMYFNKFGKKVLVKNGVVAPKPMMADGVQTEHETPTDNSQPVNYSFVGYSVDVNGSGSTPPAWDYVKRTVFNINGTLVDNQNGDANTAPLTDVSWIYSLNNGSKYTLSFTYYGPTTAYLYFPYKLVQSSQSTTVGLNYSLNGTEAKSVEFTAPTTMNP…
CA06	263005	265096	+	13	6	GTAAATTATTTCTGAATTAACTATAAAAACTCACAAAATCTTTTGTTTTC	GAAGAAGAAGAAGAAGAA	GTTCTTAGGAGTTCTGGGGTTTGGGGCTGGTCTGATCGACGAAAATAAAC	VKRKNILKFVSLLGIGSFVMLAAASCTSATTPTPNPEPKPTPNPEPNPNPEPKPDPMPNPPSGGTNGGNTNPGNGGGTDNAAHQLAAAKKELSDLLATQNSNLSTYADYAKIQNTLTSAYTTAKSTSDNTSATLEQVKSATSTLQTAIDSAASEKKTFDAANPELIKFYNNLKTELQSKTTNLESLNDPQYSGIKDNLNSLYNSASEIVNKTLIPTTGNGLMRTDVEKVNTELMGAVNKLSERKTKADNYFNSFDKNVLSQSKLTSASTSQNNNQQPGNYSFVGFSTDVNGFLNTSDNNTPKWNFAQRRVWASENTPLATTPAEDETQQATPLTDVSWIYSLAGTEAKYTLTFDYFGPSTAYLYFPYKLVNTNDKAGLQYKLNNNTEPKLIEFMPAPNG…
CA06	566037	568122	-	13	14	ATATATTATTTCTGAATCAACTGTAAAAGCGAACGGAACCCTTTGTTTTC	GAAGAAGAAGAAGAAGAAGAAGAAGAAGAAGAAGAAGAAGAA	GTTCTTAGGAGTTCTGGGGTTTTCGTTTGGTCTGATCAGCGAAAATAAAC	VKRKNILKFVSLLGIGSFVMLAAASCTSATTPTPDTEPKPTPNPEPKPNPGGGDMNNPPSGGMNGRDTNPGNDGGTDNAAHQLAAAKKELSDLLATQNSNLSTYADYAKIQNTLTSAYTTAKSTSDNTSATLEQVKSATSTLQTAIDAAASEKKTFDAANPELIKFYNNLKTELQSKTTNLESLNDPQYSGIKDNLNSLYNSASKIVNKTLIPATGNGLMRTDVEKVNTELMGAVNKLSERKTNADNYFKSFDKNVLSQSKLTSASTSQNNNQQPGNYSFVGFSTDVNGFLNTSDNNTPKWNFAQRRVWESENTALTTSTTTGQNQQATPLTDVSWIYSLAETEAKYTLTFDYFGPSTAYLYFPYKLVNTNDKAGLQYKLNNNTEPKLIEFIPAPNGTS…
MC06	263443	265534	+	13	4	GTAAATTATTTCTGAATTAACTATAAAAACTCACAAAATCTTTTGTTTTC	GAAGAAGAAGAA	GTTCTTAGGAGTTCTGGGGTTTGGGGCTGGTCTGATCGACGAAAATAAAC	VKRKNILKFVSLLGIGSFVMLAAASCTSATTPTPNPEPKPTPNPEPNPNPEPKPDPMPNPPSGGTNGGNTNPGNGGGTDNAAHQLAAAKKELSDLLATQNSNLASYADYAKIQNTLTSAYTTAKSTSDNTSATLEQVKSATSTLQTAIDSAASEKKTFDAANPELIKFYNNLKTELQSKTTNLESLNDPQYSGIKDNLNSLYNSASEIVNKTLIPATGNGLMRTDVEKVNTELMGAVNKLSERKTKADNYFNSFDKNVLSQSKLTSASTSQNNNQQPGNYSFVGFSTDVNGFLNTSDNNTPKWNFAQRRVWASENTPLATTPAEDETQQATPLTDVSWIYSLAGTEAKYTLTFDYFGPSTAYLYFPYKLVNTNDKAGLQYKLNNNTEPKLIEFMPAPNG…
NC08	263444	265535	+	13	7	GTAAATTATTTCTGAATTAACTATAAAAACTCACAAAATCTTTTGTTTTC	GAAGAAGAAGAAGAAGAAGAA	GTTCTTAGGAGTTCTGGGGTTTGGGGCTGGTCTGATCGACGAAAATAAAC	VKRKNILKFVSLLGIGSFVMLAAASCTSATTPTPNPEPKPTPNPEPNPNPEPKPDPMPNPPSGGTNGGNTNPGNGGGTDNAAHQLAAAKKELSDLLATQNSNLSTYADYAKIQNTLTSAYTTAKSTSDNTSATLEQVKSATSTLQTAIDSAASEKKTFDAANPELIKFYNNLKTELQSKTTNLESLNDPQYSGIKDNLNSLYNSASEIVNKTLIPTTGNGLMRTDVEKVNTELMGAVNKLSERKTKADNYFNSFDKNVLSQSKLTSASTSQNNNQQPGNYSFVGFSTDVNGFLNTSDNNTPKWNFAQRRVWASENTPLATTPAEDETQQATPLTDVSWIYSLAGTEAKYTLTFDYFGPSTAYLYFPYKLVNTNDKAGLQYKLNNNTEPKLIEFMPAPNG…
NC08	537107	539192	-	13	14	ATATATTATTTCTGAATCAACTGTAAAAGCGAACGGAACCCTTTGTTTTC	GAAGAAGAAGAAGAAGAAGAAGAAGAAGAAGAAGAAGAAGAA	GTTCTTAGGAGTTCTGGGGTTTTCGTTTGGTCTGATCAGCGAAAATAAAC	VKRKNILKFVSLLGIGSFVMLAAASCTSATTPTPDTEPKPTPNPEPKPNPGGGDMNNPPSGGMNGRDTNPGNDGGTDNAAHQLAAAKKELSDLLATQNSNLSTYADYAKIQNTLTSAYTTAKSTSDNTSATLEQVKSATSTLQTAIDAAASEKKTFDAANPELIKFYNNLKTELQSKTTNLESLNDPQYSGIKDNLNSLYNSASKIVNKTLIPATGNGLMRTDVEKVNTELMGAVNKLSERKTNADNYFKSFDKNVLSQSKLTSASTSQNNNQQPGNYSFVGFSTDVNGFLNTSDNNTPKWNFAQRRVWESENTALTTSTTTGQNQQATPLTDVSWIYSLAETEAKYTLTFDYFGPSTAYLYFPYKLVNTNDKAGLQYKLNNNTEPKLIEFIPAPNGTS…
NC95	268424	270515	+	13	6	GTAAATTATTTCTGAATTAACTATAAAAACTCACAAAATCTTTTGTTTTC	GAAGAAGAAGAAGAAGAA	GTTCTTAGGAGTTCTGGGGTTTGGGGCTGGTCTGATCGACGAAAATAAAC	VKRKNILKFVSLLGIGSFVMLAAASCTSATTPTPNPEPKPTPNPEPNPNPEPKPDPMPNPPSGGTNGGNTNPGNGGGTDNAAHQLAAAKKELSDLLATQNSNLSTYADYAKIQNTLTSAYTTAKSTSDNTSATLEQVKSATSTLQTAIDSAASEKKTFDAANPELIKFYNNLKTELQSKTTNLESLNDPQYSGIKDNLNSLYNSASEIVNKTLIPTTGNGLMRTDVEKVNTELMGAVNKLSERKTKADNYFNSFDKNVLSQSKLTSASTSQNNNQQPGNYSFVGFSTDVNGFLNTSDNNTPKWNFAQRRVWASENTPLATTPAEDETQQATPLTDVSWIYSLAGTEAKYTLTFDYFGPSTAYLYFPYKLVNTNDKAGLQYKLNNNTEPKLIEFMPAPNG…
NC95	542275	544360	-	13	14	ATATATTATTTCTGAATCAACTGTAAAAGCGAACGGAACCCTTTGTTTTC	GAAGAAGAAGAAGAAGAAGAAGAAGAAGAAGAAGAAGAAGAA	GTTCTTAGGAGTTCTGGGGTTTTCGTTTGGTCTGATCAGCGAAAATAAAC	VKRKNILKFVSLLGIGSFVMLAAASCTSATTPTPDTEPKPTPNPEPKPNPGGGDMNNPPSGGMNGRDTNPGNDGGTDNAAHQLAAAKKELSDLLATQNSNLSTYADYAKIQNTLTSAYTTAKSTSDNTSATLEQVKSATSTLQTAIDAAASEKKTFDAANPELIKFYNNLKTELQSKTTNLESLNDPQYSGIKDNLNSLYNSASKIVNKTLIPATGNGLMRTDVEKVNTELMGAVNKLSERKTNADNYFKSFDKNVLSQSKLTSASTSQNNNQQPGNYSFVGFSTDVNGFLNTSDNNTPKWNFAQRRVWESENTALTTSTTTGQNQQATPLTDVSWIYSLAETEAKYTLTFDYFGPSTAYLYFPYKLVNTNDKAGLQYKLNNNTEPKLIEFIPAPNGTS…
NC96	268420	270511	+	13	8	GTAAATTATTTCTGAATTAACTATAAAAACTCACAAAATCTTTTGTTTTC	GAAGAAGAAGAAGAAGAAGAAGAA	GTTCTTAGGAGTTCTGGGGTTTGGGGCTGGTCTGATCGACGAAAATAAAC	VKRKNILKFVSLLGIGSFVMLAAASCTSATTPTPNPEPKPTPNPEPNPNPEPKPDPMPNPPSGGTNGGNTNPGNGGGTDNAAHQLAAAKKELSDLLATQNSNLSTYADYAKIQNTLTSAYTTAKSTSDNTSATLEQVKSATSTLQTAIDSAASEKKTFDAANPELIKFYNNLKTELQSKTTNLESLNDPQYSGIKDNLNSLYNSASEIVNKTLIPTTGNGLMRTDVEKVNTELMGAVNKLSERKTKADNYFNSFDKNVLSQSKLTSASTSQNNNQQPGNYSFVGFSTDVNGFLNTSDNNTPKWNFAQRRVWASENTPLATTPAEDETQQATPLTDVSWIYSLAGTEAKYTLTFDYFGPSTAYLYFPYKLVNTNDKAGLQYKLNNNTEPKLIEFMPAPNG…
NC96	571466	573551	-	13	6	ATATATTATTTCTGAATCAACTGTAAAAGCGAACGGAACCCTTTGTTTTC	GAAGAAGAAGAAGAAGAA	GTTCTTAGGAGTTCTGGGGTTTTCGTTTGGTCTGATCAGCGAAAATAAAC	VKRKNILKFVSLLGIGSFVMLAAASCTSATTPTPDTEPKPTPNPEPKPNPGGGDMNNPPSGGMNGRDTNPGNDGGTDNAAHQLAAAKKELSDLLATQNSNLSTYADYAKIQNTLTSAYTTAKSTSDNTSATLEQVKSATSTLQTAIDAAASEKKTFDAANPELIKFYNNLKTELQSKTTNLESLNDPQYSGIKDNLNSLYNSASKIVNKTLIPATGNGLMRTDVEKVNTELMGAVNKLSERKTNADNYFKSFDKNVLSQSKLTSASTSQNNNQQPGNYSFVGFSTDVNGFLNTSDNNTPKWNFAQRRVWESENTALTTSTTTGQNQQATPLTDVSWIYSLAETEAKYTLTFDYFGPSTAYLYFPYKLVNTNDKAGLQYKLNNNTEPKLIEFIPAPNGTS…
NY01	268402	270493	+	13	16	GTAAATTATTTCTGAATTAACTATAAAAACTCACAAAATCTTTTGTTTTC	GAAGAAGAAGAAGAAGAAGAAGAAGAAGAAGAAGAAGAAGAAGAAGAA	GTTCTTAGGAGTTCTGGGGTTTGGGGCTGGTCTGATCGACGAAAATAAAC	VKRKNILKFVSLLGIGSFVMLAAASCTSATTPTPNPEPKPTPNPEPNPNPEPKPDPMPNPPSGGTNGGNTNPGNGGGTDNAAHQLAAAKKELSDLLATQNSNLSTYADYAKIQNTLTSAYTTAKSTSDNTSATLEQVKSATSTLQTAIDSAASEKKTFDAANPELIKFYNNLKTELQSKTTNLESLNDPQYSGIKDNLNSLYNSASEIVNKTLIPTTGNGLMRTDVEKVNTELMGAVNKLSERKTKADNYFNSFDKNVLSQSKLTSASTSQNNNQQPGNYSFVGFSTDVNGFLNTSDNNTPKWNFAQRRVWASENTPLATTPAEDETQQATPLTDVSWIYSLAGTEAKYTLTFDYFGPSTAYLYFPYKLVNTNDKAGLQYKLNNNTEPKLIEFMPAPNG…
NY01	273592	275683	+	13	6	ATTGAGTTGTTGTATTTAATATATAAAATAGCTAAAATCCTTTAAAAATC	GAAGAAGAAGAAGAAGAA	GTTCTTAGAAGTTAGGGGAGTTTGGTCTGGCTTGATCTGCGAAAATAAAC	VKRKNILKFVSLLGIGSFVMLAAASCTSATTPTPNPEPKPTPNPEPNPNPEPKPDPMPNPPSGGTNGGNTNPGNGGGTDNAAHQLAAAKKELSDLLATQNSNLSTYADYAKIQNTLTSAYTTAKSTSDNTSATLEQVKSATSTLQTAIDSAASEKKTFDAANPELIKFYNNLKTELQSKTTNLESLNDPQYSGIKDNLNSLYNSASEIVNKTLIPTTGNGLMRTDVEKVNTELMGAVNKLSERKTKADNYFNSFDKNVLSQSKLTSASTSQNNNQQPGNYSFVGFSTDVNGFLNTSDNNTPKWNFAQRRVWASENTPLATTPAEDETQQATPLTDVSWIYSLAGTEAKYTLTFDYFGPSTAYLYFPYKLVNTNDKAGLQYKLNNNTEPKLIEFMPAPNG…
S6	581827	583894	-	13	10	ATTGAGTTGTTGTATTTAATATATAAAATAACTAAAATCCTTTAAAAATA	GAAGAAGAAGAAGAAGAAGAAGAAGAAGAA	GTTCTTAGAAGTTCTGGAGTCTTGGTTTGGCTTGATGAGCGAAAATAAAC	VKRKNILKFVSLLGIGSFVMLAAASCTTPVNPTPNPTPNPEPKPNPMPNPPSGGMNGGDTNPGNGGGMDNSAQQLAVARTALTSLLASKNANVEMYSDYAKIKNDLTAAYTTAKSTSDNTSATLEQVKSATSTLQTAIDAAASEKKTFDAANPELIKFYNNLKTELQSKTTNLESLNDPQYSGIKDNLNSLYNSASEIVNKTLIPTTGNGLMRTDVEKVNTELMGAVNKLSERKTNADNYFNSFDKNVLSQSKLTSASTSQNNNQQPGNYSFVGFSTDVNGFLNTSDNNTPKWNFAQRRVWESENTALATTPAEDETQQATPLTDVSWIYSLAGTEAKYTLTFDYFGPSTGYLYFPYKLANTNDKAGLQYKLNNNTEPKLIEFMPASAPSGTSAATTSP…
VA94	279156	281247	+	13	10	GTAAATTATTTCTGAATTAACTATAAAAACTCACAAAATCTTTTGTTTTC	GAAGAAGAAGAAGAAGAAGAAGAAGAAGAA	GTTCTTAGGAGTTCTGGGGTTTGGGGCTGGTCTGATCGACGAAAATAAAC	VKRKNILKFVSLLGIGSFVMLAAASCTSATTPTPNPEPKPTPNPEPNPNPEPKPDPMPNPPSGGTNGGNTNPGNGGGTDNAAHQLAAAKKELSDLLATQNSNLSTYADYAKIQNTLTSAYTTAKSTSDNTSATLEQVKSATSTLQTAIDSAASEKKTFDAANPELIKFYNNLKTELQSKTTNLESLNDPQYSGIKDNLNSLYNSASEIVNKTLIPTTGNGLMRTDVEKVNTELMGAVNKLSERKTKADNYFNSFDKNVLSQSKLTSASTSQNNNQQPGNYSFVGFSTDVNGFLNTSDNNTPKWNFAQRRVWASENTPLATTPAEDETQQATPLTDVSWIYSLAGTEAKYTLTFDYFGPSTAYLYFPYKLVNTNDKAGLQYKLNNNTEPKLIEFMPAPNG…
VA94	553045	555130	-	13	11	ATATATTATTTCTGAATCAACTGTAAAAGCGAACGGAACCCTTTGTTTTC	GAAGAAGAAGAAGAAGAAGAAGAAGAAGAAGAA	GTTCTTAGGAGTTCTGGGGTTTTCGTTTGGTCTGATCAGCGAAAATAAAC	VKRKNILKFVSLLGIGSFVMLAAASCTSATTPTPDTEPKPTPNPEPKPNPGGGDMNNPPSGGMNGRDTNPGNDGGTDNAAHQLAAAKKELSDLLATQNSNLSTYADYAKIQNTLTSAYTTAKSTSDNTSATLEQVKSATSTLQTAIDAAASEKKTFDAANPELIKFYNNLKTELQSKTTNLESLNDPQYSGIKDNLNSLYNSASKIVNKTLIPATGNGLMRTDVEKVNTELMGAVNKLSERKTNADNYFKSFDKNVLSQSKLTSASTSQNNNQQPGNYSFVGFSTDVNGFLNTSDNNTPKWNFAQRRVWESENTALTTSTTTGQNQQATPLTDVSWIYSLAETEAKYTLTFDYFGPSTAYLYFPYKLVNTNDKAGLQYKLNNNTEPKLIEFIPAPNGTS…
W101	533995	536080	-	13	9	ATATATTATTTCTGAATCAACTGTAAAAGCGAACGGAACCCTTTGTTTTC	GAAGAAGAAGAAGAAGAAGAAGAAGAA	GTTCTTAGGAGTTCTGGGGTTTTCGTTTGGTCTGATCAGCGAAAATAAAC	VKRKNILKFVSLLGIGSFVMLAAASCTSATTPTPDTEPKPTPNPEPKPNPGGGDMNNPPSGGMNGRDTNPGNDGGTDNAAHQLAAAKKELSDLLATQNSNLSTYADYAKIQNTLTSAYTTAKSTSDNTSATLEQVKSATSTLQTAIDAAASEKKTFDAANPELIKFYNNLKTELQSKTTNLESLNDPQYSGIKDNLNSLYNSASKIVNKTLIPATGNGLMRTDVEKVNTELMGAVNKLSERKTNADNYFKSFDKNVLSQSKLTSASTSQNNNQQPGNYSFVGFSTDVNGFLNTSDNNTPKWNFAQRRVWESENTALTTSTTTGQNQQATPLTDVSWIYSLAETEAKYTLTFDYFGPSTAYLYFPYKLVNTNDKAGLQYKLNNNTEPKLIEFIPAPNGTS…
CA06	575954	578048	-	14	10	ATTGAGTTGTTGTATTTAATATATAAAATAGCTAAAATCCTTTAAAAATC	GAAGAAGAAGAAGAAGAAGAAGAAGAAGAA	GTTCTTAGAAGTTTAGGAGTTAGCGACTGCTCTGATCGGCGAAAATAAAT	VKRKNILKFVSLLGIGSFVMLAAASCTSATTPTPNPEPKPTPNPEPNPMPNPGGGDMNNPPSGGMNGGDTNPGNDGGMDNATQQLAAAKKELSDLLATQNSNLASYADYAKIQNTLTSAYTTAKSTSDNTSATLEQVKSATSTLQTTIDAAASEKKTFDAANPELIKFYNNLKTELQSKTTNLESLNDPQYSGIKDNLNSLYNSASEIVNKTLIPATGNDLMRTDVEKVNTELMGAVSSLAARKTSAENLFSAFDKNVLVKTNLTAGNGSQVANDQPGNYSFVAFSVNAVTASDNLPNWNFAQRRVWDSATAPLATTTTENGAQPEPALTDVSWIYNLTGTGAKYSFTFNYFGPRTGYLYFPYKLVNSSQSDKVGLQYKLNEGSVQAITFAPTTPASAV…
CA06	807474	809568	-	14	9	ATTGAGTTGTTGTATTTAATATATAAAATAGCTAAAATCCTTTAAAAATC	GAAGAAGAAGAAGAAGAAGAAGAAGAA	GTTCTTAGAAGTTTAGGAGTTAGCGACTGCTCTGATCGGCGAAAATAAAT	VKRKNILKFVSLLGIGSFVMLAAASCTSATTPTPNPEPKPTPNPEPNPMPNPGGGDMNNPPSGGMNGGDTNPGNDGGMDNATQQLAAAKKELSDLLATQNSNLASYADYAKIQNTLTSAYTTAKSTSDNTSATLEQVKSATSTLQTAIDSAASEKKTFDAANPELIKFYNNLKTELQSKTTNLESLNDPQYSGIKDNLNSLYNSASEIVNKTLIPATGNDLMRTDVEKVNTELMGAVSLLAARKTSAENLFSAFDKNVLVKTNLTAGNGSQVANDQPGNYSFVAFSVNAVTASDNLPNWNFAQRRVWDSATAPLATTTTENGAQPEPALTDVSWIYNLTGTGAKYSFTFNYFGPRTGYLYFPYKLVNSSQSDKVGLQYKLNEGSVQAITFAPTTPASAV…
MC06	782963	785057	-	14	9	ATTGAGTTGTTGTATTTAATATATAAAATAGCTAAAATCCTTTAAAAATC	GAAGAAGAAGAAGAAGAAGAAGAAGAA	GTTCTTAGAAGTTTAGGAGTTAGCGACTGCTCTGATCGGCGAAAATAAAT	VKRKNILKFVSLLGIGSFVMLAAASCTSATTPTPNPEPKPTPNPEPNPMPNPGGGDMNNPPSGGMNGGDTNPGNDGGMDNATQQLAAAKKELSDLLATQNSNLASYADYAKIQNTLTSAYTTAKSTSDNTSATLEQVKSATSTLQTTIDAAASEKKTFDAANPELIKFYNNLKTELQSKTTNLESLNDPQYSGIKDNLNSLYNSASEIVNKTLIPATGNDLMRTDVEKVNTELMGAVSSLAARKTSAENLFSAFDKNVLVKTNLTAGNGSQVANDQPGNYSFVAFSVNAVTASDNLPNWNFAQRRVWDSATAPLATTTTENGAQPEPALTDVSWIYNLTGTGAKYSFTFNYFGPRTGYLYFPYKLVNSSQSDKVGLQYKLNEGSVQAITFAPTTPASAV…
NC08	547033	549127	-	14	6	ATTGAGTTGTTGTATTTAATATATAAAATAGCTAAAATCCTTTAAAAATC	GAAGAAGAAGAAGAAGAA	GTTCTTAGAAGTTTAGGAGTTAGCGACTGCTCTGATCGGCGAAAATAAAT	VKRKNILKFVSLLGIGSFVMLAAASCTSATTPTPNPELKPTPNPEPNPMPNPGGGDMNNPPSGGMNGGDTNPGNDGGMDNATQQLAAAKKELSDLLATQNSNLASYADYAKIQNTLTSAYTTAKSTSDNTSATLEQVKSATSTLQTTIDAAASEKKTFDAANPELIKFYNNLKTELQSKTTNLESLNDPQYSGIKDNLNSLYNSASEIVNKTLIPATGNDLMRTDVEKVNTELMGAVSSLAARKTSAENLFSAFDKNVLVKTNLTAGNGSQVANDQPGNYSFVAFSVNAVTASDNLPNWNFAQRRVWDSATAPLATTTTENGAQPEPALTDVSWIYNLTGTGAKYSFTFNYFGPRTGYLYFPYKLVNSSQSDKVGLQYKLNEGSVQAITFAPTTPASAV…
NC95	552480	554574	-	14	9	ATTGAGTTGTTGTATTTAATATATAAAATAGCTAAAATCCTTTAAAAATC	GAAGAAGAAGAAGAAGAAGAAGAAGAA	GTTCTTAGAAGTTTAGGAGTTAGCGACTGCTCTGATCGGCGAAAATAAAT	VKRKNILKFVSLLGIGSFVMLAAASCTSATTPTPNPEPKPTPNPEPNPMPNPGGGDMNNPPSGGMNGGDTNPGNDGGMDNATQQLAAAKKELSDLLATQNSNLASYADYAKIQNTLTSAYTTAKSTSDNTSATLEQVKSATSTLQTTIDAAASEKKTFDAANPELIKFYNNLKTELQSKTTNLESLNDPQYSGIKDNLNSLYNSASEIVNKTLIPATGNDLMRTDVEKVNTELMGAVSSLAARKTSAENLFSAFDKNVLVKTNLTAGNGSQVANDQPGNYSFVAFSVNAVTASDNLPNWNFAQRRVWDSATAPLATTTTENGAQPEPALTDVSWIYNLTGTGAKYSFTFNYFGPRTGYLYFPYKLVNSSQSDKVGLQYKLNEGSVQAITFAPTTPASAV…
NC96	816783	818877	-	14	11	ATTGAGTTGTTGTATTTAATATATAAAATAGCTAAAATCCTTTAAAAATC	GAAGAAGAAGAAGAAGAAGAAGAAGAAGAAGAA	GTTCTTAGAAGTTTAGGAGTTAGCGACTGCTCTGATCGGCGAAAATAAAT	VKRKNILKFVSLLGIGSFVMLAAASCTSATTPTPNPEPKPTPNPEPNPMPNPGGGDMNNPPSGGMNGGDTNPGNDGGMDNATQQLAAAKKELSDLLATQNSNLASYADYAKIQNTLTSAYTTAKSTSDNTSATLEQVKSATSTLQTTIDAAASEKKTFDAANPELIKFYNNLKTELQSKTTNLESLNDPQYSGIKDNLNSLYNSASEIVNKTLIPATGNDLMRTDVEKVNTELMGAVSSLAARKTSAENLFSAFDKNVLVKTNLTAGNGSQVANDQPGNYSFVAFSVNAVTASDNLPNWNFAQRRVWDSATAPLATTTTENGAQPEPALTDVSWIYNLTGTGAKYSFTFNYFGPRTGYLYFPYKLVNSSQSDKVGLQYKLNEGSVQAITFAPTTPASAV…
Rhigh	594931	596980	-	14	7	ATAAGTTGTGATGGTTTTAACTATAAAAACTCACAAAACCTTTTGTTTTC	GAAGAAGAAGAAGAAGAAGAA	GTTCTTAGAAGTTTAGGGGTATGGGGTTGGGCAAGTGAGCGAAAATAAAC	VKRKNILKFVSLLGIGSFVMLAAASCTTSVNPTPNPTPELKPDPMPNPPSGGMNGGDTNPGNGGGMDNSAQQLAAARTALTSLLASKNANVEMYSDYAKIKNDLTAAYTTAKSTSDNTSATLEQVKSATSTLQTAIDAAASEKKTFDASNPELIKFYNNLKTELQSKTTNLESLNDPQYSGIKDNLNSLYNSASEIVNKTLIPATGNDLMRTDVEKVNTELMGAVSSLAARKTSAENLFSAFDKNVLVKTNLTAGNDSQVANDQPGNYSFVAFSVNAVTASDNLPNWNFAQRRVWDSATAPLATTTTENGAQPEPALTDVSWIYNLTGTGAKYSFTFNYFGPRTGYLYFPYKLVNSSQSDKVGLQYKLNEGSVQAITFAPTTPASAVSEPTHTPTEMAS…
Rlow	595068	597117	-	14	11	ATAAGTTGTGATGGTTTTAACTATAAAAACTCACAAAACCTTTTGTTTTC	GAAGAAGAAGAAGAAGAAGAAGAAGAAGAAGAA	GTTCTTAGAAGTTTAGGGGTATGGGGTTGGGCAAGTGAGCGAAAATAAAC	VKRKNILKFVSLLGIGSFVMLAAASCTTSVNPTPNPTPELKPDPMPNPPSGGMNGGDTNPGNGGGMDNSAQQLAAARTALTSLLASKNANVEMYSDYAKIKNDLTAAYTTAKSTSDNTSATLEQVKSATSTLQTAIDAAASEKKTFDASNPELIKFYNNLKTELQSKTTNLESLNDPQYSGIKDNLNSLYNSASEIVNKTLIPATGNDLMRTDVEKVNTELMGAVSSLAARKTSAENLFSAFDKNVLVKTNLTAGNDSQVANDQPGNYSFVAFSVNAVTASDNLPNWNFAQRRVWDSATAPLATTTTENGAQPEPALTDVSWIYNLTGTGAKYSFTFNYFGPRTGYLYFPYKLVNSSQSDKVGLQYKLNEGSVQAITFAPTTPASAVSEPTHTPTEMAS…
VA94	563283	565377	-	14	13	ATTGAGTTGTTGTATTTAATATATAAAATAGCTAAAATCCTTTAAAAATC	GAAGAAGAAGAAGAAGAAGAAGAAGAAGAAGAAGAAGAA	GTTCTTAGAAGTTTAGGAGTTAGCGACTGCTCTGATCGGCGAAAATAAAT	VKRKNILKFVSLLGIGSFVMLAAASCTSATTPTPNPEPKPTPNPEPNPMPNPGGGDMNNPPSGGMNGGDTNPGNDGGMDNATQQLAAAKKELSDLLATQNSNLASYADYAKIQNTLTSAYTTAKSTSDNTSATLEQVKSATSTLQTTIDAAASEKKTFDAANPELIKFYNNLKTELQSKTTNLESLNDPQYSGIKDNLNSLYNSASEIVNKTLIPATGNDLMRTDVEKVNTELMGAVSSLAARKTSAENLFSAFDKNVLVKTNLTAGNGSQVANDQPGNYSFVAFSVNAVTASDNLPNWNFAQRRVWDSATAPLATTTTENGAQPEPALTDVSWIYNLTGTGAKYSFTFNYFGPRTGYLYFPYKLVNSSQSDKVGLQYKLNEGSVQAITFAPTTPASAV…
W101	762771	764808	-	14	8	ATTGAGTTGTTGTATTTAATATATAAAATAGCTAAAATCCTTTAAAAATC	GAAGAAGAAGAAGAAGAAGAAGAA	GTTCTTAGAAGTTTAGGAGTTAGCGACTGCTCTGATCGGCGAAAATAAAT	VKRKNILKFVSLLGIGSFVMLAAASCTSATTPTPNPEPKPTPNPEPNPMPNPGGGMNGGDTNPGNDGGMDNATQQLAAAKKELSDLLATQNSNLASYADYAKIQNTLTSAYTTAKSTSDNTSATLEQVKSATSTLQTTIDAAASEKKTFDAANPELIKFYNNLKTELQSKTTNLESLNDPQYSGIKDNLNSLYNSASEIVNKTLIPATGNDLMRTDVEKVNTELMGAVSSLAARKTSAENLFSAFDKNVLVKTNLTAGNGSQVANDQPGNYSFVAFSVNAVTASDNLPNWNFAQRRVWDSATAPLATTTTENGAQPEPALTDVSWIYNLTGTGAKYSFTFNYFGPRTGYLYFPYKLVNSSQSDKVGLQYKLNEGSVQAITFAPTTPASAVSEPTHTPTE…
W101	769847	771884	-	14	12	ATTGAGTTGTTGTATTTAATATATAAAATAGCTAAAATCCTTTAAAAATC	GAAGAAGAAGAAGAAGAAGAAGAAGAAGAAGAAGAA	GTTCTTAGAAGTTTAGGAGTTAGCGACTGCTCTGATCGGCGAAAATAAAT	VKRKNILKFVSLLGIGSFVMLAAASCTSATTPTPNPEPKPTPNPEPNPMPNPGGGMNGGDTNPGNDGGMDNATQQLAAAKKELSDLLATQNSNLASYADYAKIQNTLTSAYTTAKSTSDNTSATLEQVKSATSTLQTTIDAAASEKKTFDAANPELIKFYNNLKTELQSKTTNLESLNDPQYSGIKDNLNSLYNSASEIVNKTLIPATGNDLMRTDVEKVNTELMGAVSSLAARKTSAENLFSAFDKNVLVKTNLTAGNGSQVANDQPGNYSFVAFSVNAVTASDNLPNWNFAQRRVWDSATAPLATTTTENGAQPEPALTDVSWIYNLTGTGAKYSFTFNYFGPRTGYLYFPYKLVNSSQSDKVGLQYKLNEGSVQAITFAPTTPASAVSEPTHTPTE…
CA06	268203	270270	+	15	6	ATTGAGTTGTTGTATTTAATATATAAAATAGCTAAAATCCTTTAAAAATC	GAAGAAGAAGAAGAAGAA	GTTCTTAGAAGTTAGGGGAGTTTGGTCTGGCTTGATCTGCGAAAATAAAC	VKRKNILKFVSLLGIGSFVMLAAASCTTPVNPTPNPTPNPTPNPTPNPQPKPDPMPNPGGGMMGGNTNPGNGGGTDNAAQQLAEAKAALTTLLNTKSEKVGLYSDYANIQDTLVKAYTAAKEISDKSDATLQEVNNAKTTLETAITTAASSKTSFDEKNPELIKAYNALKETLKNEKSNLDLVMDAEFAAIKNNFDSLYQTAKTLIEGTLQPKMGNIPQVEAVNQANQAIVNATQMLETRKNNASTLNTSFLKETLKSASLSAATGDGAATVQQQPGDYSFVAYASDITSPNWNFAQRTVWTADNKLVTSPLPNNSQNSAPLTDVSWIYTLSGTGAKYTLTFDYYGPQTGYLYFPYKLVKDADKNNIGLQYKLNDGNFEQINFAPAPTEPARSTMPQTA…
CA06	446599	448672	+	15	10	AAAACATTTCTCTGAATTTGTTATAAAAATTAGTGAAACCCTTGATTTTC	GAAGAAGAAGAAGAAGAAGAAGAAGAAGAA	GTTCTTAGAAGTTCTGTGGTCTGGGGTTGGTTTGATCAGCGAAAATAAAC	VKRKNILKFVSLLGIGSFVMLAAASCTTPVSPTPNPTPNPTPNPTPNPQPKPDPMPNPGGGMMGGNTNPGNGGGTDNAAQQLAEAKAALTTLLNTKSEKVGLYSDYANIQDTLVKAYTAAKEISDKSDATLQEVNNAKTTLETAITTAASSKTSFDEKNPELIKAYNALKETLKNEKSNLDLVMDAEFAAIKNNLDSLYQTAKTFVEGTLQPKMGNIPQVEAVNQANQAIVNATQMLETRKNNASTLNTSFLKETLKSASLSAATGDGAATVQQQPGDYSFVAYASDITSPNWNFAQRTVWTADNKLVTSPLPNNSQNSAPLTDVSWIYTLSGTGAKYTLTFDYYGPQTGYLYFPYKLVKDADKNNIGLQYKLNDGNFEQINFAPAQPVEAGPAEPARS…
NC08	268663	270718	+	15	12	ATTGAGTTGTTGTATTTAATATATAAAATAGCTAAAATCCTTTAAAAATC	GAAGAAGAAGAAGAAGAAGAAGAAGAAGAAGAAGAA	GTTCTTAGAAGTTAGGGGAGTTTGGTCTGGCTTGATCTGCGAAAATAAAC	VKRKNILKFVSLLGIGSFVMLAAASCTTPVNPTPNPTPNPTPNPQPKPDPMPNPGGGMMGGNTNPGNGGGTDNAAQQLAEAKAALTTLLNTKSEKVGLYSDYANIQDTLVKAYTAAKEISDKSDATLQEVNNAKTTLETAITTAASSKTSFDEKNPELIKAYNALKETLKNEKSNLDLVMDAEFAAIKNNFDSLYQTAKTLIEGTLQPKMGNIPQVEAVNQANQAIVNATQMLETRKNNASTLNTSFLKETLKSASLSAATGDGAATVQQQPGDYSFVAYASDIASPNWNFAQRTVWTADNNLVTSPLPNNSQNSAPLTDVSWIYTLSGTGAKYTLTFDYYGPQTGYLYFPYKLIKDDDKNNIGLQYKLNDGNFEQINFAPAPTEPARSTMPQTAPENQ…
NC95	273625	275710	+	15	6	ATTGAGTTGTTGTATTTAATATATAAAATAGCTAAAATCCTTTAAAAATC	GAAGAAGAAGAAGAAGAA	GTTCTTAGAAGTTAGGGGAGTTTGGTCTGGCTTGATCTGCGAAAATAAAC	VKRKNILKFVSLLGIGSFVMLAAASCTTPVNPTPNPTPNPTPNPTPNPQPKPDPMPNPGGGMMGGNTNPGNGGGTDNAAQQLAEAKAALTTLLNTKSEKVGLYSDYANIQDTLVKAYTAAKEISDKSDATLQEVNNAKTTLETAITTAASSKTSFDEKNPELIKAYNALKETLKNEKSNLDLVMDAEFAAIKNNFDSLYQTAKTLIEGTLQPKMGNIPQVEAVNQANQAIVNATQMLETRKNNASTLNTSFLKETLKSASLSAATGDGAATVQQQPGDYSFVAYASDITSPNWNFAQRTVWTADNKLVTSPLPNNSQNSAPLTDVSWIYTLSGTGAKYTLTFDYYGPQTGYLYFPYKLIKDDDKNNIGLQYKLNDGNFEQINFAPTQPVESASTEPARS…
NC96	452067	454140	+	15	11	AAAACATTTCTCTGAATTTGTTATAAAAATTAGTGAAACCCTTGATTTTC	GAAGAAGAAGAAGAAGAAGAAGAAGAAGAAGAA	GTTCTTAGAAGTTCTGTGGTCTGGGGTTGGTTTGATCAGCGAAAATAAAC	VKRKNILKFVSLLGIGSFVMLAAASCTTPVSPTPNPTPNPTPNPTPNPQPKPDPMPNPGGGMMGGNTNPGNGGGTDNAAQQLAEAKAALTTLLNTKSEKVGLYSDYANIQDTLVKAYTAAKEISDKSDATLQEVNNAKTTLETAITTAASSKTSFDEKNPELIKAYNALKETLKNEKSNLDLVMDAEFAAIKNNLDSLYQTAKTFVEGTLQPKMGNIPQVEAVNQANQAIVNATQMLETRKNNASTLNTSFLKETLKSASLSAATGDGAATVQQQPGDYSFVAYASDITSPNWNFAQRTVWTADNKLVTSPLPNNSQNSAPLTDVSWIYTLSGTGAKYTLTFDYYGPQTGYLYFPYKLVKDADKNNIGLQYKLNDGNFEQINFAPAQPVEAGPAEPARS…
NY01	278800	280873	+	15	8	ATTGAGTTGTTGTATTTAATATATAAAATAGCTAAAATCCTTTAAAAATC	GAAGAAGAAGAAGAAGAAGAAGAA	GTTCTTAGAAGTTAGGGGAGTTTGGTCTGGCTTGATCTGCGAAAATAAAC	VKRKNILKFVSLLGIGSFVMLAAASCTTPVNPTPNPTPNPTPNPQPKPDPMPNPGGGMMGGNTNPGNGGGTDNAAQQLAEAKAALTTLLNTKSEKVGLYSDYANIQDTLVKAYTAAKEISDKSDATLQEVNNAKTTLETAITTAASSKTSFDEKNPELIKAYNALKETLKNEKSNLDLVMDAEFAAIKNNFDSLYQTAKTLIEGTLQPKMGNIPQVEAVNQANQAIVNATQMLETRKNNASTLNTSFLKETLKSASLSAATGDGAATVQQQPGDYSFVAYASDITSPNWNFAQRTVWTADNKLVTSPLPNNSQNSAPLTDVSWIYTLSGTGAKYTLTFDYYGPQTGYLYFPYKLIKDDDKNNIGLQYKLNDGNFEQINFAPTQPVESASTEPARSTMPQ…
Rhigh	289417	291490	+	15	8	GAGTTGTTGTATTTAATATATAAAATAGCTAAAATCCTTTAAAAATCCAA	GAAGAAGAAGAAGAAGAAGAAGAA	GTTCTTAGAAGTTAGGGGAGTTTGGTCTGGCTTGATCTGCGAAAATAAAC	VKRKNILKFVSLLGIGSFVMLAAASCTTPVNPTPNPTPNPTPNPQPKPDPMPNPGGGMMGGNTNPGNGGGTDNAAQQLAEAKAALTTLLNTKSEKVGLYSDYANIQDTLVKAYTAAKEISDKSDATLQEVNNAKTTLETAITTAASSKTSFDEKNPELIKAYNALKETLKNEKSNLDLVMAAEFAAIKNNLDSLYQTAKTLIEGTLQPKMGNNPQVEAINQANQAIVNATQMLETRKNNASTLNTSFLKETLKSASLSAATGDGAATVQQQPGDYSFVAYASDITSLNWNFAQRTVWTADNKLVTSPLPNNSQNSAPLTDVSWIYTLSGTGAKYTLTFDYYGPQTGYLYFPYKLVKDDDKNNIGLQYKLNDGNFEQINFAPTQPVESASTEPARSTMPQ…
Rlow	289503	291576	+	15	8	GAGTTGTTGTATTTAATATATAAAATAGCTAAAATCCTTTAAAAATCCAA	GAAGAAGAAGAAGAAGAAGAAGAA	GTTCTTAGAAGTTAGGGGAGTTTGGTCTGGCTTGATCTGCGAAAATAAAC	VKRKNILKFVSLLGIGSFVMLAAASCTTPVNPTPNPTPNPTPNPQPKPDPMPNPGGGMMGGNTNPGNGGGTDNAAQQLAEAKAALTTLLNTKSEKVGLYSDYANIQDTLVKAYTAAKEISDKSDATLQEVNNAKTTLETAITTAASSKTSFDEKNPELIKAYNALKETLKNEKSNLDLVMAAEFAAIKNNLDSLYQTAKTLIEGTLQPKMGNNPQVEAINQANQAIVNATQMLETRKNNASTLNTSFLKETLKSASLSAATGDGAATVQQQPGDYSFVAYASDITSLNWNFAQRTVWTADNKLVTSPLPNNSQNSAPLTDVSWIYTLSGTGAKYTLTFDYYGPQTGYLYFPYKLVKDDDKNNIGLQYKLNDGNFEQINFAPTQPVESASTEPARSTMPQ…
S6	584223	586272	-	15	15	ATAAATTATTTCTGAATCAACTGTAAAAACGAATAAAAGATTTTGTTTTC	GAAGAAGAAGAAGAAGAAGAAGAAGAAGAAGAAGAAGAAGAAGAA	GTTCTTAGGAGTTCTGGGGTTTGGGAATCCTGTGATCAGCGAAAATTAAG	VKRKNILKFVSLLGIGSFVMLAAASCTQASTPTPTPTPTPTTTTTTTPNPEPKPDPMPNPPSGGMNGGNTNPGGGQNMMDAAAQELTAAKKVLSDLIGEESKTVELYADYAKIKADLTSAYAVAKTTSDSSTSTLDQVKTATSTLQTAIDAAVKARTDFDAVNGPLVTAYNALKETLKNEKSNLDLVMAAEFAAIKNNLDSLYQTAKTLIEGTLQPKMGNSPQVEAVTQANQAIVNATQMLETRKNNASTLNTSFLKETLKSASLSAATGDNATTVQQQPGNYSFVAYTSDIASPNWNFAQRTVWTADNKLVTSPLPNNSQNSAPLTDVSWIYTLSGTGAKYTLTFDYYGPQTGYLYFPYKLVKGADKNNIGLQYKLNDGNFEQINFAPAPTEPARSTM…
S6	813835	815878	-	15	16	TAATCTAGTTATGGTTTAAGATATAAAAACTTACAAAAGCTTTTATTTTC	GAAGAAGAAGAAGAAGAAGAAGAAGAAGAAGAAGAAGAAGAAGAAGAA	GTTCTTAGGAGTTCTGGGGTTTTCGTTTGGTCTGATCGGCGAAAATTAAG	VKRKNILKFVSLLAIGSFVMLAAASCTSTTTPTPNPEPKPNPTPNPEPKPNSPSGGMNGGDNNPGNGGGMDNSAQQLAAARTALTTLINSRTQNTELYVDYAKIQDTLVKAYDAAKAVLDNTASTTQNINQAKTTLETAINAAAKAKTDFNAANGALVTAYNALKETLKNEKSNLDLVMVAEFAAIKNNLDSLYQTAKTLVEGTLQPKMENSPQVEAVNQANQAIVDATQMLETRKNNASALNTSFLKETLKSASLSAATGDGAATVQQQPGDYSFVSYASDITSPNWNFAQRTVWTADNNLVTSPLPNNSQNSAPLTDVSWIYTLSGTGAKYTLTFDYYGPQTGYLYFPYKLVKDADKNNIGLQYKLNDGNFEQINFAQTQPVESESAATEPARSTMP…
VA94	284363	286460	+	15	6	ATTGAGTTGTTGTATTTAATATATAAAATAGCTAAAATCCTTTAAAAATC	GAAGAAGAAGAAGAAGAA	GTTCTTAGAAGTTAGGGGAGTTTGGTCTGGCTTGATCTGCGAAAATAAAC	VKRKNILKFVSLLGIGSFVMLAAASCTTPVNPTPNPTPNPTPNPTPNPTPNPQPKPDPMPNPGGGMMGGNTNPGNGGGTDNAAQQLAEAKAALTTLLNTKSEKVGLYSDYANIQDTLVKAYTAAKEISDKSDATLQEVNNAKTTLETAITTAASSKTSFDEKNPELIKAYNALKETLKNEKSNLDLVMDAEFAAIKNNFDSLYQTAKTLIEGTLQPKMGNIPQVEAVNQANQAIVNATQMLETRKNNASTLNTSFLKETLKSASLSAATGDGAATVQQQPGDYSFVAYASDITSPNWNFAQRTVWTADNKLVTSPLPNNSQNSAPLTDVSWIYTLSGTGAKYTLTFDYYGPQTGYLYFPYKLIKDDDKNNIGLQYKLNDGNFEQINFAPTQPVESASTE…
NC96	273615	275724	+	16	6	ATTGAGTTGTTGTATTTAATATATAAAATAGCTAAAATCCTTTAAAAATC	GAAGAAGAAGAAGAAGAA	GTTCTTAGAAGTTAGGGGAGTTTGGTCTGGCTTGATCTGCGAAAATAAAC	VKRKNILKFVSLLGIGSFVMLAAASCTTPVNPTPNPTPNPTPNPTPNPTPNPTPNPQPKPDPMPNPGGGMMGGNTNPGNGGGTDNAAQQLAEAKAALTTLLNTKSEKVGLYSDYANIQDTLVKAYTAAKEISDKSDATLQEVNNAKTTLETAITTAASSKTSFDEKNPELIKAYNALKETLKNEKSNLDLVMDAEFAAIKNNFDSLYQTAKTLIEGTLQPKMGNIPQVEAVNQANQAIVNATQMLETRKNNASTLNTSFLKETLKSASLSAATGDGAATVQQQPGDYSFVAYASDITSPNWNFAQRTVWTADNKLVTSPLPNNSQNSAPLTDVSWIYTLSGTGAKYTLTFDYYGPQTGYLYFPYKLIKDDDKNNIGLQYKLNDGNFEQINFAPTQPVES…
Rhigh	490409	492455	+	16	20	ATAAATTATTTCTGAATCAACTGTAAAAACGAATAAAAGATTTTGTTTTC	GAAGAAGAAGAAGAAGAAGAAGAAGAAGAAGAAGAAGAAGAAGAAGAAGAAGAAGAAGAA	GTTCTTAGGAGTTCTGGGGTTTGGGAATCCTGTGATCAGCGAAAATTAAG	VKRKNILKFVSLLGIGSFVMLAAASCTQASTPTPTPTPNPEPKPDPMPNPPSGGMNGGNTNPGGGQNMMDAAAQELTAAKKVLSDLIGEESKTVELYADYAKIKADLTSAYAVAKTTSDSSTSTLDQVKTATSTLQTAIDAAVKARTDFDAVNGPLVAAYNALKETLKNEKSNLDLVMAAEFAAIKNNLDSLYQTAKTLVEGTLQPKMENSPQVEAVNQANQAIVDATRMLETRKNNASTLNTSFLKETLKSASLSAATGDNATTVQQQPGDYSFVAYASDITSPNWNFAQRTVWTADTKLVTSPLPNNSQNSAPLTDVSWIYSLTRTDAKYTLTFNYYGPDTAYLYFPYKLVKGADKNNIGLQYKLNDGNFEQINFAPTQPVESESESAATEPARSTM…
Rlow	490471	492517	+	16	9	ATAAATTATTTCTGAATCAACTGTAAAAACGAATAAAAGATTTTGTTTTC	GAAGAAGAAGAAGAAGAAGAAGAAGAA	GTTCTTAGGAGTTCTGGGGTTTGGGAATCCTGTGATCAGCGAAAATTAAG	VKRKNILKFVSLLGIGSFVMLAAASCTQASTPTPTPTPNPEPKPDPMPNPPSGGMNGGNTNPGGGQNMMDAAAQELTAAKKVLSDLIGEESKTVELYADYAKIKADLTSAYAVAKTTSDSSTSTLDQVKTATSTLQTAIDAAVKARTDFDAVNGPLVAAYNALKETLKNEKSNLDLVMAAEFAAIKNNLDSLYQTAKTLVEGTLQPKMENSPQVEAVNQANQAIVDATRMLETRKNNASTLNTSFLKETLKSASLSAATGDNATTVQQQPGDYSFVAYASDITSPNWNFAQRTVWTADTKLVTSPLPNNSQNSAPLTDVSWIYSLTRTDAKYTLTFNYYGPDTAYLYFPYKLVKGADKNNIGLQYKLNDGNFEQINFAPTQPVESESESAATEPARSTM…
CA06	568458	570564	-	17	7	ATTGAGTTGTTGTATTTAATATATAAAATAGCTAAAATCCTTTAAAAATC	GAAGAAGAAGAAGAAGAAGAA	GTTCTTAGAAGTTTAGGAGTTAGCGGATGCTCTGATCAGCGAAAATAAAC	VKRKNILKFVSLLGIGSFVMLAAASCTQASTPTPTPTPTPTPTPNPEPKPDPMTPPSGGDMNNPLSGGMNGGDTNPGNGGGTDNAVQQLAAARKTLTDLLGTENTNVALYADYAKIQSTLSTAYMTAKTASENTSATLDNLRSASTTLQAAIDKAASDKRAFDSANQPLVTAYNQLKTTLQSKTTSLEGLSENKYSSIKNHLSKLFDTGSAITAKTLDPTMGTVPEVLPVTKANEDITTAVSKLTEWKTNADKFNEFVKNPLSKGKLSAGADSAHNQEQPANWSFAGYSVDLTTGSTGNSQNPLNWNFAQRKVWTSEGQQTGKTALVSSPVSATDVSWIYSLAGEGTKYTLTFEYYGPDNAFLYFPYKLVKQADSSSVALQYSLNKTSSKLINFEPAET…
F	499668	501783	+	17	9	TAATCTAGTTATGGTTTAAGATATAAAAACTTACAAAACCTTTTATTTTC	GAAGAAGAAGAAGAAGAAGAAGAAGAA	GATCTTAGAAGTTCTTAAGTTTGGGTCTCGTCTGATCGGTGAAAATTAAG	VKRKNILKFVSLLGIGSFVMLAAASCTSATTPTPNPTPKPDSMPNPGGGMNGGNTNRGNGGGMMGDNPNPGNTTPEQQLAAARKTLTDLLGTENTNVAFYADYAKIQSTLNAAYMTAKTASENTSASLENLRSASTTLQAAIDKAASDKRAFDSANQSLVTAYNNLKTTLQFKTTSLEGLSENKYSGIKNHLSKLFDRGSAITAKTLDPTSGERPTLEKVNEANNSIKMAISPESLKKWKDNADKFNEFEKNPLSKEKLSTGTDSAHNQEQPANWSFAGYSVDLTTGSDSNSQNLPNWNFAQRKVWTSEGQQHGRTVLVSSPVSSTDVSWIYSLAGEGTKYTLTFEYYGPDTAFLYFPYKLVKQADSSSVALQYSLNKTSSKLINFEPAETVSTNADES…
MC06	544421	546560	-	17	12	ATTGAGTTGTTGTATTTAATATATAAAATAGCTAAAATCCTTTAAAAATC	GAAGAAGAAGAAGAAGAAGAAGAAGAAGAAGAAGAA	GTTCTTAGAAGTTTAGGAGTTAGCGGATGCTCTGATCAGCGAAAATAAAC	VKRKNILKFVSLLGIGSFVMLAAASCTQASTPTPTPTPTPTPTPNPEPKPDPMTPPSGGDMNNPLSGGMNGGDTNPGNGGGTDNAVQQLAAARKTLTDLLGTENTNVALYADYAKIQSTLSTAYMTAKTASENTSATLDNLRSASTTLQAAIDKAASDKRAFDSANQSLVAAYNNLKTTLQSKTNSLEGLSENKYSGIKNHLSKLFDAGSAITAKTLDPTMGTVPEVLPVTKANEDITTAVSKLTEWKTNADKFNEFVKNPLSKGKLSAGADSAHNQEQPANWSFAGYSVDLTTGSTGNSQNPLNWNFAQRKVWTSEGQQTGKTALVSSPVSATDVSWIYSLAGEGTKYTLTFEYYGPDNAFLYFPYKLVKQADSSSVALQYSLNKTSSKLINFEPAET…
NC08	539528	541628	-	17	16	ATTGAGTTGTTGTATTTAATATATAAAATAGCTAAAATCCTTTAAAAATC	GAAGAAGAAGAAGAAGAAGAAGAAGAAGAAGAAGAAGAAGAAGAAGAA	GTTCTTAGAAGTTTAGGAGTTAGCGGATGCTCTGATCAGCGAAAATAAAC	VKRKNILKFVSLLGIGSFVMLAAASCTQASTPTPTPTPTPTPNPEPKPDPMTPPSGGDMNNPLSGGMNGGDTNPGNGGGTDNAVQQLAAARKTLTDLLGTENTNVALYADYAKIQSTLSTAYMTAKTASENTSATLDNLRSASTTLQAAIDKAASDKRAFDSANQPLVTAYNQLKTTLQSKTTSLEGLSENKYSSIKNHLSKLFDTGSAITAKTLDPTMGTVPEVLPVTKANEDITTAVSKLTEWKTNADKFNEFVKNPLSKGKLSAGADSAHNQEQPANWSFAGYSVDLTTGSTGNSQNPLNWNFAQRKVWTSEGQQTGKTALVSSPVSATDVSWIYSLAGEGTKYTLTFEYYGPDNAFLYFPYKLVKQADSSSVALQYSLNKTSSKLINFEPAETVS…
NC95	544696	546790	-	17	11	ATTGAGTTGTTGTATTTAATATATAAAATAGCTAAAATCCTTTAAAAATC	GAAGAAGAAGAAGAAGAAGAAGAAGAAGAAGAA	GTTCTTAGAAGTTTAGGAGTTAGCGGATGCTCTGATCAGCGAAAATAAAC	VKRKNILKFVSLLGIGSFVMLAAASCTQASTPTPTPTPTPNPEPKPDPMTPPSGGDMNNPLSGGMNGGDTNPGNGGGTDNAVQQLAAARKTLTDLLGTENTNVALYADYAKIQSTLSTAYMTAKTASENTSATLDNLRSASTTLQAAIDKAASDKRAFDSANQPLVTAYNQLKTTLQSKTTSLEGLSENKYSSIKNHLSKLFDTGSAITAKTLDPTMGTVPEVLPVTKANEDITTAVSKLTEWKTNADKFNEFVKNPLSKGKLSAGADSAHNQEQPANWSFAGYSVDLTTGSTGNSQNPLNWNFAQRKVWTSEGQQTGKTALVSSPVSATDVSWIYSLAGEGTKYTLTFEYYGPDNAFLYFPYKLVKQADSSSVALQYSLNKTSSKLINFEPAETVSTN…
NC96	573863	575969	-	17	11	ATTGAGTTGTTGTATTTAATATATAAAATAGCTAAAATCCTTTAAAAATC	GAAGAAGAAGAAGAAGAAGAAGAAGAAGAAGAA	GTTCTTAGAAGTTTAGGAGTTAGCGGATGCTCTGATCAGCGAAAATAAAC	VKRKNILKFVSLLGIGSFVMLAAASCTQASTPTPTPTPTPTPTPNPEPKPDPMTPPSGGDMNNPLSGGMNGGDTNPGNGGGTDNAVQQLAAARKTLTDLLGTENTNVALYADYAKIQSTLSTAYMTAKTASENTSATLDNLRSASTTLQAAIDKAASDKRAFDSANQPLVTAYNQLKTTLQSKTTSLEGLSENKYSSIKNHLSKLFDTGSAITAKTLDPTMGTVPEVLPVTKANEDITTAVSKLTEWKTNADKFNEFVKNPLSKGKLSAGADSAHNQEQPANWSFAGYSVDLTTGSTGNSQNPLNWNFAQRKVWTSEGQQTGKTALVSSPVSATDVSWIYSLAGEGTKYTLTFEYYGPDNAFLYFPYKLVKQADSSSVALQYSLNKTSSKLINFEPAET…
Rhigh	487941	490053	+	17	8	AAAACATTTCTCTGAATTTGTTATAAAAATTAGTGAAACCTTTGATTTTC	GAAGAAGAAGAAGAAGAAGAAGAA	GTTCTTAGAAGTTCTGTGGTCTGGGGTTGGTTTGATCAGCGAAAATAAAC	VKRKNILKFVSLLGIGSFVMLAAASCTSATTPTPNPEPKPDPMPNPPSGGMNGGNTPTPNPNPPSGGMNGGDNNPGNDGGMDNAAQQLAAARTALTTLINGETANLASYEDYAKIKNELTAAYETAKAVSAKTGATLNEVNEAKTTLDAAILKAASAKNDFDNKNQPLVTAYNNLKTTLQSKTTSLEGLSENKYSSIKNHLSKLFDTGSAITARTLDPTNGERPTLEKVNEANNGIKMAISFDSLKKWKNNADKFNDFEKKPLSKTQLSTGTDSAHNQEQPANWSFAGYSVDLTTRSTGNSQNLPNLNFAQRKVWTSENQPTGKTALVSSPVSSTDVSWIYSLAGEGTKYTLSFEYYGPDTAFLYFPYKLVKQADSSSVALQYSLNKTSSKLINFEPAK…
Rlow	488036	490148	+	17	11	AAAACATTTCTCTGAATTTGTTATAAAAATTAGTGAAACCTTTGATTTTC	GAAGAAGAAGAAGAAGAAGAAGAAGAAGAAGAA	GTTCTTAGAAGTTCTGTGGTCTGGGGTTGGTTTGATCAGCGAAAATAAAC	VKRKNILKFVSLLGIGSFVMLAAASCTSATTPTPNPEPKPDPMPNPPSGGMNGGNTPTPNPNPPSGGMNGGDNNPGNDGGMDNAAQQLAAARTALTTLINGETANLASYEDYAKIKNELTAAYETAKAVSAKTGATLNEVNEAKTTLDAAILKAASAKNDFDNKNQPLVTAYNNLKTTLQSKTTSLEGLSENKYSSIKNHLSKLFDTGSAITARTLDPTNGERPTLEKVNEANNGIKMAISFDSLKKWKNNADKFNDFEKKPLSKTQLSTGTDSAHNQEQPANWSFAGYSVDLTTRSTGNSQNLPNLNFAQRKVWTSENQPTGKTALVSSPVSSTDVSWIYSLAGEGTKYTLSFEYYGPDTAFLYFPYKLVKQADSSSVALQYSLNKTSSKLINFEPAK…
S6	586613	588743	-	17	11	ATTGAGTTGTTGTATTTAATATATAAAATAGCTAAAATCCTTTAAAAATC	GAAGAAGAAGAAGAAGAAGAAGAAGAAGAAGAA	GTTCTTAGGAGTTCTGGGGTTTTCGTTTGGTCTGATCGGCGAAAATAAAC	VKRKNILKFVSLLGIGSFVMLAAASCTTATTPTPNPEPKPNPNPEPKPNPAPKPDPMPNPGGGMMGGMMGGMMGGMNGGNTNPGNSGGTDNAVQQLAAAKKELSDLLATQNSNLALYADYAKIQNTLTSAYTTAKSTSDNTSATLEQVKSATSTLQTAIDAAASEKKTFDAANPELIKFYNNLKTELQSKTTNLESLNDPQYSGIKDNLNSLYNSASEIVNKTLIPTTGNDLMRTDIEKVNTELMGAVNKLSERKTNADKFNEFVKNPLSKEKLSAGTDSAHNQEQPANWSFAGYSVDLTTGSTSNSQNLPNWNFAQRKVWTSENQPTGKTALVSSPVSSTDVSWIYSLAGEGTKYTLTFEYYGPDNAFLYFPYKLVKQADSSSVALQYSLNKTSSKLI…
VA94	555457	557575	-	17	11	ATTGAGTTGTTGTATTTAATATATAAAATAGCTAAAATCCTTTAAAAATC	GAAGAAGAAGAAGAAGAAGAAGAAGAAGAAGAA	GTTCTTAGAAGTTTAGGAGTTAGCGGATGCTCTGATCAGCGAAAATAAAC	VKRKNILKFVSLLGIGSFVMLAAASCTQASTPTPTPTPTPTPTPTPTPNPEPKPDPMTPPSGGDMNNPLSGGMNGGDTNPGNGGGTDNAVQQLAAARKTLTDLLGTENTNVALYADYAKIQSTLSTAYMTAKTASENTSATLDNLRSASTTLQAAIDKAASDKRAFDSANQPLVTAYNQLKTTLQSKTTSLEGLSENKYSSIKNHLSKLFDTGSAITAKTLDPTMGTVPEVLPVTKANEDITTAVSKLTEWKTNADKFNEFVKNPLSKGKLSAGADSAHNQEQPANWSFAGYSVDLTTGSTGNSQNPLNWNFAQRKVWTSEGQQTGKTALVSSPVSATDVSWIYSLAGEGTKYTLTFEYYGPDNAFLYFPYKLVKQADSSSVALQYSLNKTSSKLINFE…
W101	536401	538531	-	17	6	ATTGAGTTGTTGTATTTAATATATAAAATAGCTAAAATCCTTTAAAAATC	GAAGAAGAAGAAGAAGAA	GTTCTTAGAAGTTTAGGAGTTAGCGGATGCTCTGATCAGCGAAAATAAAC	VKRKNILKFVSLLGIGSFVMLAAASCTQASTPTPTPTPTPTPTPTPTPTPTPNPEPKPDPMTPPSGGDMNNPLSGGMNGGDTNPGNGGGTDNAVQQLAAARKTLTDLLGTENTNVALYADYAKIQSTLSTAYMTAKTASENTSATLDNLRSASTTLQAAIDKAASDKRAFDSANQPLVTAYNQLKTTLQSKTTSLEGLSENKYSSIKNHLSKLFDTGSAITAKTLDPTMGTVPEVLPVTKANEDITTAVSKLTEWKTNADKFNEFVKNPLSKGKLSAGADSAHNQEQPANWSFAGYSVDLTTGSTGNSQNPLNWNFAQRKVWTSEGQQTGKTALVSSPVSATDVSWIYSLAGEGTKYTLTFEYYGPDNAFLYFPYKLVKQADSSSVALQYSLNKTSSKL…
CA06	265397	267836	+	20	7	GAATTGTATTTGTGATTGAAGTATAAATATCAATAAAACCTTTTGTTTTC	GAAGAAGAAGAAGAAGAAGAA	GATCTTAGAAGTTCTGGGTTTTGGGCTTGCTGGATAGGTGAAAATAAATC	VKRKNILKFVSLLGIGSFVMLAAASCTSATTPTPNPEPKPNPNPEPKPDPMPNPPSGGMNGGDTNPGNSGGMDNSAQQLAAAKTEAKAVIDASAELSDSVKEALKRQVDATTTGPAARDLKTKAEALVSAVKALSGSVTAAKTLQAEEQYTNVSQDLKTTLEAKLTAATALLEDGTKLKNLDASSNLDTTKASLESSKTDLDAAVAAVKPDLDFQKTKTNAVSAVEALDTLVNSALKVELQRQVTALDKDHAAQATTMLENLTSLKESLESLQTLVSDGLKMQVDYPQKYYDADNKSAFDDALLKASSVFSAFQWTAKSIMVTAPEGDALPNPRAWTKARDKSEFKLQNFVMAPAQAATPTTTQTSPSAIASAIVKVATGTEETSTMQTAPASQTPTAD…
MC06	265862	268301	+	20	16	GAATTGTATTTGTGATTGAAGTATAAATATCAATAAAACCTTTTGTTTTC	GAAGAAGAAGAAGAAGAAGAAGAAGAAGAAGAAGAAGAAGAAGAAGAA	GATCTTAGAAGTTCTGGGTTTTGGGCTTGCTGGATAGGTGAAAATAAATC	VKRKNILKFVSLLGIGSFVMLAAASCTSATTPTPNPEPKPNPNPEPKPDPMPNPPSGGMNGGDTNPGNSGGMDNSAQQLAAAKTEAKAVIDASAELSDSVKEALKRQVDATTTGPAARDLKTKAEALVSAVKALSGSVTAAKTLQAEEQYTNVSQDLKTTLEAKLTAATALLEDGTKLKNLDASSNLDTTKASLESSKTDLDAAVAAVKPDLDFQKTKTNAVSAVEALDTLVNSALKVELQRQVTALDKDHAAQATTMLENLTSLKESLESLQTLVSDGLKMQVDYPQKYYDADNKSAFDDALLKASSVFSAFQWTAKSIMVTAPEGDALPNPRAWTKARDKSEFKLQNFVMAPAQAATPTTTQTSPSAIASAIVKVATGTEETSTMQTAPASQTPTAD…
NC08	265839	268278	+	20	8	GAATTGTATTTGTGATTGAAGTATAAATATCAATAAAACCTTTTGTTTTC	GAAGAAGAAGAAGAAGAAGAAGAA	GATCTTAGAAGTTCTGGGTTTTGGGCTTGCTGGATAGGTGAAAATAAATC	VKRKNILKFVSLLGIGSFVMLAAASCTSATTPTPNPEPKPNPNPEPKPDPMPNPPSGGMNGGDTNPGNSGGMDNSAQQLAAAKTEAKAVIDASAELSDSVKEALKRQVDATTTGPAARDLKTKAEALVSAVKALSGSVTAAKTLQAEEQYTNVSQDLKTTLEAKLTAATALLEDGTKLKNLDASSNLDTTKASLESSKTDLDAAVAAVKPDLDFQKTKTNAVSAVEALDTLVNSALKVELQRQVTALDKDHAAQATTMLENLTSLKESLESLQTLVSDGLKMQVDYPQKYYDADNKSAFDDALLKASSVFSAFQWTAKSIMVTAPEGDALPNPRAWTKARDKSEFKLQNFVMAPAQAATPTTTQTSPSAIASAIVKVATGTEETSTMQTAPASQTPTAD…
NC95	270819	273258	+	20	8	GAATTGTATTTGTGATTGAAGTATAAATATCAATAAAACCTTTTGTTTTC	GAAGAAGAAGAAGAAGAAGAAGAA	GATCTTAGAAGTTCTGGGTTTTGGGCTTGCTGGATAGGTGAAAATAAATC	VKRKNILKFVSLLGIGSFVMLAAASCTSATTPTPNPEPKPNPNPEPKPDPMPNPPSGGMNGGDTNPGNSGGMDNSAQQLAAAKTEAKAVIDASAELSDSVKEALKRQVDATTTGPAARDLKTKAEALVSAVKALSGSVTAAKTLQAEEQYTNVSQDLKTTLEAKLTAATALLEDGTKLKNLDASSNLDTTKASLESSKTDLDAAVAAVKPDLDFQKTKTNAVSAVEALDTLVNSALKVELQRQVTALDKDHAAQATTMLENLTSLKESLESLQTLVSDGLKMQVDYPQKYYDADNKSAFDDALLKASSVFSAFQWTAKSIMVTAPEGDALPNPRAWTKARDKSEFKLQNFVMAPAQAATPTTTQTSPSAIASAIVKVATGTEETSTMQTAPASQTPTAD…
NC96	270809	273248	+	20	6	GAATTGTATTTGTGATTGAAGTATAAATATCAATAAAACCTTTTGTTTTC	GAAGAAGAAGAAGAAGAA	GATCTTAGAAGTTCTGGGTTTTGGGCTTGCTGGATAGGTGAAAATAAATC	VKRKNILKFVSLLGIGSFVMLAAASCTSATTPTPNPEPKPNPNPEPKPDPMPNPPSGGMNGGDTNPGNSGGMDNSAQQLAAAKTEAKAVIDASAELSDSVKEALKRQVDATTTGPAARDLKTKAEALVSAVKALSGSVTAAKTLQAEEQYTNVSQDLKTTLEAKLTAATALLEDGTKLKNLDASSNLDTTKASLESSKTDLDAAVAAVKPDLDFQKTKTNAVSAVEALDTLVNSALKVELQRQVTALDKDHAAQATTMLENLTSLKESLESLQTLVSDGLKMQVDYPQKYYDADNKSAFDDALLKASSVFSAFQWTAKSIMVTAPEGDALPNPRAWTKARDKSEFKLQNFVMAPAQAATPTTTQTSPSAIASAIVKVATGTEETSTMQTAPASQTPTAD…
NY01	270788	273227	+	20	5	GAATTGTATTTGTGATTGAAGTATAAATATCAATAAAACCTTTTGTTTTC	GAAGAAGAAGAAGAA	GATCTTAGAAGTTCTGGGTTTTGGGCTTGCTGGATAGGTGAAAATAAATC	VKRKNILKFVSLLGIGSFVMLAAASCTSATTPTPNPEPKPNPNPEPKPDPMPNPPSGGMNGGDTNPGNSGGMDNSAQQLAAAKTEAKAVIDASAELSDSVKEALKRQVDATTTGPAARDLKTKAEALVSAVKALSGSVTAAKTLQAEEQYTNVSQDLKTTLEAKLTAATALLEDGTKLKNLDASSNLDTTKASLESSKTDLDAAVAAVKPDLDFQKTKTNAVSAVEALDTLVNSALKVELQRQVTALDKDHAAQATTMLENLTSLKESLESLQTLVSDGLKMQVDYPQKYYDADNKSAFDDALLKASSVFSAFQWTAKSIMVTAPEGDALPNPRAWTKARDKSEFKLQNFVMAPAQAATPTTTQTSPSAIASAIVKVATGTEETSTMQTAPASQTPTAD…
NY01	275988	278427	+	20	9	GAATTGTATTTGTGATTGAAGTATAAATATCAATAAAACCTTTTGTTTTC	GAAGAAGAAGAAGAAGAAGAAGAAGAA	GATCTTAGAAGTTCTGGGTTTTGGGCTTGCTGGATAGGTGAAAATAAATC	VKRKNILKFVSLLGIGSFVMLAAASCTTATTPTPNPEPKPNPNPEPKPDPMPNPPSGGMNGGDTNPGNSGGMDNSAQQLAAAKTEAKAVIDASAELSDSVKEALKRQVDATTTGPAARDLKTKAEALVSAVKALSGSVTAAKTLQAEEQYTNVSQDLKTTLEAKLTAATALLEDGTKLKNLDASSNLDTTKASLESSKTDLDAAVAAVKPDLDFQKTKTNAVSAVEALDTLVNSALKVELQRQVTALDKDHAAQATTMLENLTSLKESLESLQTLVSDGLKMQVDYPQKYYDADNKSAFDDALLKASSVFSAFQWTAKSIMVTAPEGDALPNPRAWTKARDKSEFKLQNFVMAPAQAATPTTTQTSPSAIASAIVKVATGTEETSTMQTAPASQTPTAD…
Rhigh	286653	289041	+	20	7	GTAAATTATTTCTGAATAAACTGTAAAAACGAATAAAAACTTTTGTTTTC	GAAGAAGAAGAAGAAGAAGAA	GTTCTTAGAAGTTTAGAGGTTTGGGGCTCGTCTGTTCGACGAAAATAAAC	VKRKNILKFVSLLGIGSFVMLAAASCTQATTPTPNPNPPSSGMNGGDTNPGNGRGMDNSAQQLAAAKTEAKVVIDASAELSDSVKEALKRQVDATTTGPAARDLKTKAEALVSAVKALSGSVTAAKTLQSEEQYTNVSQDLKTTLEAKLTAATELLEDGTKLKNLDASSNLDTTKASLESSKTDLDAAVATVKPELDFQKTKTSAASAVEALDTLVNSTLKAELQRQVTALDKDHAAQATTMLENLTSLKESLESLQTLVSNGLKMQVDYPRNYYDADNKTAFDDALLKASSVFPAFKWTAESIMVPAATNGALRNPRAWTKARDKSEFKLQNFVMAPAQADTPTTTQTSPSAIASAIVKVATGTEETSTMQTAPAAQTPTANLASTASYLKSLNDTLK…
Rlow	286739	289127	+	20	7	GTAAATTATTTCTGAATAAACTGTAAAAACGAATAAAAACTTTTGTTTTC	GAAGAAGAAGAAGAAGAAGAA	GTTCTTAGAAGTTTAGAGGTTTGGGGCTCGTCTGTTCGACGAAAATAAAC	VKRKNILKFVSLLGIGSFVMLAAASCTQATTPTPNPNPPSSGMNGGDTNPGNGRGMDNSAQQLAAAKTEAKVVIDASAELSDSVKEALKRQVDATTTGPAARDLKTKAEALVSAVKALSGSVTAAKTLQSEEQYTNVSQDLKTTLEAKLTAATELLEDGTKLKNLDASSNLDTTKASLESSKTDLDAAVATVKPELDFQKTKTSAASAVEALDTLVNSTLKAELQRQVTALDKDHAAQATTMLENLTSLKESLESLQTLVSNGLKMQVDYPRNYYDADNKTAFDDALLKASSVFPAFKWTAESIMVPAATNGALRNPRAWTKARDKSEFKLQNFVMAPAQADTPTTTQTSPSAIASAIVKVATGTEETSTMQTAPAAQTPTANLASTASYLKSLNDTLK…
VA94	281557	283996	+	20	10	GAATTGTATTTGTGATTGAAGTATAAATATCAATAAAACCTTTTGTTTTC	GAAGAAGAAGAAGAAGAAGAAGAAGAAGAA	GATCTTAGAAGTTCTGGGTTTTGGGCTTGCTGGATAGGTGAAAATAAATC	VKRKNILKFVSLLGIGSFVMLAAASCTSATTPTPNPEPKPNPNPEPKPDPMPNPPSGGMNGGDTNPGNSGGMDNSAQQLAAAKTEAKAVIDASAELSDSVKEALKRQVDATTTGPAARDLKTKAEALVSAVKALSGSVTAAKTLQAEEQYTNVSQDLKTTLEAKLTAATALLEDGTKLKNLDASSNLDTTKASLESSKTDLDAAVAAVKPDLDFQKTKTNAVSAVEALDTLVNSALKVELQRQVTALDKDHAAQATTMLENLTSLKESLESLQTLVSDGLKMQVDYPQKYYDADNKSAFDDALLKASSVFSAFQWTAKSIMVTAPEGDALPNPRAWTKARDKSEFKLQNFVMAPAQAATPTTTQTSPSAIASAIVKVATGTEETSTMQTAPASQTPTAD…
Rhigh	604235	606500	-	21	17	ATTTAGTTGTTGTATTCACTATATAAAATGGCTAAAAACCTTTAAACATC	GAAGAAGAAGAAGAAGAAGAAGAAGAAGAAGAAGAAGAAGAAGAAGAAGAA	GTTCTTAGAAGTTTTAAGTTTTCAGGCTGTTTTTATGGATGACAATTAAG	VKRKNILKFVSLLGIGSFVMLAAASCTSATTPTPNPTPNPNPPSNGGGMIGGMNGGNTNPGNGGGMDNSAQQLAAAKTEAKVVIDASAELSDSVKEALKRQVDATTTGPAARDLKTKAEALVSAVKALSGSVTAAKTLQAEEQYTNVSQDLKTTLEAKLTAATALLEDGTKLKNLDASSNLDTTKATLESAKSALDAAVSALMPELTFAKTKTNAAAKVTELESLVSPALKAELQTQVDALTKDHATEATTMLANLTSLKESLESLQTLVSDGLKMQVDYPQKYYDADNKSAFDDALLKASSVFPAFQWTAKSIMVPAPEGDALPNPRAWTKDRDKSEFKLQNFVMAPAQAATPTTTQTSPSVTASAIVKVATGTEETSTMQTAPAAQTPTADLASTVS…
Rlow	604390	606655	-	21	13	ATTTAGTTGTTGTATTCACTATATAAAATGGCTAAAAACCTTTAAACATC	GAAGAAGAAGAAGAAGAAGAAGAAGAAGAAGAAGAAGAA	GTTCTTAGAAGTTTTAAGTTTTCAGGCTGTTTTTATGGATGACAATTAAG	VKRKNILKFVSLLGIGSFVMLAAASCTSATTPTPNPTPNPNPPSNGGGMIGGMNGGNTNPGNGGGMDNSAQQLAAAKTEAKVVIDASAELSDSVKEALKRQVDATTTGPAARDLKTKAEALVSAVKALSGSVTAAKTLQAEEQYTNVSQDLKTTLEAKLTAATALLEDGTKLKNLDASSNLDTTKATLESAKSALDAAVSALMPELTFAKTKTNAAAKVTELESLVSPALKAELQTQVDALTKDHATEATTMLANLTSLKESLESLQTLVSDGLKMQVDYPQKYYDADNKSAFDDALLKASSVFPAFQWTAKSIMVPAPEGDALPNPRAWTKDRDKSEFKLQNFVMAPAQAATPTTTQTSPSVTASAIVKVATGTEETSTMQTAPAAQTPTADLASTVS…
F	251355	253422	+	22	19	ATTGAGTTGTTGTATTTAATATATAAAATAGCTAAAATCCTTTAAAAATC	GAAGAAGAAGAAGAAGAAGAAGAAGAAGAAGAAGAAGAAGAAGAAGAAGAAGAAGAA	GTTCTTAGAAGTTCTGTGGTCTGGGGTTGGTTTGATCAGCGAAAATAAAC	VKRKNILKFVSLLGIGSFVMLAAASCTQASTPTPTPTPTPTPTPTPNPEPKPNPGGGDTNNPPSGGMNGVDTNPGGGQGMMNATNQELVNAKKALSDLIGGESKTVELYADYAKIKADLTSAYAVAKTTSDSSTSTLDQVKTATSTLQTAINTAASDKEKFDQQNSQLLMAYKVLKDTLNKKEAIVMSLNQEKYSAILSEINAASSTAEEIVKQTLNPVNGNLPVVDTLNAENTKILEAIKEEKINSEKSNADLFANYQLYKLDRTKLMSEGSNNTKQPGNYSFVAYASDIASPNWNFAQRTVWTADSRTWTSPLPNNSQNSAPLTDVSWIYTLSGTGAKYTLTFDYYGPQTGYLYFPYKLAKTSDKVGLQYKLNQADPVAIQFSEAAATASAPAETDG…
Rhigh	267682	269737	+	22	10	AAAACATTTCTCTGAATTTGTTATAAAAATTAGTGAAACCCTTGATTTTC	GAAGAAGAAGAAGAAGAAGAAGAAGAAGAA	GTTCTTAGAAGTTCTGTGGTCTGGGGTTGGTTTGATCAGCGAAAATAAAC	VKRKNILKFVSLLGIGSFVMLAAASCTQASTPTPTPTPTPTPNPEPKPNPGGGDTNNPPSGGMNGVDTNPGGGQGMMNATNQELVNAKKALSDLIGGESKTVELYADYAKIKADLTSAYAVAKTTSDSSTSTLDQVKTATSTLQTAINTAASDKEKFDQQNSQLLMAYKVLKDTLNKKEAIVMSLNQEKYSAILSEINAASSTAEEIVKQTLNPVNGNLPVVATLNAENTKILEAIKEEKINSEKSNADLFANYQLYKLDRTKLMSEGSNNTKQPGNYSFVAYASDIASPNWNFAQRTVWTADSRTWTSPLPNNSQNSAPLTDVSWIYTLSGTGAKYTLTFDYYGPQTGYLYFPYKLAKTSDKVGLQYKLNQADSVAIQFSEAAATASAPAETDGRQES…
Rhigh	281864	283925	+	22	9	AAAACATTTCTCTGAATTTGTTATAAAAATTAGTGAAACCCTTGATTTTC	GAAGAAGAAGAAGAAGAAGAAGAAGAA	GTTCTTAGAAGTTCTGTGGTCTGGGGTTGGTTTGATCAGCGAAAATAAAC	VKRKNILKFVSLLGIGSFVMLAAASCTQASTPTPTPTPTPTPTPNPEPKPNPGGGDTNNPPSGGMNGVDTNPGGGQGMMNATNQELVNAKKALSDLIGGESKTVELYADYAKIKADLTSAYAVAKTTSDSSTSTLDQVKTATSTLQTAINTAASDKEKFDQQNSQLLMAYKVLKDTLNKKEAIVMSLNQEKYSAILSEINAASSTAEEIVKQTLNPVNGNLPVVATLNAENTKILEAIKEEKINSEKSNADLFANYQLYKLDRTKLMSEGSNNTKQPGNYSFVAYASDIASPNWNFAQRTVWTADSRTWTSPLPNNSQNSAPLTDVSWIYTLSGTGAKYTLTFDYYGPQTGYLYFPYKLAKTSDKVGLQYKLNQADSVAIQFSEAAATASAPAETDGRQ…
Rhigh	830943	833016	-	22	7	AAAACATTTCTCTGAATTTGTTATAAAAATTAGTGAAACCCTTGATTTTC	GAAGAAGAAGAAGAAGAAGAA	GTTCTGTGGTCTGGGGTTGGTTTGATCAGCGAAAATAAACCCGATTTATT	VKRKNILKFVSLLGIGSFVMLAAASCTQASTPTPTPTPTPTPTPTPTPNPEPKPNPGGGDTNNPPSGGMNGVDTNPGGGQGMMNATNQELVNAKKALSDLIGGESKTVELYADYAKIKADLTSAYAVAKTTSDSSTSTLDQVKTATSTLQTAINTAASDKEKFDQQNSQLLMAYKVLKDTLNKKEAIVMSLNQEKYSAILSEINAASSTAEEIVKQTLNPVNGNLPVVATLNAENTKILEAIKEEKINSEKSNADLFANYQLYKLDRTKLMSEGSNNTKQPGNYSFVAYASDIASPNWNFAQRTVWTADSRTWTSPLPNNLQNSAPLTDVSWIYTLSGTGAKYTLTFDYYGPQTGYLYFPYKLVKTSDKVGLQYKLNQADPVAIQFSEAAATASAPAET…
Rlow	267768	269823	+	22	10	AAAACATTTCTCTGAATTTGTTATAAAAATTAGTGAAACCCTTGATTTTC	GAAGAAGAAGAAGAAGAAGAAGAAGAAGAA	GTTCTTAGAAGTTCTGTGGTCTGGGGTTGGTTTGATCAGCGAAAATAAAC	VKRKNILKFVSLLGIGSFVMLAAASCTQASTPTPTPTPTPTPNPEPKPNPGGGDTNNPPSGGMNGVDTNPGGGQGMMNATNQELVNAKKALSDLIGGESKTVELYADYAKIKADLTSAYAVAKTTSDSSTSTLDQVKTATSTLQTAINTAASDKEKFDQQNSQLLMAYKVLKDTLNKKEAIVMSLNQEKYSAILSEINAASSTAEEIVKQTLNPVNGNLPVVATLNAENTKILEAIKEEKINSEKSNADLFANYQLYKLDRTKLMSEGSNNTKQPGNYSFVAYASDIASPNWNFAQRTVWTADSRTWTSPLPNNSQNSAPLTDVSWIYTLSGTGAKYTLTFDYYGPQTGYLYFPYKLAKTSDKVGLQYKLNQADSVAIQFSEAAATASAPAETDGRQES…
Rlow	281938	284005	+	22	9	AAAACATTTCTCTGAATTTGTTATAAAAATTAGTGAAACCCTTGATTTTC	GAAGAAGAAGAAGAAGAAGAAGAAGAA	GTTCTTAGAAGTTCTGTGGTCTGGGGTTGGTTTGATCAGCGAAAATAAAC	VKRKNILKFVSLLGIGSFVMLAAASCTQASTPTPTPTPTPTPTPTPNPEPKPNPGGGDTNNPPSGGMNGVDTNPGGGQGMMNATNQELVNAKKALSDLIGGESKTVELYADYAKIKADLTSAYAVAKTTSDSSTSTLDQVKTATSTLQTAINTAASDKEKFDQQNSQLLMAYKVLKDTLNKKEAIVMSLNQEKYSAILSEINAASSTAEEIVKQTLNPVNGNLPVVATLNAENTKILEAIKEEKINSEKSNADLFANYQLYKLDRTKLMSEGSNNTKQPGNYSFVAYASDIASPNWNFAQRTVWTADSRTWTSPLPNNSQNSAPLTDVSWIYTLSGTGAKYTLTFDYYGPQTGYLYFPYKLAKTSDKVGLQYKLNQADSVAIQFSEAAATASAPAETDG…
Rlow	831149	833216	-	22	7	AAAACATTTCTCTGAATTTGTTATAAAAATTAGTGAAACCCTTGATTTTC	GAAGAAGAAGAAGAAGAAGAA	GTTCTGTGGTCTGGGGTTGGTTTGATCAGCGAAAATAAACCCGATTTATT	VKRKNILKFVSLLGIGSFVMLAAASCTQASTPTPTPTPTPTPTPTPNPEPKPNPGGGDTNNPPSGGMNGVDTNPGGGQGMMNATNQELVNAKKALSDLIGGESKTVELYADYAKIKADLTSAYAVAKTTSDSSTSTLDQVKTATSTLQTAINTAASDKEKFDQQNSQLLMAYKVLKDTLNKKEAIVMSLNQEKYSAILSEINAASSTAEEIVKQTLNPVNGNLPVVATLNAENTKILEAIKEEKINSEKSNADLFANYQLYKLDRTKLMSEGSNNTKQPGNYSFVAYASDIASPNWNFAQRTVWTADSRTWTSPLPNNLQNSAPLTDVSWIYTLSGTGAKYTLTFDYYGPQTGYLYFPYKLVKTSDKVGLQYKLNQADPVAIQFSEAAATASAPAETDG…
S6	806718	808674	-	22	4	ATAAATTATTTCTGAATTAACTGTAAAAACGAATGAAAGCTTTTGTTTTC	GAAGAAGAAGAA	GTTCTTAGGAGTTCTGGGGTTTGAGGATCGTTTGATCAGCGAAAATAAAC	VKRKNILKFVSLLGIGSFVMLAAASCTTPVNPTPNPEPKPTPNPEPKPNPGGGDMNNHPSGGMNGGDTNPGDGQGMMNATNQELVNAKKALSDLIGGESKTVELYADYAKIKSTLTTAYTTAKTTSNSSTATLDQVKAATSTLQTAINTAASDKEKFDQQNSQLLMAYKVLKDTLNKKEAIVMSLNQEKYSAILNEINAASSTAEEIVKQTLNPVNGNLPVVDTLNAENTKILEAIKEEKINSEKSNADLFANYQLYKLDRTKLMSEGSNNTQQPGNYSFVAYASDIASPNWNFAQRTIWTNGHTPTKIDSVANSDQSTTQPLSNVSWIYSLTGSNSKYTLEFTYYGPKTAYLYFPYKLVSTNDGSRVGLEYKLNDATEPTEITFGDEATMNGKTPTIS…
MC06	268674	270759	+	23	8	ATTGAGTTGTTGTATTTAATATATAAAATAGCTAAAATCCTTTAAAAATC	GAAGAAGAAGAAGAAGAAGAAGAA	GTTCTTAGAAGTTAGGGGAGTTTGGTCTGGCTTGATCTGCGAAAATAAAC	VKRKNILKFVSLLGIGSFVMLAAASCTTPVNPTPNPTPNPTPNPTPNPQPKPDPMPNPGGGMMGGNTNPGNGGGTDNAAQQLAEAKAALTTLLNTKSEKVGLYSDYANI
Rhigh	255818	256400	+	23	8	ATTTAGTTGTTGTATTCACTATATAAAATGGCTAAAAATCTTTAAACATC	GAAGAAGAAGAAGAAGAAGAAGAA	GTTCTTAGAAGTTTTAAGGCCGTATTTATGGGCGACAATTATGCCGATTT	VKRKNILKFVSLLGIGSFVMLAAASCTSATTPTPNPTPNPTPNPTPNPTPNPEPNPPSGGMNGGNTNPGGGQGMMDSAAQELTAARTALTSLLASKNANVEMYSDYAKIKNDLTAAYTTAKSTSDNTSAALEQVKSATSTLQTAIDKAASDKNDFNNQNADLVSAYTSLKDAVKSETTNLVRFVWCKLYSHKR
Rhigh	270003	270591	+	23	6	GTAAATTATTTCTGAATTAACTGTAAAAACGAATGAAAGCTTTTGTTTTC	GAAGAAGAAGAAGAAGAA	GTTCTTAGAAGTTTTAAGGCCGTATTTATGGGCGACAATTATGCCGATTT	VKRKNILKFVSLLGIGSFVMLAAASCTSATTPTPNPTPNPTPNPTPNPTPNPEPKPNPPSGGMNGGNTNPGGGQGMMDSAAQELTAARTALTSLLASKNANVEMYSDYAKIKNDLTAAYTTAKSTSDNTSAALEQVKSATSTLQTAIDKAASDKNDFNNQNADLVSAYTSLKDAVKSETTNLVRFVWCKLYSHKR
Rlow	255877	256471	+	23	10	ATTTAGTTGTTGTATTCACTATATAAAATGGCTAAAAATCTTTAAACATC	GAAGAAGAAGAAGAAGAAGAAGAAGAAGAA	GTTCTTAGAAGTTTTAAGGCCGTATTTATGGGCGACAATTATGCCGATTT	VKRKNILKFVSLLGIGSFVMLAAASCTSATTPTPNPTPNPTPNPTPNPTPNPTPNPEPNPPSGGMNGGNTNPGGGQGMMDSAAQELTAARTALTSLLASKNANVEMYSDYAKIKNDLTAAYTTAKSTSDNTSAALEQVKSATSTLQTAIDKAASDKNDFNNQNADLVSAYTSLKDAVKSETTNLVRFVWCKLYSHKR
Rlow	270092	270668	+	23	7	GTAAATTATTTCTGAATTAACTGTAAAAACGAATGAAAGCTTTTGTTTTC	GAAGAAGAAGAAGAAGAAGAA	GTTCTTAGAAGTTTTAAGGCCGTATTTATGGGCGACAATTATGCCGATTT	VKRKNILKFVSLLGIGSFVMLAAASCTSATTPTPNPTPNPTPNPTPNPEPKPNPPSGGMNGGNTNPGGGQGMMDSAAQELTAARTALTSLLASKNANVEMYSDYAKIKNDLTAAYTTAKSTSDNTSAALEQVKSATSTLQTAIDKAASDKNDFNNQNADLVSAYTSLKDAVKSETTNLVRFVWCKLYSHKR
S6	812654	813461	-	23	19	ATAAATTTTTATGAATTAACATAAAAAATCGTCAAAATCCTTTATTTCTA	GAAGAAGAAGAAGAAGAAGAAGAAGAAGAAGAAGAAGAAGAAGAAGAAGAAGAAGAA	GTAGAAGTTCTTAGAAGTTTAGGAGTTAGTGACTGCTCTGATCAGCGAAA	VKRKNILKFVSLLGIGSFVMLAAASCTTSVNPTPNPTPNPTPNPTPNPTPNPTPNPTPNPNPPSGGMTGGDTNPGDGQGMMNAAAKELADAKAALTSLLSSKNQKVGLYSDYAKIQNTLTAAYTTAEQTSQNSSATLEQVKNATSTLQTTIDAAASDKNDFNNQNADLVSAYTSLKDAVKSETTNLEGLSHANYTAIKDNLTTYYGKAKDILTATLYPASGEIPKVDAVKVVNNFITNANSNIEQWKNNANMLSDSFLKKTLDKQQFK
CA06	792526	794623	-	24	8	AAAACATTTCTCTGAATTTGCTATAAAAATTAGTGAAACCTTTGGTTTGC	GAAGAAGAAGAAGAAGAAGAAGAA	GTTTTTAGGAGTTCTGGAGCTTTGGTTTGGCTTGATGAGCGAAAATAAAT	VKRKNILKFVSLLGIGSFVMLAAASCTTATTPTPNPEPNPTPNPEPTPTPNPTPPSNGGGMNGGDTNPGNGGGTDNAAQQLSTAKTALTNLLNGQTEKVVLYNDYAKIKDQLVKAYIAAKEISDKSDATLQEINNAKTTLETAITTAANLKTSFDEKNPELIKAYNALKETIISEEMSLKQLTGANFETIKNHISNLYKQGKDIITATLDPITGDGPQAMVVNQANEAIVNATSKLEDWKTNATNLATRFVKQTLNNANLVNETNNQPQPGNYSFVAYSVDLNTGISTASNTPNWNFAQRKVWVSGSGGRTSPFSSSDANNSPALTDVSWIYNLSGANSKYTLTFNWYGPSTGHLYFPYKLVKSDDAQNVGLQYTLNNKPAQRIEFAPAQSPSSGGTAH…
F	497265	499338	+	24	13	AATCGTAGTTGTGGTCGAAGTATAAATATCAACAAAACCCTTTTTTTATC	GAAGAAGAAGAAGAAGAAGAAGAAGAAGAAGAAGAAGAA	GTTTTTAGAAGTTTAGGGGTATGGAGTTGGGCAAGTGAGCGAAAATAAAC	VKRKNILKFVSLLGIGSFVMLAAASCTSATTPTPNPTPTPNPEPKPDPMPNPPSGGMMGDNPNPGNDGGMDNSAQQLSAAKTALTNLLNGQTEKVGLYNDYAKIKDQLVKAYTAAKEISDKSDATLQEVNNAKTTLEIAITTAASSKTSFDEKNSELIKAYNALKQTITSEEMQLNLLTGANFETIKNHISNLYKQGKDIITATLDPTTGDGPQTMVVNQTNEAIVNATSKLDDWKNNASTLNTSFLKETLKSASLSAATGDGAATVQQQPGNYSFVAYASDITSPNWNFAQRKVWVSTSGGRTSPFSNSDANNSPELTDVSWIYNLSGANSKYTLKFNYYGPSTGHLYFPYKLVKSNDAQNVGLQYTLNNKPAQRIEFAPAQSTSPGETAPASSPQSP…
MC06	537255	539352	-	24	12	AAAACATTTCTCTGAATTTGCTATAAAAATTAGTGAAACCTTTGGTTTGC	GAAGAAGAAGAAGAAGAAGAAGAAGAAGAAGAAGAA	GTTCTTAGGAGTTCTGGAGCTTTGGTTTGGCTTGATGAGCGAAAATAAAT	VKRKNILKFVSLLGIGSFVMLAAASCTTATTPTPNPKPNPTPNPEPTPTPNPTPPSNGGGMNGGDTNPGNGGGTDNAAQQLSTAKTALTNLLNGQTEKVVLYNDYAKIKDQLVKAYIAAKEISDKSDATLQEINNAKTTLETAITTAANLKTSFDEKNPELIKAYNALKETIISEEMSLKQLTGANFETIKNHISNLYKQGKDIITATLDPITGDGPQAMVVNQANEAIVNATSKLEDWKTNATNLATRFVKQTLNNANLVNETNNQPQPGNYSFVAYSVDLNTGISTASNTPNWNFAQRKVWVSGSGGRTSPFSSSDANNSPALTDVSWIYNLSGANSKYTLTFNWYGPSTGHLYFPYKLVKSDDAQNVGLQYTLNNKPAQRIEFAPAQSPSSGGTAH…
MC06	768330	770427	-	24	10	AAAACATTTCTCTGAATTTGCTATAAAAATTAGTGAAACCTTTGGTTTGC	GAAGAAGAAGAAGAAGAAGAAGAAGAAGAA	GTTCTTAGGAGTTCTGGAGCTTTGGTTTGGCTTGATGAGCGAAAATAAAT	VKRKNILKFVSLLGIGSFVMLAAASCTTATTPTPNPEPNPTPNPEPTPTPNPTPPSNGGGMNGGDTNPGNGGGTDNAAQQLSTAKTALTNLLNGQTEKVVLYNDYAKIKDQLVKAYIAAKEISDKSDATLQEINNAKTTLETAITTAANLKTSFDEKNPELIKAYNALKETIISEEMSLKQLTGANFETIKNHISNLYKQGKDIITATLDPITGDGPQAMVVNQANEAIVNATSKLEDWKTNATNLATRFVKQTLNNANLVNETNNQPQPGSYSFVAYSVDLNTGISTASNTPNWNFAQRKVWVSGSGGRTSPFSSSDANNSPALTDVSWIYNLSGANSKYTLTFNWYGPSTGHLYFPYKLVKSDDAQNVGLQYTLNNKPAQRIEFAPAQSPSSGGTAH…
NC08	763341	765438	-	24	19	AAAACATTTCTCTGAATTTGCTATAAAAATTAGTGAAACCTTTGGTTTGC	GAAGAAGAAGAAGAAGAAGAAGAAGAAGAAGAAGAAGAAGAAGAAGAAGAAGAAGAA	GTTCTTAGGAGTTCTGGAGCTTTGGTTTGGCTTGATGAGCGAAAATAAAT	VKRKNILKFVSLLGIGSFVMLAAASCTTATTPTPNPEPNPTPNPEPTPTPNPTPPSNGGGMNGGDTNPGNGGGTDNAAQQLSTAKTALTNLLNGQTEKVVLYNDYAKIKDQLVKAYIAAKEISDKSDATLQEINNAKTTLETAITTAANLKTSFDEKNPELIKAYNALKETIISEEMSLKQLTGANFETIKNHISNLYKQGKDIITATLDPITGDGPQAMVVNQANEAIVNATSKLEDWKTNATNLATRFVKQTLNNANLVNETNNQPQPGSYSFVAYSVDLNTGISTASNTPNWNFAQRKVWVSGSGGRTSPFSSSDANNSPALTDVSWIYNLSGANSKYTLTFNWYGPSTGHLYFPYKLVKSDDAQNVGLQYTLNNKPAQRIEFAPAQSPSSGGTAH…
NC95	768977	771074	-	24	13	AAAACATTTCTCTGAATTTGCTATAAAAATTAGTGAAACCTTTGGTTTGC	GAAGAAGAAGAAGAAGAAGAAGAAGAAGAAGAAGAAGAA	GTTCTTAGGAGTTCTGGAGCTTTGGTTTGGCTTGATGAGCGAAAATAAAT	VKRKNILKFVSLLGIGSFVMLAAASCTTATTPTPNPEPNPTPNPEPTPTPNPTPPSNGGGMNGGDTNPGNGGGTDNAAQQLSTAKTALTNLLNGQTEKVVLYNDYAKIKDQLVKAYIAAKEISDKSDATLQEINNAKTTLETAITTAANLKTSFDEKNPELIKAYNALKETIISEEMSLKQLTGANFETIKNHISNLYKQGKDIITATLDPITGDGPQAMVVNQANEAIVNATSKLEDWKTNATNLATRFVKQTLNNANLVNETNNQPQPGNYSFVAYSVDLNTGISTASNTPNWNFAQRKVWVSGSGGRTSPFSSSDANNSPALTDVSWIYNLSGANSKYTLTFNWYGPSTGHLYFPYKLVKSDDAQNVGLQYTLNNKPAQRIEFAPAQSPSSGGTAH…
NC96	801848	803945	-	24	8	AAAACATTTCTCTGAATTTGCTATAAAAATTAGTGAAACCTTTGGTTTGC	GAAGAAGAAGAAGAAGAAGAAGAA	GTTCTTAGGAGTTCTGGAGCTTTGGTTTGGCTTGATGAGCGAAAATAAAT	VKRKNILKFVSLLGIGSFVMLAAASCTTATTPTPNPEPNPTPNPEPTPTPNPTPPSNGGGMNGGDTNPGNGGGTDNAAQQLSTAKTALTNLLNGQTEKVVLYNDYAKIKDQLVKAYIAAKEISDKSDATLQEINNAKTTLETAITTAANLKTSFDEKNPELIKAYNALKETIISEEMSLKQLTGANFETIKNHISNLYKQGKDIITATLDPITGDGPQAMVVNQANEAIVNATSKLEDWKTNATNLATRFVKQTLNNANLVNETNNQPQPGNYSFVAYSVDLNTGISTASNTPNWNFAQRKVWVSGSGGRTSPFSSSDANNSPALTDVSWIYNLSGANSKYTLTFNWYGPSTGHLYFPYKLVKSDDAQNVGLQYTLNNKPAQRIEFAPAQSPSSGGTAH…
NY01	780733	782830	-	24	11	AAAACATTTCTCTGAATTTGCTATAAAAATTAGTGAAACCTTTGGTTTGC	GAAGAAGAAGAAGAAGAAGAAGAAGAAGAAGAA	GTTCTTAGGAGTTCTGGAGCTTTGGTTTGGCTTGATGAGCGAAAATAAAT	VKRKNILKFVSLLGIGSFVMLAAASCTTATTPTPNPEPNPTPNPEPTPTPNPTPPSNGGGMNGGDTNPGNGGGTDNAAQQLSTAKTALTNLLNGQTEKVVLYNDYAKIKDQLVKAYIAAKEISDKSDATLQEINNAKTTLETAITTAANLKTSFDEKNPELIKAYNALKETIISEEMSLKQLTGANFETIKNHISNLYKQGKDIITATLDPITGDGPQAMVVNQANEAIVNATSKLEDWKTNATNLATRFVKQTLNNANLVNETNNQPQPGNYSFVAYSVDLNTGISTASNTPNWNFAQRKVWVSGSGGRTSPFSSSDANNSPALTDVSWIYNLSGANSKYTLTFNWYGPSTGHLYFPYKLVKSDDAQNVGLQYTLNNKPAQRIEFAPAQSPSSGGTAH…
Rhigh	262901	264998	+	24	8	TAACTGTATGTGGTTTCAACTATAAAAACTTATAAAATCCTTTGTTTTTC	GAAGAAGAAGAAGAAGAAGAAGAA	GTTCTTAGGAGTTCTGGGGTTTGGGAATCCTGTGATCAGCGAAAATTAAG	VKRKNILKFVSLLGIGSFVMLAAASCTTPVNPTPNPTPTPNPEPNPTPNPEPKPNPPSGGMNGRDTNPGNGGGTDNAAQQLAAAKTALTTLLNTKSEKVGLYSDYAKIKDQLVKAYTAAKEISDKSDATLQEVNNAKTRLETAIKDAANSKTSFGEKNPELIKAYDALKQTITSEEMSLNQLMDANFETIKNHISNLYKQGKDIITATLDPTTGDGPQAMVVNQTNEAIVNATSKIEDWKTNATNLATRFVKQTLNNANLVNETNNQPQPGSYSFVAYSVDLNTGVSTASNTPNWNFAQRKVWVSGSGGRTSPFSSSDANNSPALTDVSWIYNLSGANSKYTLTFNWYGPSTGHLYFPYKLVKSDDAQNVGLQYTLNNKPAQRIEFAPAQSPSSGGTAH…
Rhigh	277083	279180	+	24	8	TAACTGTATGTGGTTTCAACTATAAAAACTTATAAAATCCTTTGTTTTTC	GAAGAAGAAGAAGAAGAAGAAGAA	GTTCTTAGGAGTTCTGGGGTTTGGGAATCCTGTGATCAGCGAAAATTAAG	VKRKNILKFVSLLGIGSFVMLAAASCTTPVNPTPNPTPTPNPEPNPTPNPEPKPNPPSGGMNGRDTNPGNGGGTDNAAQQLAAAKTALTTLLNTKSEKVGLYSDYAKIKDQLVKAYTAAKEISDKSDATLQEVNNAKTRLETAIKDAANSKTSFGEKNPELIKAYDALKQTITSEEMSLNQLMDANFETIKNHISNLYKQGKDIITATLDPTTGDGPQAMVVNQTNEAIVNATSKIEDWKTNATNLATRFVKQTLNNANLVNETNNQPQPGSYSFVAYSVDLNTGVSTASNTPNWNFAQRKVWVSGSGGRTSPFSSSDANNSPALTDVSWIYNLSGANSKYTLTFNWYGPSTGHLYFPYKLVKSDDAQNVGLQYTLNNKPAQRIEFAPAQSPSSGGTAH…
Rlow	262984	265081	+	24	11	TAACTGTATGTGGTTTCAACTATAAAAACTTATAAAATCCTTTGTTTTTC	GAAGAAGAAGAAGAAGAAGAAGAAGAAGAAGAA	GTTCTTAGGAGTTCTGGGGTTTGGGAATCCTGTGATCAGCGAAAATTAAG	VKRKNILKFVSLLGIGSFVMLAAASCTTPVNPTPNPTPTPNPEPNPTPNPEPKPNPPSGGMNGRDTNPGNGGGTDNAAQQLAAAKTALTTLLNTKSEKVGLYSDYAKIKDQLVKAYTAAKEISDKSDATLQEVNNAKTRLETAIKDAANSKTSFGEKNPELIKAYDALKQTITSEEMSLNQLMDANFETIKNHISNLYKQGKDIITATLDPTTGDGPQAMVVNQTNEAIVNATSKIEDWKTNATNLATRFVKQTLNNANLVNETNNQPQPGSYSFVAYSVDLNTGVSTASNTPNWNFAQRKVWVSGSGGRTSPFSSSDANNSPALTDVSWIYNLSGANSKYTLTFNWYGPSTGHLYFPYKLVKSDDAQNVGLQYTLNNKPAQRIEFAPAQSPSSGGTAH…
Rlow	277172	279269	+	24	11	TAACTGTATGTGGTTTCAACTATAAAAACTTATAAAATCCTTTGTTTTTC	GAAGAAGAAGAAGAAGAAGAAGAAGAAGAAGAA	GTTCTTAGGAGTTCTGGGGTTTGGGAATCCTGTGATCAGCGAAAATTAAG	VKRKNILKFVSLLGIGSFVMLAAASCTTPVNPTPNPTPTPNPEPNPTPNPEPKPNPPSGGMNGRDTNPGNGGGTDNAAQQLAAAKTALTTLLNTKSEKVGLYSDYAKIKDQLVKAYTAAKEISDKSDATLQEVNNAKTRLETAIKDAANSKTSFGEKNPELIKAYDALKQTITSEEMSLNQLMDANFETIKNHISNLYKQGKDIITATLDPTTGDGPQAMVVNQTNEAIVNATSKIEDWKTNATNLATRFVKQTLNNANLVNETNNQPQPGSYSFVAYSVDLNTGVSTASNTPNWNFAQRKVWVSGSGGRTSPFSSSDANNSPALTDVSWIYNLSGANSKYTLTFNWYGPSTGHLYFPYKLVKSDDAQNVGLQYTLNNKPAQRIEFAPAQSPSSGGTAH…
W101	755625	757722	-	24	8	AAAACATTTCTCTGAATTTGCTATAAAAATTAGTGAAACCTTTGGTTTGC	GAAGAAGAAGAAGAAGAAGAAGAA	GTTCTTAGGAGTTCTGGAGCTTTGGTTTGGCTTGATGAGCGAAAATAAAT	VKRKNILKFVSLLGIGSFVMLAAASCTTATTPTPNPEPNPTPNPEPTPTPNPTPPSNGGGMNGGDTNPGNGGGTDNAAQQLSTAKTALTNLLNGQTEKVVLYNDYAKIKDQLVKAYIAAKEISDKSDATLQEINNAKTTLETAITTAANLKTSFDEKNPELIKAYNALKETIISEEMSLKQLTGANFETIKNHISNLYKQGKDIITATLDPITGDGPQAMVVNQANEAIVNATSKLEDWKTNATNLATRFVKQTLNNANLVNETNNQPQPGNYSFVAYSVDLNTGISTASNTPNWNFAQRKVWVSGSGGRTSPFSSSDANNSPALTDVSWIYNLSGANSKYTLTFNWYGPSTGHLYFPYKLVKSDDAQNVGLQYTLNNKPAQRIEFAPAQSPSFGGTAH…
Rhigh	838046	840170	-	25	6	CATTTTACATTTAGTCAAAAAACCGACGAAAGTCTTTGTTTATAAACCAA	GAAGAAGAAGAAGAAGAA	GTTCTTAGAAGTTCAGGAGTGTCGGGTTGAGCTAGTGAGCGAAAATTAAG	VKRKNILKFVSLLGIGSFVMLAAASCTSATTPTPNPEPKPNPEPKPDPMPNPPSGGNMNGGDTNPGNGGGMDNAVQQLAAAKTALTTLLNGQTEKVGLYNDYAKIKDDLVKAYIAAKEISDKSHATLQEVNNAKTRLETAIKDAANSKTSFGEKNPELIKAYDALKQTITSEEMSLNQLMDANFETIKNHISNLYKQGKDIITATLDPTTGDGPQAMVVNQTNEAIVNATSKIEDWKTNATNLATRFVKQTLNNANLVNETNNQPQPGSYSFVAYSVDLNTGVSTASNTPNWNFAQRKVWVSGSGGRTSPFSSSDANNSPALTDVSWIYNLSGANSKYTLTFNWYGPSTGHLYFPYKLVKSDDAQNVGLQYTLNNKPAQRIEFAPAQSPSSGGTAHASD…
Rlow	838234	840358	-	25	7	CATTTTACATTTAGTCAAAAAACCGACGAAAGTCTTTGTTTATAAACCAA	GAAGAAGAAGAAGAAGAAGAA	GTTCTTAGAAGTTCAGGAGTGTCGGGTTGAGCTAGTGAGCGAAAATTAAG	VKRKNILKFVSLLGIGSFVMLAAASCTSATTPTPNPEPKPNPEPKPDPMPNPPSGGNMNGGDTNPGNGGGMDNAVQQLAAAKTALTTLLNGQTEKVGLYNDYAKIKDDLVKAYIAAKEISDKSHATLQEVNNAKTRLETAIKDAANSKTSFGEKNPELIKAYDALKQTITSEEMSLNQLMDANFETIKNHISNLYKQGKDIITATLDPTTGDGPQAMVVNQTNEAIVNATSKIEDWKTNATNLATRFVKQTLNNANLVNETNNQPQPGSYSFVAYSVDLNTGVSTASNTPNWNFAQRKVWVSGSGGRTSPFSSSDANNSPALTDVSWIYNLSGANSKYTLTFNWYGPSTGHLYFPYKLVKSDDAQNVGLQYTLNNKPAQRIEFAPAQSPSSGGTAHASD…
CA06	255804	257886	+	26	4	AAAACATTTCTCTGAATTTGTTATAAAAATTATTAAAACTTTTTATTTTC	GAAGAAGAAGAA	GTTCTTAGGAGTTCTGGGGTTTGGGAATCCTGTGATCTGCGAAAATTAAG	VKRKNILKFVSLLGIGSFVMLAAASCTSATTPTPNPEPKPDPMPNPPSGGMNGGNTNPGNGGGMMGDNPNPGNTTPKQQLAAARKTLTDLLGTENTNVALYADYAKIQSTLSTAYMTAKTASENTSATLDNLRSASTTLQAAIDKAASDKRAFDSANQSLVAAYNNLKTTLQSKTNSLEGLSENKYSGIKNHLSKLFDAGSAITARTLDPTSGERPTLEKVNEANNGIKMAISSESLNKWKTNADKFNDFEKNPLSKEKLESTNDTAHNQEQPANWSFAAYSVDLTSNSQNLPNWNFAQRKVWTSEGQEGGRTVLVSSPVSSTDVSWIYSLAGEGTKYTLSFEYYGPDTAFLYFPYKLVKQADSNSVALQYSLNKASPKLINFQPVRTEPANADSTTNE…
F	253707	255777	+	26	8	ATTGAGTTGTTGTATTTAATATATAAAACAGCTAAAATCCTTTAGAAATC	GAAGAAGAAGAAGAAGAAGAAGAA	GTTCTTAGGAGTTTAGGAATGTTGGATTGGCCTAGTGAGCGAAAATAAAC	VKRKNILKFVSLLGIGSFVMLAAASCTSATTPTPNPTPTPNPEPNPMPNPGGGVGMSDGNTNPGNGGGMMGDNPNPGNTTPKQQLAAARKTLTDLLGTENTNVALYADYAKIQSTLSTAYMTAKTASENTSATLDNLRSASTTLQAAIDKAASDKRAFDSANQSLVAAYNNLKTTLQSKTTSLEGLSENKYSGIKNHLSKLFDTGSAITARTLDPTSGERPTLLEKVNEANNGIKMAISSESLNKWKTNADKFNDFEKNPLSKEKLESTNDTAHNQEQPANWSFAAYSVDLTSNSQNLPNWNFAQRKVWTSEGQEGGRTVLVSSPVSSTDVSWIYSLAGEGTKYTLSFEYYGPDTAFLYFPYKLVKQADSNSVALQYSLNKASPKLINFQPVRTEPANA…
MC06	256245	258327	+	26	9	AAAACATTTCTCTGAATTTGTTATAAAAATTATTAAAACTTTTTATTTTC	GAAGAAGAAGAAGAAGAAGAAGAAGAA	GTTCTTAGGAGTTCTGGGGTTTGGGAATCCTGTGATCTGCGAAAATTAAG	VKRKNILKFVSLLGIGSFVMLAAASCTSATTPTPNPEPKPDPMPNPPSGGMNGGNTNPGNGGGMMGDNPNPGNTTPKQQLAAARKTLTDLLGTENTNVALYADYAKIQSTLSTAYMTAKTASENTSATLDNLRSASTTLQAAIDKAASDKRAFDSANQSLVAAYNNLKTTLQSKTNSLEGLSENKYSGIKNHLSKLFDAGSAITARTLDPTSGERPTLEKVNEANNGIKMAISSESLNKWKTNADKFNDFEKNPLSKEKLESTNDTAHNQEQPANWSFAAYSVDLTSNSQNLPNWNFAQRKVWTSEGQEGGRTVLVSSPVSSTDVSWIYSLAGEGTKYTLSFEYYGPDTAFLYFPYKLVKQADSNSVALQYSLNKASPKLINFQPVRTEPANADSTTNE…
NC08	256246	258328	+	26	8	AAAACATTTCTCTGAATTTGTTATAAAAATTATTAAAACTTTTTATTTTC	GAAGAAGAAGAAGAAGAAGAAGAA	GTTCTTAGGAGTTCTGGGGTTTGGGAATCCTGTGATCTGCGAAAATTAAG	VKRKNILKFVSLLGIGSFVMLAAASCTSATTPTPNPEPKPDPMPNPPSGGMNGGNTNPGNGGGMMGDNPNPGNTTPKQQLAAARKTLTDLLGTENTNVALYADYAKIQSTLSTAYMTAKTASENTSATLDNLRSASTTLQAAIDKAASDKRAFDSANQSLVAAYNNLKTTLQSKTNSLEGLSENKYSGIKNHLSKLFDAGSAITARTLDPTSGERPTLEKVNEANNGIKMAISSESLNKWKTNADKFNDFEKNPLSKEKLESTNDTAHNQEQPANWSFAAYSVDLTSNSQNLPNWNFAQRKVWTSEGQEGGRTVLVSSPVSSTDVSWIYSLAGEGTKYTLSFEYYGPDTAFLYFPYKLVKQADSNSVALQYSLNKASPKLINFQPVRTEPANADSTTNE…
NC95	261229	263311	+	26	6	AAAACATTTCTCTGAATTTGTTATAAAAATTATTAAAACTTTTTATTTTC	GAAGAAGAAGAAGAAGAA	GTTCTTAGGAGTTCTGGGGTTTGGGAATCCTGTGATCTGCGAAAATTAAG	VKRKNILKFVSLLGIGSFVMLAAASCTSATTPTPNPEPKPDPMPNPPSGGMNGGNTNPGNGGGMMGDNPNPGNTTPKQQLAAARKTLTDLLGTENTNVALYADYAKIQSTLSTAYMTAKTASENTSATLDNLRSASTTLQAAIDKAASDKRAFDSANQSLVAAYNNLKTTLQSKTNSLEGLSENKYSGIKNHLSKLFDAGSAITARTLDPTSGERPTLEKVNEANNGIKMAISSESLNKWKTNADKFNDFEKNPLSKEKLESTNDTAHNQEQPANWSFAAYSVDLTSNSQNLPNWNFAQRKVWTSEGQEGGRTVLVSSPVSSTDVSWIYSLAGEGTKYTLSFEYYGPDTAFLYFPYKLVKQADSNSVALQYSLNKASPKLINFQPVRTEPANADSTTNE…
NC96	261204	263286	+	26	9	AAAACATTTCTCTGAATTTGTTATAAAAATTATTAAAACTTTTTATTTTC	GAAGAAGAAGAAGAAGAAGAAGAAGAA	GTTCTTAGGAGTTCTGGGGTTTGGGAATCCTGTGATCTGCGAAAATTAAG	VKRKNILKFVSLLGIGSFVMLAAASCTSATTPTPNPEPKPDPMPNPPSGGMNGGNTNPGNGGGMMGDNPNPGNTTPKQQLAAARKTLTDLLGTENTNVALYADYAKIQSTLSTAYMTAKTASENTSATLDNLRSASTTLQAAIDKAASDKRAFDSANQSLVAAYNNLKTTLQSKTNSLEGLSENKYSGIKNHLSKLFDAGSAITARTLDPTSGERPTLEKVNEANNGIKMAISSESLNKWKTNADKFNDFEKNPLSKEKLESTNDTAHNQEQPANWSFAAYSVDLTSNSQNLPNWNFAQRKVWTSEGQEGGRTVLVSSPVSSTDVSWIYSLAGEGTKYTLSFEYYGPDTAFLYFPYKLVKQADSNSVALQYSLNKASPKLINFQPVRTEPANADSTTNE…
NY01	261177	263259	+	26	11	AAAACATTTCTCTGAATTTGTTATAAAAATTATTAAAACTTTTTATTTTC	GAAGAAGAAGAAGAAGAAGAAGAAGAAGAAGAA	GTTCTTAGGAGTTCTGGGGTTTGGGAATCCTGTGATCTGCGAAAATTAAG	VKRKNILKFVSLLGIGSFVMLAAASCTSATTPTPNPEPKPDPMPNPPSGGMNGGNTNPGNGGGMMGDNPNPGNTTPKQQLAAARKTLTDLLGTENTNVALYADYAKIQSTLSTAYMTAKTASENTSATLDNLRSASTTLQAAIDKAASDKRAFDSANQSLVAAYNNLKTTLQSKTNSLEGLSENKYSGIKNHLSKLFDAGSAITARTLDPTSGERPTLEKVNEANNGIKMAISSESLNKWKTNADKFNDFEKNPLSKEKLESTNDTAHNQEQPANWSFAAYSVDLTSNSQNLPNWNFAQRKVWTSEGQEGGRTVLVSSPVSSTDVSWIYSLAGEGTKYTLSFEYYGPDTAFLYFPYKLVKQADSNSVALQYSLNKASPKLINFQPVRTEPANADSTTNE…
Rhigh	284210	286337	+	26	9	GTAAATTATTTCTGAATTAACTGTAAAAACGAATGAAAGCTTTTGTTTTC	GAAGAAGAAGAAGAAGAAGAAGAAGAA	GTTCTTAGAAGTTTAGGAGTGTTGGATTGGCCTAGTGAGCGAAAATAAAC	VKRKNILKFVSLLGIGSFVMLAAASCTSATTPTPNPTPTPTPTPTPTPTPNPEPNPMPNPGGGVGMSDGNTNPGNGGGMMGDNPNPGNTTPKQQLAAARKTLTDLLGTENTNVALYADYAKIQSTLSTAYMTAKTASENTSATLDNLRSASTTLQAAIDKAASAKNDFDSKNQPLVTAYNNLKTTLQSKTTSLEGLSENKYSSIKNHLSKLFDTGSAITAKTLDPTSGERPNLKKVNEANNSIKMDISPESLKNWKDNADKFNDFEKKPLSKTQLSTGTDSAHNQEQPANWSFAAYSVDLTSNSQNLPNWNFAQRKVWTSEGQEGGRTVLVSSPVSSTDVSWIYSLAGEGTKYTLSFEYYGPDTAFLYFPYKLVKQADSNSVALQYSLNKASPKLINFQ…
Rlow	284290	286423	+	26	9	GTAAATTATTTCTGAATTAACTGTAAAAACGAATGAAAGCTTTTGTTTTC	GAAGAAGAAGAAGAAGAAGAAGAAGAA	GTTCTTAGAAGTTTAGGAGTGTTGGATTGGCCTAGTGAGCGAAAATAAAC	VKRKNILKFVSLLGIGSFVMLAAASCTSATTPTPNPTPTPTPTPTPTPTPTPNPEPNPMPNPGGGVGMSDGNTNPGNGGGMMGDNPNPGNTTPKQQLAAARKTLTDLLGTENTNVALYADYAKIQSTLSTAYMTAKTASENTSATLDNLRSASTTLQAAIDKAASAKNDFDSKNQPLVTAYNNLKTTLQSKTTSLEGLSENKYSSIKNHLSKLFDTGSAITAKTLDPTSGERPNLKKVNEANNSIKMDISPESLKNWKDNADKFNDFEKKPLSKTQLSTGTDSAHNQEQPANWSFAAYSVDLTSNSQNLPNWNFAQRKVWTSEGQEGGRTVLVSSPVSSTDVSWIYSLAGEGTKYTLSFEYYGPDTAFLYFPYKLVKQADSNSVALQYSLNKASPKLIN…
VA94	271916	273998	+	26	10	AAAACATTTCTCTGAATTTGTTATAAAAATTATTAAAACTTTTTATTTTC	GAAGAAGAAGAAGAAGAAGAAGAAGAAGAA	GTTCTTAGGAGTTCTGGGGTTTGGGAATCCTGTGATCTGCGAAAATTAAG	VKRKNILKFVSLLGIGSFVMLAAASCTSATTPTPNPEPKPDPMPNPPSGGMNGGNTNPGNGGGMMGDNPNPGNTTPKQQLAAARKTLTDLLGTENTNVALYADYAKIQSTLSTAYMTAKTASENTSATLDNLRSASTTLQAAIDKAASDKRAFDSANQSLVAAYNNLKTTLQSKTNSLEGLSENKYSGIKNHLSKLFDAGSAITARTLDPTSGERPTLEKVNEANNGIKMAISSESLNKWKTNADKFNDFEKNPLSKEKLESTNDTAHNQEQPANWSFAAYSVDLTSNSQNLPNWNFAQRKVWTSEGQEGGRTVLVSSPVSSTDVSWIYSLAGEGTKYTLSFEYYGPDTAFLYFPYKLVKQADSNSVALQYSLNKASPKLINFQPVRTEPANADSTTNE…
W101	255829	257911	+	26	7	AAAACATTTCTCTGAATTTGTTATAAAAATTATTAAAACTTTTTATTTTC	GAAGAAGAAGAAGAAGAAGAA	GTTCTTAGGAGTTCTGGGGTTTGGGAATCCTGTGATCTGCGAAAATTAAG	VKRKNILKFVSLLGIGSFVMLAAASCTSATTPTPNPEPKPDPMPNPPSGGMNGGNTNPGNGGGMMGDNPNPGNTTPKQQLAAARKTLTDLLGTENTNVALYADYAKIQSTLSTAYMTAKTASENTSATLDNLRSASTTLQAAIDKAASDKRAFDSANQSLVAAYNNLKTTLQSKTNSLEGLSENKYSGIKNHLSKLFDAGSAITARTLDPTSGERPTLEKVNEANNGIKMAISSESLNKWKTNADKFNDFEKNPLSKEKLESTNDTAHNQEQPANWSFAAYSVDLTSNSQNLPNWNFAQRKVWTSEGQEGGRTVLVSSPVSSTDVSWIYSLAGEGTKYTLSFEYYGPDTAFLYFPYKLVKQADSNSVALQYSLNKASPKLINFQPVRTEPANADSTTNE…
CA06	258210	260280	+	27	9	TAAATTATTTTTGAATTAACTGTAAAAATGAATGAAACCTTTTGTTTTCC	GAAGAAGAAGAAGAAGAAGAAGAAGAA	GTTCTTAGGAGTTCTGGGGTTTGGGGCTGGTTTGATCAGTGAAAATTAAG	VKRKNILKFVSLLGIGSFVMLAAASCTTAATPTPNPEEPKPTNPEVPKPTNPTQPDKPEDDAAKKLAEAKTKLTSLLNTKTQNVAKYQDYAKIQSSLTTAYTTAEGVSHKNDANLMNIQAATTTLQNAIDKAASDKKTFDDENSDLVSAYSNLKTTLDTQTKTLEGLAGQQFSSINSHLTALYQAGQEIATKTLTPADGGTIDLEAVKNADKNIKTNISTESLTKWKDNANTFFNGFEKNVLSKAKLTLASNQSNSNDQPVNYSFVGYSGSVPFTGEANKPIWYFSQRKVWDYTSNNNGTIVQNASDNSTDSLTDVSWIYSLTGEGTKYQLTFDYYGPTTAYLYFPYKLVKTGDSSSVALQYKLNGGDNQQVEFKAETTPDSATGTKSTTAPNSGSASS…
MC06	258651	260721	+	27	9	TAAATTATTTTTGAATTAACTGTAAAAATGAATGAAACCTTTTGTTTTCC	GAAGAAGAAGAAGAAGAAGAAGAAGAA	GTTCTTAGGAGTTATGGGGTTTGGGGCTGGTTTGATCAGTGAAAATTAAG	VKRKNILKFVSLLGIGSFVMLAAASCTTAATPTPNPEEPKPTNPEVPKPTNPTQPDKPEDDAAKKLAEAKTKLTSLLNTKTQNVAKYQDYAKIQSSLTTAYTTAEGVSHKNDANLMNIQAATTTLQNAIDKAASDKKTFDDENSDLVSAYSNLKTTLDTQTKTLEGLAGQQFSSINSHLTALYQAGQEIATKTLTPADGGTIDLEAVKNADKNIKTNISTESLTKWKDNANTFFNGFEKNVLSKAKLTLASNQSNSNDQPVNYSFVGYSGSVPFTGEANKPIWYFSQRKVWDYTSNNNGTIVQNASDNSTDSLTDVSWIYSLTGEGTKYQLTFDYYGPTTAYLYFPYKLVKTGDSSSVALQYKLNGGDNQQVEFKAETTPDSATGTKSTTAPNSGSASS…
NC08	258649	260719	+	27	8	TAAATTATTTTTGAATTAACTGTAAAAATGAATGAAACCTTTTGTTTTCT	GAAGAAGAAGAAGAAGAAGAAGAA	GTTCTTAGGAGTTCTGGGGTTTGGGGCTGGTTTGATCAGTGAAAATTAAG	VKRKNILKFVSLLGIGSFVMLAAASCTTAATPTPNPEEPKPTNPEVPKPTNPTQPDKPEDDAAKKLAEAKTKLTSLLNTKTQNVAKYQDYAKIQSSLTTAYTTAEGVSHKNDANLMNIQAATTTLQNAIDKAASDKKTFDDENSDLVSAYSNLKTTLDTQTKTLEGLAGQQFSSINSHLTALYQAGQEIATKTLTPADGGTIDLEAVKNADKNIKTNISTESLTKWKDNANTFFNGFEKNVLSKAKLTLASNQSNSNDQPVNYSFVGYSGSVPFTGEANKPIWYFSQRKVWDYTSNNNGTIVQNASDNSTDSLTDVSWIYSLTGEGTKYQLTFDYYGPTTAYLYFPYKLVKTGDSSSVALQYKLNGGDNQQVEFKAETTPDSATGTKSTTAPNSGSASS…
NC95	263632	265702	+	27	8	TAAATTATTTTTGAATTAACTGTAAAAATGAATGAAACCTTTTGTTTTCC	GAAGAAGAAGAAGAAGAAGAAGAA	GTTCTTAGGAGTTCTGGGGTTTGGGGCTGGTTTGATCAGTGAAAATTAAG	VKRKNILKFVSLLGIGSFVMLAAASCTTAATPTPNPEEPKPTNPEVPKPTNPTQPDKPEDDAAKKLAEAKTKLTSLLNTKTQNVAKYQDYAKIQSSLTTAYTTAEGVSHKNDANLMNIQAATTTLQNAIDKAASDKKTFDDENSDLVSAYSNLKTTLDTQTKTLEGLASQQFSSINSHLTALYQAGQEIATKTLTPADGGTIDLEAVKNADKNIKTNISTESLTKWKDNANTFFNGFEKNVLSKAKLTLASNQSNSNDQPVNYSFVGYSGSVPFTGEANKPIWYFSQRKVWDYTSNNNGTIVQNASDNSTDSLTDVSWIYSLTGEGTKYQLTFDYYGPTTAYLYFPYKLVKTGDSSSVALQYKLNGGDNQQVEFKAETTPDSATGTKSTTAPNSGSASS…
NC96	263622	265692	+	27	13	TAAATTATTTTTGAATTAACTGTAAAAATGAATGAAACCTTTTGTTTTCC	GAAGAAGAAGAAGAAGAAGAAGAAGAAGAAGAAGAAGAA	GTTCTTAGGAGTTCTGGGGTTTGGGGCTGGTTTGATCAGTGAAAATTAAG	VKRKNILKFVSLLGIGSFVMLAAASCTTAATPTPNPEEPKPTNPEVPKPTNPTQPDKPEDDAAKKLAEAKTKLTSLLNTKTQNVAKYQDYAKIQSSLTTAYTTAEGVSHKNDANLMNIQAATTTLQNAIDKAASDKKTFDDENSDLVSAYSNLKTTLDTQTKTLEGLAGQQFSSINSHLTALYQAGQEIATKTLTPADGGTIDLEAVKNADKNIKTNISTESLTKWKDNANTFFNGFEKNVLSKAKLTLASNQSNSNDQPVNYSFVGYSGSVPFTGEANKPIWYFSQRKVWDYTSNNNGTIVQNASDNSTDSLTDVSWIYSLTGEGTKYQLTFDYYGPTTAYLYFPYKLVKTGDSSSVALQYKLNGGDNQQVEFKAETTPDSATGTKSTTAPNSGSASS…
NY01	263592	265662	+	27	12	TAAATTATTTTTGAATTAACTGTAAAAATGAATGAAACCTTTTGTTTTCC	GAAGAAGAAGAAGAAGAAGAAGAAGAAGAAGAAGAA	GTTCTTAGGAGTTCTGGGGTTTGGGGCTGGTTTGATCAGTGAAAATTAAG	VKRKNILKFVSLLGIGSFVMLAAASCTTAATPTPNPEEPKPTNPEVPKPTNPTQPDKPEDDAAKKLAEAKTKLTSLLNTKTQNVAKYQDYAKIQSSLTTAYTTAEGVSHKNDANLMNIQAATTTLQNAIDKAASDKKTFDDENSDLVSAYSNLKTTLDTQTKTLEGLAGQQFSSINSHLTALYQAGQEIATKTLTPADGGTIDLEAVKNADKNIKTNISTESLTKWKDNANTFFNGFEKNVLSKAKLTLASNQSNSNDQPVNYSFVGYSGSVPFTGEANKPIWYFSQRKVWDYTSNNNGTIVQNASDNSTDSLTDVSWIYSLTGEGTKYQLTFDYYGPTTAYLYFPYKLVKTGDSSSVALQYKLNGGDNQQVEFKAETTPDSATGTKSTTAPNSGSASS…
Rhigh	499922	502058	+	27	9	ATAATTTGTGATGGTTTTAACTATAAAAACTCACAAAACCTTTTGTTTTC	GAAGAAGAAGAAGAAGAAGAAGAAGAA	GTTCTTAGAAGTTTAGGGGTATGGGTTTGGGCAAGTGAGCGAAAATAAAC	VKRKNILKFVSLLGIGSFVMLAAASCTTPVNPTPNPKPKPDPMPNPPSGGMNGGNTPTPNPNPHSGGMNGGDTNPGNGGGMDNSAQQLAAAKVSLNTELATQTNNVALYSDYAKIKQDLTNAYTIANDVSTKSDATLMEVKKATTDLQGAIKAAAKAKTDFDSTHAELVTEYKNLKSTLQTKTQILDSLTAEQFSSISAHLSALYKAGEAITTKTLTPADGTMLNLTDVTGADNSIKAATSSDKLTKWKDNANTFFNGFEKNVLSKAKLTLASNQSNNNDQPVNYSYVGYSSSVPFTGEKNRPIWYFSQRKVWDYTSNNNGTIVQNASDNSTDSLTDVSWIYSLTGEGTKYQLTFDYYGPTTAYLYFPYKLVKTGDSSSVALQYKLNGGDNQQVEFKSE…
Rlow	500056	502192	+	27	15	ATAATTTGTGATGGTTTTAACTATAAAAACTCACAAAACCTTTTGTTTTC	GAAGAAGAAGAAGAAGAAGAAGAAGAAGAAGAAGAAGAAGAAGAA	GTTCTTAGAAGTTTAGGGGTATGGGTTTGGGCAAGTGAGCGAAAATAAAC	VKRKNILKFVSLLGIGSFVMLAAASCTTPVNPTPNPKPKPDPMPNPPSGGMNGGNTPTPNPNPHSGGMNGGDTNPGNGGGMDNSAQQLAAAKVSLNTELATQTNNVALYSDYAKIKQDLTNAYTIANDVSTKSDATLMEVKKATTDLQGAIKAAAKAKTDFDSTHAELVTEYKNLKSTLQTKTQILDSLTAEQFSSISAHLSALYKAGEAITTKTLTPADGTMLNLTDVTGADNSIKAATSSDKLTKWKDNANTFFNGFEKNVLSKAKLTLASNQSNNNDQPVNYSYVGYSSSVPFTGEKNRPIWYFSQRKVWDYTSNNNGTIVQNASDNSTDSLTDVSWIYSLTGEGTKYQLTFDYYGPTTAYLYFPYKLVKTGDSSSVALQYKLNGGDNQQVEFKSE…
VA94	274343	276413	+	27	16	TAAATTATTTTTGAATTAACTGTAAAAATGAATGAAACCTTTTGTTTTCC	GAAGAAGAAGAAGAAGAAGAAGAAGAAGAAGAAGAAGAAGAAGAAGAA	GTTCTTAGGAGTTCTGGGGTTTGGGGCTGGTTTGATCAGTGAAAATTAAG	VKRKNILKFVSLLGIGSFVMLAAASCTTAATPTPNPEEPKPTNPEVPKPTNPTQPDKPEDDAAKKLAEAKTKLTSLLNTKTQNVAKYQDYAKIQSSLTTAYTTAEGVSHKNDANLMNIQAATTTLQNAIDKAASDKKTFDDENSDLVSAYSNLKTTLDTQTKTLEGLAGQQFSSINSHLTALYQAGQEIATKTLTPADGGTIDLEAVKNADKNIKTNISTESLTKWKDNANTFFNGFEKNVLSKAKLTLASNQSNSNDQPVNYSFVGYSGSVPFTGEANKPIWYFSQRKVWDYTSNNNGTIVQNASDNSTDSLTDVSWIYSLTGEGTKYQLTFDYYGPTTAYLYFPYKLVKTGDSSSVALQYKLNGGDNQQVEFKAETTPDSATGTKSTTAPNSGSASS…
W101	258232	260302	+	27	8	TAAATTATTTTTGAATTAACTGTAAAAATGAATGAAACCTTTTGTTTTCC	GAAGAAGAAGAAGAAGAAGAAGAA	GTTCTTAGGAGTTCTGGGGTTTGGGGCTGGTTTGATCAGTGAAAATTAAG	VKRKNILKFVSLLGIGSFVMLAAASCTTAATPTPNPEEPKPTNPEVPKPTNPTQPDKPEDDAAKKLAEAKTKLTSLLNTKTQNVAKYQDYAKIQSSLTTAYTTAEGVSHKNDANLMNIQAATTTLQNAIDKAASDKKTFDDENSDLVSAYSNLKTTLDTQTKTLEGLAGQQFSSINSHLTALYQAGQEIATKTLTPADGGTIDLEAVKNADKNIKTNISTESLTKWKDNANTFFNGFEKNVLSKAKLTLASNQSNSNDQPVNYSFVGYSGSVPFTGEANKPIWYFSQRKVWDYTSNNNGTIVQNASDNSTDSLTDVSWIYSLTGEGTKYQLTFDYYGPTTAYLYFPYKLVKTGDSSSVALQYKLNGGDNQQVEFKAETTPDSATGTKSTTAPNSGSASS…
CA06	563633	565730	-	29	8	AATCGTAGTTGTGATTGAAGTATAAATATCAACAAAACCCTTTGTTTCTG	GAAGAAGAAGAAGAAGAAGAAGAA	GTTCTTAGGAGTTCTGGGGTTTTCGTTTGGTCTGATCGGCGAAAATAAAC	VKRKNILKFVSLLGIGSFVMLAAASCTTATTPTPNPEPKPTPNPEPKPDPMPNPPSGGMNGGNTNPGGGQGMMDSVAQELTDAKKVLSDLIGEESKTVELYADYAKIKADLTSAYTVAKTTSDSSTSTLDQVKTATSKLQTAIDKAVSDKRAFDSANQPLVTAYNNLKTTLQSKTNSLEGLSENKYSSIKNHLSELFDAGSAITARTLDPTMGTVPEVLSVTKANEDITTAVSKLREWKTNADKFNNFEKKSLLRANFFSENSQTQPGNWSFVGYSNNLNTGSSNQTNLSNWNFAKRQVWLARADGSTDLVQNPTESTDVAWIYNLAGEGAKYTLHFTYYGPSTANLYFPYKLVNENDNVGLQYILNENSPKEINFRPTTRATENVSSNDAQTESVGNA…
NC08	534685	536782	-	29	14	AATCGTAGTTGTGATTGAAGTATAAATATCAACAAAACCCTTTGTTTCTG	GAAGAAGAAGAAGAAGAAGAAGAAGAAGAAGAAGAAGAAGAA	GTTCTTAGGAGTTCTGGGGTTTTCGTTTGGTCTGATCGGCGAAAATAAAC	VKRKNILKFVSLLGIGSFVMLAAASCTTATTPTPNPEPKPTPNPEPKPDPMPNPPSGGMNGGNTNPGGGQGMMDSVAQELTDAKKVLSDLIGEESKTVELYADYAKIKADLTSAYTVAKTTSDSSTSTLDQVKTATSKLQTAIDKAVSDKRAFDSANQPLVTAYNNLKTTLQSKTNSLEGLSENKYSSIKNHLSELFDAGSAITARTLDPTMGTVPEVLSVTKANEDITTAVSKLREWKTNADKFNNFEKKSLLRANFFSENSQTQPGNWSFVGYSNNLNTGSSNQTNLSNWNFAKRQVWLARADGSTDLVQNPTESTDVAWIYNLAGEGAKYTLHFTYYGPSTANLYFPYKLVNENDNVGLQYILNENSPKEINFRPTTRATENVSSNDAQTESVGNA…
NC95	539880	541977	-	29	5	AATCGTAGTTGTGATTGAAGTATAAATATCAACAAAACCCTTTGTTTCTG	GAAGAAGAAGAAGAA	GTTCTTAGGAGTTCTGGGGTTTTCGTTTGGTCTGATCGGCGAAAATAAAC	VKRKNILKFVSLLGIGSFVMLAAASCTTATTPTPNPEPKPTPNPEPKPDPMPNPPSGGMNGGNTNPGGGQGMMDSVAQELTDAKKVLSDLIGEESKTVELYADYAKIKADLTSAYTVAKTTSDSSTSTLDQVKTATSKLQTAIDKAVSDKRAFDSANQPLVTAYNNLKTTLQSKTNSLEGLSENKYSSIKNHLSELFDAGSAITARTLDPTMGTVPEVLSVTKANEDITTAVSKLREWKTNADKFNNFEKKSLLRANFFSENSQTQPGNWSFVGYSNNLNTGSSNQTNLSNWNFAKRQVWLARADGSTDLVQNPTESTDVAWIYNLAGEGAKYTLHFTYYGPSTANLYFPYKLVNENDNVGLQYILNENSPKEINFRPTTRATENVSSNDAQTESVGNA…
NC96	569068	571165	-	29	6	AATCGTAGTTGTGATTGAAGTATAAATATCAACAAAACCCTTTGTTTCTG	GAAGAAGAAGAAGAAGAA	GTTCTTAGGAGTTCTGGGGTTTTCGTTTGGTCTGATCGGCGAAAATAAAC	VKRKNILKFVSLLGIGSFVMLAAASCTTATTPTPNPEPKPTPNPEPKPDPMPNPPSGGMNGGNTNPGGGQGMMDSVAQELTDAKKVLSDLIGEESKTVELYADYAKIKADLTSAYTVAKTTSDSSTSTLDQVKTATSKLQTAIDKAVSDKRAFDSANQPLVTAYNNLKTTLQSKTNSLEGLSENKYSSIKNHLSELFDAGSAITARTLDPTMGTVPEVLSVTKANEDITTAVSKLREWKTNADKFNNFEKKSLLRANFFSENSQTQPGNWSFVGYSNNLNTGSSNQTNLSNWNFAKRQVWLARADGSTDLVQNFTESTDVAWIYNLAGEGAKYTLHFTYYGPSTANLYFPYKLVNENDNVGLQYILNENSPKEINFRPTTRATENVSSNDAQTESVGNA…
Rhigh	597294	599388	-	29	8	GAATTTAATTGTGGATTAACTAAAAAAAAATATAAAAACCTTTTGTTTTC	GAAGAAGAAGAAGAAGAAGAAGAA	GTTCTTAGGAGTTCTGGAGTTTTGGGCTGGTTTGATCGGCGAAAATTAAG	VKRKNILKFVSLLGIGSFVMLAAASCTSATTPTPNPEPKPNPEPKPDPMPNPGGGMNGGNTNRGNGGGMMGDNPNPGNTTPEQQLAAARKTLTDLLGTENTNVALYADYAKIQSTLSTAYMTAKTASENTSATLDNLRSASTTLQAAIDKAASDKRAFDSANQPLVAAYNNLKTTLQSKTTSLEGLSENKYSSIKNHVSELFDAGSAITTRTLDPTMGTVPEVLSVTKANEDITTAVSKLTEWKTNADKFNNFEKKSLLRANFSSENSQTQPGNWSFVGYSNNLNTGSSNQTNLANWNFAQRQVWSARADGSTDLVQNPTESTDVAWIYNLAGEGAKYTLHFTYYGPSTANLYFPYKLVNENDNVGLQYILNEESPKEINFRPTTRATENVSSNDARTE…
Rlow	597443	599537	-	29	10	GAATTTAATTGTGGATTAACTAAAAAAAAATATAAAAACCTTTTGTTTTC	GAAGAAGAAGAAGAAGAAGAAGAAGAAGAA	GTTCTTAGGAGTTCTGGAGTTTTGGGCTGGTTTGATCGGCGAAAATTAAG	VKRKNILKFVSLLGIGSFVMLAAASCTSATTPTPNPEPKPNPEPKPDPMPNPGGGMNGGNTNRGNGGGMMGDNPNPGNTTPEQQLAAARKTLTDLLGTENTNVALYADYAKIQSTLSTAYMTAKTASENTSATLDNLRSASTTLQAAIDKAASDKRAFDSANQPLVAAYNNLKTTLQSKTTSLEGLSENKYSSIKNHVSELFDAGSAITTRTLDPTMGTVPEVLSVTKANEDITTAVSKLTEWKTNADKFNNFEKKSLLRANFSSENSQTQPGNWSFVGYSNNLNTGSSNQTNLANWNFAQRQVWSARADGSTDLVQNPTESTDVAWIYNLAGEGAKYTLHFTYYGPSTANLYFPYKLVNENDNVGLQYILNEESPKEINFRPTTRATENVSSNDARTE…
VA94	550644	552741	-	29	7	AATCGTAGTTGTGATTGAAGTATAAATATCAACAAAACCCTTTGTTTCTG	GAAGAAGAAGAAGAAGAAGAA	GTTCTTAGGAGTTCTGGGGTTTTCGTTTGGTCTGATCGGCGAAAATAAAC	VKRKNILKFVSLLGIGSFVMLAAASCTTATTPTPNPEPKPTPNPEPKPDPMPNPPSGGMNGGNTNPGGGQGMMDSVAQELTDAKKVLSDLIGEESKTVELYADYAKIKADLTSAYTVAKTTSDSSTSTLDQVKTATSKLQTAIDKAVSDKRAFDSANQPLVTAYNNLKTTLQSKTNSLEGLSENKYSSIKNHLSELFDAGSAITARTLDPTMGTVPEVLSVTKANEDITTAVSKLREWKTNADKFNNFEKKSLLRANFFSENSQTQPGNWSFVGYSNNLNTGSSNQTNLSNWNFAKRQVWLARADGSTDLVQNPTESTDVAWIYNLAGEGAKYTLHFTYYGPSTANLYFPYKLVNENDNVGLQYILNENSPKEINFRPTTRATENVSSNDAQTESVGNA…
W101	531603	533700	-	29	4	AATCGTAGTTGTGATTGAAGTATAAATATCAACAAAACCCTTTGTTTCTG	GAAGAAGAAGAA	GTTCTTAGGAGTTTTGGGGTTTTCGTTTGGTCTGATCGGCGAAAATAAAC	VKRKNILKFVSLLGIGSFVMLAAASCTTATTPTPNPEPKPTPNPEPKPDPMPNPPSGGMNGGNTNPGGGQGMMDSVAQELTDAKKVLSDLIGEESKTVELYADYAKIKADLTSAYTVAKTTSDSSTSTLDQVKTATSKLQTAIDKAVSDKRAFDSANQPLVTAYNNLKTTLQSKTNSLEGLSENKYSSIKNHLSELFDAGSAITARTLDPTMGTVPEVLSVTKANEDITTAVSKLREWKTNADKFNNFEKKSLLRANFFSENSQTQPGNWSFVGYSNNLNTGSSNQTNLSNWNFAKRQVWLARADGSTDLVQNPTESTDVAWIYNLAGEGAKYTLHFTYYGPSTANLYFPYKLVNENDNVGLQYILNENSPKEINFRPTTRATENVSSNDAQTESVGNA…
CA06	797230	799332	-	30	4	TAAATTATTTCTGAATCAACTGTAAAAACGAATGAAACCCTTTGTTTTTC	GAAGAAGAAGAA	GTTCTTAGAAGTTCTGTGGTCTGGGGTTGGTTTGATCAGCGAAAATAAAC	VKRKNILKFVSLLGIGSFVMLAAASCTSATTPTPNPEPTPNPEPKPDPMPNPPSGGMNGGDTNPGNGGGMDNSAQQLAAAKTALTTLLNTKSEKVGLYSDYAKIKDDLVKAYTAAKEISDKSDATLQEVNNAKTTLETAITTAASSKTSFDEKNPELIKAYNALKETLKNEETVLSGLTDSNFATIKTNLTALYQSGKDIVTKTLDPLMGTAIDLSAVSQANTNISNATSKLQNWKTNANTLATSFVKEVLVKNKLTGIDTTNNREQPGNYSFVGYGVDVTTGSNNARPNWSFAQRKVWTSETARNNGSTDLVVNPTVPTDVSWIYSLTGQGAKYTLEFNYYGPSTGYLYFPYKLVKESDKNMAALQYSLNGATTPTAVEFKAATETQPAAAGQQSSTG…
MC06	541993	544096	-	30	9	TAAATTATTTCTGAATCAACTGTAAAAACGAATGAAACCCTTTGTTTTTC	GAAGAAGAAGAAGAAGAAGAAGAAGAA	GTTCTTAGAAGTTCTGTGGTCTGGGGTTGGTTTGATCAGCGAAAATAAAC	VKRKNILKFVSLLGIGSFVMLAAASCTSATTPTPNPEPTPNPEPKPDPMPNPPSGGMNGGDTNPGNGGGMDNSAQQLAAAKTALTTLLNTKSEKVGLYSDYAKIKDDLVKAYTAAKEISDKSDATLQEVNNAKTTLETAITTAASSKTSFDEKNPELIKAYNALKETLKNEETVLSGLTDSNFATIKTNLTALYQSGKDIVTKTLDPLMGTAIDLSAVSQANTNISNATSKLQNWKTNANTLATSFVKEVLVKNKLTGIDTTNNREQPGNYSFVGYGVDVTTGSNNARPNWSFAQRKVWTSETARNNGSTDLVVNPTVPTDVSWIYSLTGQGAKYTLEFNYYGPSTGYLYFPYKLVKESDKNMAALQYSLNGATTPTAVEFKAATETQPAAAGQQFSTG…
MC06	773065	775168	-	30	8	TAAATTATTTCTGAATCAACTGTAAAAACGAATGAAACCCTTTGTTTTTC	GAAGAAGAAGAAGAAGAAGAAGAA	GTTCTTAGAAGTTCTTAGAAGTTCTGTGGTCTGGGGTTGGTTTGATCAGC	VKRKNILKFVSLLGIGSFVMLAAASCTSATTPTPNPEPTPNPEPKPDPMPNPPSGGMNGGDTNPGNGGGMDNSAQQLAAAKTALTTLLNTKSEKVGLYSDYAKIKDDLVKAYTAAKEISDKSDATLQEVNNAKTTLETAITTAASSKTSFDEKNPELIKAYNALKETLKNEETVLSGLTDSNFATIKTNLTALYQSGKDIVTKTLDPLMGTAIDLSAVSQANTNISNATSKLQNWKTNANTLATSFVKEVLVKNKLTGIDTTNNREQPGNYSFVGYGVDVTTGSNNARPNWSFAQRKVWTSETARNNGSTDLVVNPTVPTDVSWIYSLTGQGAKYTLEFNYYGPSTGYLYFPYKLVKESDKNMAALQYSLNGATTPTAVEFKAATETQPAAAGQQSSTG…
NC95	773706	775809	-	30	5	TAAATTATTTCTGAATCAACTGTAAAAACGAATGAAACCCTTTGTTTTTC	GAAGAAGAAGAAGAA	GTTCTTAGAAGTTCTGTGGTCTGGGGTTGGTTTGATCAGCGAAAATAAAC	VKRKNILKFVSLLGIGSFVMLAAASCTSATTPTPNPEPTPNPEPKPDPMPNPPSGGMNGGDTNPGNGGGMDNSAQQLAAAKTALTTLLNTKSEKVGLYSDYAKIKDDLVKAYTAAKEISDKSDATLQEVNNAKTTLETAITTAASSKTSFDEKNPELIKAYNALKETLKNEETVLSGLTDSNFATIKTNLTALYQSGKDIVTKTLDPLMGTAIDLSAVSQANTNISNATSKLQNWKTNANTLATSFVKEVLVKNKLTGIDTTNNREQPGNYSFVGYGVDVTTGSNNARPNWSFAQRKVWTSETARNNGSTDLVVNPTVPTDVSWIYSLTGQGAKYTLEFNYYGPSTGYLYFPYKLVKESDKNMAALQYSLNGATTPTAVEFKAATETQPAAAGQQSSTG…
NC96	806556	808659	-	30	9	TAAATTATTTCTGAATCAACTGTAAAAACGAATGAAACCCTTTGTTTTTC	GAAGAAGAAGAAGAAGAAGAAGAAGAA	GTTCTTAGAAGTTCTGTGGTCTGGGGTTGGTTTGATCAGCGAAAATAAAC	VKRKNILKFVSLLGIGSFVMLAAASCTSATTPTPNPEPTPNPEPKPDPMPNPPSGGMNGGDTNPGNGGGMDNSAQQLAAAKTALTTLLNTKSEKVGLYSDYAKIKDDLVKAYTAAKEISDKSDATLQEVNNAKTTLETAITTAASSKTSFDEKNPELIKAYNALKETLKNEETVLSGLTDSNFATIKTNLTALYQSGKDIVTKTLDPLMGTAIDLSAVSQANTNISNATSKLQNWKTNANTLATSFVKEVLVKNKLTGIDTTNNREQPGNYSFVGYGVDVTTGSNNARPNWSFAQRKVWTSETARNNGSTDLVVNPTVPTDVSWIYSLTGQGAKYTLEFNYYGPSTGYLYFPYKLVKESDKNMAALQYSLNGATTPTAVEFKAATETQPAAAGQQSSTG…
NY01	785456	787559	-	30	5	TAAATTATTTCTGAATCAACTGTAAAAACGAATGAAACCCTTTGTTTTTC	GAAGAAGAAGAAGAA	GTTCTTAGAAGTTCTGTGGTCTGGGGTTGGTTTGATCAGCGAAAATAAAC	VKRKNILKFVSLLGIGSFVMLAAASCTSATTPTPNPEPTPNPEPKPDPMPNPPSGGMNGGDTNPGNGGGMDNSAQQLAAAKTALTTLLNTKSEKVGLYSDYAKIKDDLVKAYTAAKEISDKSDATLQEVNNAKTTLETAITTAASSKTSFDEKNPELIKAYNALKETLKNEETVLSGLTDSNFATIKTNLTALYQSGKDIVTKTLDPLMGTAIDLSAVSQANTNISNATSKLQNWKTNANTLATSFVKEVLVKNKLTGIDTTNNREQPGNYSFVGYGVDVTTGSNNARPNWSFAQRKVWTSETARNNGSTDLVVNPTVPTDVSWIYSLTGQGAKYTLEFNYYGPSTGYLYFPYKLVKESDKNMAALQYSLNGATTPTAVEFKAATETQPAAAGQQSSTG…
S6	455211	457326	+	30	17	TAAAGATGTGCGGTTTTAACTATAAAAACTAATAAAACTCTTTGTTTTTA	GAAGAAGAAGAAGAAGAAGAAGAAGAAGAAGAAGAAGAAGAAGAAGAAGAA	GTTCTTAGGAGTTCTGGGGTCTGGGGATCGTTTGATCAGCGAAAATAAAC	VKRKNILKFVSLLGIGSFVMLAAASCTTPVNPTPNPTPTPNPEPNPGGGGGMSDGNTNPGNGGGMMGDNPNPGNTTPEQQLAAARKTLTDLLGTENTNVALYADYANIQSNLSTAYMTAKTASENTNATLDNLRSASTTLQAAIDKAASDKRAFDSANQSLLAAYNNLKTTLQSKTTSLEGLSENKYSSIKNHLSKLFDAGSAITAKTLDPTMGTVPKVQSVTKANEDITTAVSKLTEWKTNADKFNDFEKKSLSKEKLESTNDTAHNQEQPANWSFVGYSVDITTGSASNSQNPPNWNFAQRKVWTSETTRNNGSTDLVSNPTVPTDVSWIYSLTGQGAKYTLEFTYYGPSRAFLYFPYKLVKASDEVELQYKLNDADPKAIEFKKSSATQAPASESE…
VA94	784431	786516	-	30	9	TAAATTATTTCTGAATCAACTGTAAAAACGAATGAAACCCTTTGTTTTTC	GAAGAAGAAGAAGAAGAAGAAGAAGAA	GTTCTTAGAAGTTCTGTGGTCTGGGGTTGGTTTGATCAGCGAAAATAAAC	VKRKNILKFVSLLGIGSFVMLAAASCTSATTPTPNPEPKPDPMPNPPSGGMNGGDTNPGNGGGMDNSAQQLAAAKTALTTLLNTKSEKVGLYSDYAKIKDDLVKAYTAAKEISDKSDATLQEVNNAKTTLETAITTAASSKTSFDEKNPELIKAYNALKETLKNEETVLSGLTDSNFATIKTNLTALYQSGKDIVTKTLDPLMGTAIDLSAVSQANTNISNATSKLQNWKTNANTLATSFVKEVLVKNKLTGIDTTNNREQPGNYSFVGYGVDVTTGSNNARPNWSFAQRKVWTSETARNNGSTDLVVNPTVPTDVSWIYSLTGQGAKYTLEFNYYGPSTGYLYFPYKLVKESDKNMAALQYSLNGATTPTAVEFKAATETQPAAAGQQSSTGSRGEQP…
W101	760339	762443	-	30	10	TAAATTATTTCTGAATCAACTGTAAAAACGAATGAAACCCTTTGTTTTTC	GAAGAAGAAGAAGAAGAAGAAGAAGAAGAA	GTTCTTAGAAGTTCTGTGGTCTGGGGTTGGTTTGATCAGCGAAAATAAAC	VKRKNILKFVSLLGIGSFVMLAAASCTSATTPTPNPEPTPNPEPKPDPMPNPPSGGMNGGDTNPGNGGGMDNSAQQLAAAKTALTTLLNTKSEKVGLYSDYAKIKDDLVKAYTAAKEISDKSDATLQEVNNAKTTLETAITTAASSKTSFDEKNPELIKAYNALKETLKNEETVLSGLTDSNFATIKTNLTALYQSGKDIVTKTLDPLMGTAIDLSAVSQANTNISNATSKLQNWKTNANTLATSFVKEVLVKNKLTGIDTTNNREQPGNYSFVGYGVDVTTGSNNARPNWSFAQRKVWTSETARNNGSTDLVVNPTVPTDVSWIYSLTGQGAKYTLEFNYYGPSTGYLYFPYKLVKESDKNMAALQYSLNGATTPTAVEFKAATETQPAAAGQQSSTG…
Rhigh	606885	609072	-	31	6	AAAACATTTCTCTGAATTTGTTATAAAAATTAGTGAAACCTTTGATTTTC	GAAGAAGAAGAAGAAGAA	GTTCTTAGGAGTTCTGGGGTTTGGGAATCCTGTGATCAGCGAAAATTAAG	VKRKNILKFVSLLGIGSFVMLAAASCTTPVNPTPNPTPNPQPKPDPMPNPDGGMMGGNTNPGNGGGTDNAAQQLADAKAALTTLLNTESEKVGLYSDYANIQDTLVKAYTAAKEISDKSDATLQEVNNAKTKLETAITNAANSKTSFDEKNPELIKAYYALKETLKNEKSNLDSVMAAEFAAIKNNLDSLYQTAKTLVEGTLQPKMGNSPQVEVVNQANTNISNAVSKLETWKANANTLATGFVKEVLVKNKLTGIDTTNNQEQPGNYSFVGYSVDVTTGSNNARPNWSFAKRIVWTNTGGNNLPLDNESQNSVPLTDVSWIYSLSGTNAKYTLTFDYYGASSNGYLYFPYKLVKKEDKVALQYSLNGTAPKAIEFKPAATKEITTTQSGSSDASSASS…
Rlow	607028	609215	-	31	10	AAAACATTTCTCTGAATTTGTTATAAAAATTAGTGAAACCTTTGATTTTC	GAAGAAGAAGAAGAAGAAGAAGAAGAAGAA	GTTCTTAGGAGTTCTGGGGTTTGGGAATCCTGTGATCAGCGAAAATTAAG	VKRKNILKFVSLLGIGSFVMLAAASCTTPVNPTPNPTPNPQPKPDPMPNPDGGMMGGNTNPGNGGGTDNAAQQLADAKAALTTLLNTESEKVGLYSDYANIQDTLVKAYTAAKEISDKSDATLQEVNNAKTKLETAITNAANSKTSFDEKNPELIKAYYALKETLKNEKSNLDSVMAAEFAAIKNNLDSLYQTAKTLVEGTLQPKMGNSPQVEVVNQANTNISNAVSKLETWKANANTLATGFVKEVLVKNKLTGIDTTNNQEQPGNYSFVGYSVDVTTGSNNARPNWSFAKRIVWTNTGGNNLPLDNESQNSVPLTDVSWIYSLSGTNAKYTLTFDYYGASSNGYLYFPYKLVKKEDKVALQYSLNGTAPKAIEFKPAATKEITTTQSGSSDASSASS…
Rhigh	265343	267347	+	32	14	TAATCTAGTTATGGTTTAAGATATAAAAACTTATAAAACCTTTTATTTTC	GAAGAAGAAGAAGAAGAAGAAGAAGAAGAAGAAGAAGAAGAA	GATCTTAGAAGTTCTTAAGTTTGGGTCTCGTCTGATCGGTGAAAATTAAG	VKRKNILKFVSLLGIGSFVMLAAASCTSATTPTPNPTPKPDPMPNPGGGMNGGNTNRGNGGGMMGDNPNPGNTTPEQQLAAARKTLTDLLGTENTNVAFYADYAKIQSTLNAAYMTAKTASENTSASLENLRSASTTLQAAIDKAASDKRAFDSANQSLVTAYNNLKTTLQFKTTSLEELSENKYSGIKNHLSKLFDTGSAITAKTLDPTSGERPTLEKVNEANNSIKMAISPESLKKWKDNADKFNEFEKNPLSKEKLSTGTDSAHNQEQPANYSFVGYSVDVTGTTTAPASEKALLNWNYAQRTIFTSGDQPTKIDTPAASDEAPAQPLSNVSWIYSLAGNGAKYTLDFTYYGPSTGYLYFPYKLVKNSDSVGLQYKLNNSPTETAIAFGNMQNANG…
Rhigh	279528	281532	+	32	15	TAATCTAGTTATGGTTTAAGATATAAAAACTTATAAAACCTTTTATTTTC	GAAGAAGAAGAAGAAGAAGAAGAAGAAGAAGAAGAAGAAGAAGAA	GATCTTAGAAGTTCTTAAGTTTGGGTCTCGTCTGATCGGTGAAAATTAAG	VKRKNILKFVSLLGIGSFVMLAAASCTSATTPTPNPTPKPDPMPNPGGGMNGGNTNRGNGGGMMGDNPNPGNTTPEQQLAAARKTLTDLLGTENTNVAFYADYAKIQSTLNAAYMTAKTASENTSASLENLRSASTTLQAAIDKAASDKRAFDSANQSLVTAYNNLKTTLQFKTTSLEELSENKYSGIKNHLSKLFDTGSAITAKTLDPTSGERPTLEKVNEANNSIKMAISPESLKKWKDNADKFNEFEKNPLSKEKLSTGTDSAHNQEQPANYSFVGYSVDVTGTTTAPASEKALLNWNYAQRTIFTSGDQPTKIDTPAASDEAPAQPLSNVSWIYSLAGNGAKYTLDFTYYGPSTGYLYFPYKLVKNSDSVGLQYKLNNSPTETAIAFGNMQNANG…
Rlow	265429	267433	+	32	15	TAATCTAGTTATGGTTTAAGATATAAAAACTTATAAAACCTTTTATTTTC	GAAGAAGAAGAAGAAGAAGAAGAAGAAGAAGAAGAAGAAGAAGAA	GATCTTAGAAGTTCTTAAGTTTGGGTCTCGTCTGATCGGTGAAAATTAAG	VKRKNILKFVSLLGIGSFVMLAAASCTSATTPTPNPTPKPDPMPNPGGGMNGGNTNRGNGGGMMGDNPNPGNTTPEQQLAAARKTLTDLLGTENTNVAFYADYAKIQSTLNAAYMTAKTASENTSASLENLRSASTTLQAAIDKAASDKRAFDSANQSLVTAYNNLKTTLQFKTTSLEELSENKYSGIKNHLSKLFDTGSAITAKTLDPTSGERPTLEKVNEANNSIKMAISPESLKKWKDNADKFNEFEKNPLSKEKLSTGTDSAHNQEQPANYSFVGYSVDVTGTTTAPASEKALLNWNYAQRTIFTSGDQPTKIDTPAASDEAPAQPLSNVSWIYSLAGNGAKYTLDFTYYGPSTGYLYFPYKLVKNSDSVGLQYKLNNSPTETAIAFGNMQNANG…
Rlow	279602	281606	+	32	10	TAATCTAGTTATGGTTTAAGATATAAAAACTTATAAAACCTTTTATTTTC	GAAGAAGAAGAAGAAGAAGAAGAAGAAGAA	GATCTTAGAAGTTCTTAAGTTTGGGTCTCGTCTGATCGGTGAAAATTAAG	VKRKNILKFVSLLGIGSFVMLAAASCTSATTPTPNPTPKPDPMPNPGGGMNGGNTNRGNGGGMMGDNPNPGNTTPEQQLAAARKTLTDLLGTENTNVAFYADYAKIQSTLNAAYMTAKTASENTSASLENLRSASTTLQAAIDKAASDKRAFDSANQSLVTAYNNLKTTLQFKTTSLEELSENKYSGIKNHLSKLFDTGSAITAKTLDPTSGERPTLEKVNEANNSIKMAISPESLKKWKDNADKFNEFEKNPLSKEKLSTGTDSAHNQEQPANYSFVGYSVDVTGTTTAPASEKALLNWNYAQRTIFTSGDQPTKIDTPAASDEAPAQPLSNVSWIYSLAGNGAKYTLDFTYYGPSTGYLYFPYKLVKNSDSVGLQYKLNNSPTETAIAFGNMQNANG…
CA06	460842	463020	+	33	12	GTAAATTATTTCTGAATTAACTGTAAAAACGAATGAAAGCTTTTGTTTCC	GAAGAAGAAGAAGAAGAAGAAGAAGAAGAAGAAGAA	CTTAGAAGTTTAGAGGTTTGGGGCTCGTCTGATCGACGAAAATAAACACG	VKRKNILKFVSLLGIGSFVMLAAASCTSATTPTPNPEPKPDPMPNPPRGGMNDGDTNPANGGGMDNSAQQLAAAKTALTTLLNGQTEKVGLYNDYAKIKDDLVKAYTAAKEISDKSDANLQEVNNAKTRLETAITTAASSKTSFDEKNPELIKAYNALKETLKNEKSNLDSVMTAEFAAIKNNLDSLYQTAKTLVEGTLQPKMGNSPQVEVINQANTNISNAVSKLETWKANANTLATGFVKEVLVKNKLTGIDTTNNQEQPGNYSFVGYSVDVTTGSNNARPNWSFAKRIVWTNTGGNNLPLDNESQNSVPLTDVSWIYSLSGTNAKYTLTFDYYGASSNGYLYFPYKLVKKEDKVALQYSLNGTAPKAIEFKPAATKEITTTQSGSSDASSASSPGS…
NC96	466262	468440	+	33	12	GTAAATTATTTCTGAATTAACTGTAAAAACGAATGAAAGCTTTTGTTTCC	GAAGAAGAAGAAGAAGAAGAAGAAGAAGAAGAAGAA	CTTAGAAGTTTAGAGGTTTGGGGCTCGTCTGATCGACGAAAATAAACACG	VKRKNILKFVSLLGIGSFVMLAAASCTSATTPTPNPEPKPDPMPNPPRGGMNDGDTNPANGGGMDNSAQQLAAAKTALTTLLNGQTEKVGLYNDYAKIKDDLVKAYTAAKEISDKSDANLQEVNNAKTRLETAITTAASSKTSFDEKNPELIKAYNALKETLKNEKSNLDSVMTAEFAAIKNNLDSLYQTAKTLVEGTLQPKMGNSPQVEVINQANTNISNAVSKLETWKANANTLATGFVKEVLVKNKLTGIDTTNNQEQPGNYSFVGYSVDVTTGSNNARPNWSFAKRIVWTNTGGNNLPLDNESQNSVPLTDVSWIYSLSGTNAKYTLTFDYYGASSNGYLYFPYKLVKKEDKVALQYSLNGTAPKAIEFKPAATKEITTTQSGSSDASSASSPGS…
NY01	545118	547296	-	33	9	GTAAATTATTTCTGAATTAACTGTAAAAACGAATGAAAGCTTTTGTTTCC	GAAGAAGAAGAAGAAGAAGAAGAAGAA	CTTAGAAGTTTAGAGGTTTGGGGCTCGTCTGATCGACGAAAATAAACACG	VKRKNILKFVSLLGIGSFVMLAAASCTSATTPTPNPEPKPDPMPNPPRGGMNDGDTNPANGGGMDNSAQQLAAAKTALTTLLNGQTEKVGLYNDYAKIKDDLVKAYTAAKEISDKSDANLQEVNNAKTRLETAITTAASSKTSFDEKNPELIKAYNALKETLKNEKSNLDSVMTAEFAAIKNNLDSLYQTAKTLVEGTLQPKMGNSPQVEVINQANTNISNAVSKLETWKANANTLATGFVKEVLVKNKLTGIDTTNNQEQPGNYSFVGYSVDVTTGSNNARPNWSFAKRIVWTNTGGNNLPLDNESQNSVPLTDVSWIYSLSGTNAKYTLTFDYYGASSNGYLYFPYKLVKKEDKVALQYSLNGTAPKAIEFKPAATKEITTTQSGSSDASSASSPGS…
Rhigh	480559	482746	+	33	10	TAAAGATGTGCGGTTTTAACTATAAAAACTAATAAAACTCTTTGTTTTTA	GAAGAAGAAGAAGAAGAAGAAGAAGAAGAA	GTTCTTAGGAGTTCTGGGGTTTTCGTTTGGTCTGATCGGCGAAAATAAAC	VKKKNILKFVSLLGIGSFVMVAAASCTSATTPNPTPTPNPEPKPNPGGGGGMSGGNTNPSDGQGMMNAAAKELAAAKTALTTLLNGQTEKVGLYNDYAKIKDDLVKAYTAAKEISDKSDVTLQEVNNAKTRLETAITTAASSKTSFDEKNPELIKAYNALKETLKNEKSNLDSVMTAEFAAIKNNLDSLYQTAKTLVEGTLQPKMGNSPQVEVVNQANTNISNAVSKLETWKTNANTLATSFVKEVLVKNKLTGIDTTNNQEQPGNYSFVGYGVDVTTGSNNARPNWSFAKRIVWTNTGGNNLPLAYESQNSVPLTDVSWIYSLSGTNAKYTLTFDYYGASSNGYLYFPYKLVKKEDKVALQYSLNRTAPKAIEFKPAATKEITTTQSGSSDASSASSP…
Rlow	480651	482838	+	33	9	TAAAGATGTGCGGTTTTAACTATAAAAACTAATAAAACTCTTTGTTTTTA	GAAGAAGAAGAAGAAGAAGAAGAAGAA	GTTCTTAGGAGTTCTGGGGTTTTCGTTTGGTCTGATCGGCGAAAATAAAC	VKKKNILKFVSLLGIGSFVMVAAASCTSATTPNPTPTPNPEPKPNPGGGGGMSGGNTNPSDGQGMMNAAAKELAAAKTALTTLLNGQTEKVGLYNDYAKIKDDLVKAYTAAKEISDKSDVTLQEVNNAKTRLETAITTAASSKTSFDEKNPELIKAYNALKETLKNEKSNLDSVMTAEFAAIKNNLDSLYQTAKTLVEGTLQPKMGNSPQVEVVNQANTNISNAVSKLETWKTNANTLATSFVKEVLVKNKLTGIDTTNNQEQPGNYSFVGYGVDVTTGSNNARPNWSFAKRIVWTNTGGNNLPLAYESQNSVPLTDVSWIYSLSGTNAKYTLTFDYYGASSNGYLYFPYKLVKKEDKVALQYSLNRTAPKAIEFKPAATKEITTTQSGSSDASSASSP…
CA06	458414	460544	+	34	10	ATTGAGTTGTTGTATTTAATATATAAAATAGCTAAAATCCTTTAAAAATC	GAAGAAGAAGAAGAAGAAGAAGAAGAAGAA	GTTCTTAGAAGTTTAGGAGTTAGCGACTGCTCTGATCAGCGAAAATAAAT	VKRKNILKFVSLLGIGSFVMLAAASCTSATTPTPNPEPNPIPNPGGGMSGGNTNPGNGGGMDNSAQQLAAAKTALTTLLNTKSEKVGLYSDYAKIKDQLVKAYTAAKEISDKSDATLQEVNNAKTTLETAINVAATSKQTFDSQHASLVTAYKELKTAISNEETTLAAYTQEQFSGIKMHLTALYNAGKELTNKTLETVEGVVLDTQAVVDANTKLREATKEDVLTQQKQNATMLADSFVKQVINKTDIVSTTNMAPQPGNYSFVGYSVDVSGGTGNQNNAPNWNFAKRIVWTNTNNKNRPLANQSENSVPLTDVSWIYSLTGAGAKYTLTFNYYGPKTGYLYFPYKLVKASDEVELQYKLNDADPKAIEFKKSSATQAPAGESETLSSPDQRKPAGST…
NC96	463816	465964	+	34	12	ATTGAGTTGTTGTATTTAATATATAAAATAGCTAAAATCCTTTAAAAATC	GAAGAAGAAGAAGAAGAAGAAGAAGAAGAAGAAGAA	GTTCTTAGAAGTTTAGGAGTTAGCGACTGCTCTGATCAGCGAAAATAAAT	VKRKNILKFVSLLGIGSFVMLAAASCTTPVNPTPNPTPTPNPEPNPIPNPGGGMSGGNTNPGNGGGMDNSAQQLAAAKTALTTLLNTKSEKVGLYSDYAKIKDQLVKAYTAAKEISDKSDATLQEVNNAKTTLETAINVAATSKQTFDSQHASLVTAYKELKTAISNEETTLAAYTQEQFSGIKMHLTALYNAGKELTNKTLETVEGVVLDTQAVVDANTKLREATKEDVLTQQKQNATMLADSFVKQVINKTDIVSTTNMAPQPGNYSFVGYSVDVSGGTGNQNNAPNWNFAKRIVWTNTNNKNRPLANQSENSVPLTDVSWIYSLTGAGAKYTLTFNYYGPKTGYLYFPYKLVKASDEVELQYKLNDADPKAIEFKKSSATQAPAGESETLSSPDQR…
NY01	547585	549733	-	34	11	ATTGAGTTGTTGTATTTAATATATAAAATAGCTAAAATCCTTTAAAAATC	GAAGAAGAAGAAGAAGAAGAAGAAGAAGAAGAA	GTTCTTAGAAGTTTAGGAGTTAGCGACTGCTCTGATCAGCGAAAATAAAT	VKRKNILKFVSLLGIGSFVMLAAASCTTPVNPTPNPTPTPNPEPNPIPNPGGGMSGGNTNPGNGGGMDNSAQQLAAAKTALTTLLNTKSEKVGLYSDYAKIKDQLVKAYTAAKEISDKSDATLQEVNNAKTTLETAINVAATSKQTFDSQHASLVTAYKELKTAISNEETTLAAYTQEQFSGIKMHLTALYNAGKELTNKTLETVEGVVLDTQAVVDANTKLREATKEDVLTQQKQNATMLADSFVKQVINKTDIVSTTNMAPQPGNYSFVGYSVDVSGGTGNQNNAPNWNFAKRIVWTNTNNKNRPLANQSENSVPLTDVSWIYSLTGAGAKYTLTFNYYGPKTGYLYFPYKLVKASDEVELQYKLNDADPKAIEFKKSSATQAPAGESETLSSPDQR…
Rhigh	483110	485333	+	34	10	ATTTAGTTGTTGTATTCACTATATAAAACGGCTAAAAGCCTTTAAACATC	GAAGAAGAAGAAGAAGAAGAAGAAGAAGAA	GTTCTTAGAAGTTTAGGAGTTAGCGGATGCTCTGATCAGCGAAAATAAAC	VKRKNILKFVSLLAIGSFVMLAAASCTTPVNPTPNPAPTPNPAPTPNPEPTPPSNGGGMNGGDNNPGNGGGIDNSAQQLAAARTALTTLINSRSQNTELYVDYAKIQDTLVKAYDAAEAVLDNTVSTTQNINQAKTTLETAINAAATSKQTFDSQHALLVTAYKDLKTAISNEETTLAVYTQEQFSGIKMHLTALYNAGKALTNRTLETVEGVVLDTQAVVDANTKLREATKEDVLTQQKQNATMLADSFVKQAINKTNITGTTNMAPQPGNYSFVGFSVDINTTANAKNGTNPTWNFARRSVWTNVNKKNQPLSEETSAGLTDVSWIYSLTGTGAKYTLEFSYYGPSTGYLYFPYKLVKESDKDMVALQYSLNGATTPAAVEFKAATVTQPAPAGQQS…
Rlow	483196	485419	+	34	8	ATTTAGTTGTTGTATTCACTATATAAAACGGCTAAAAGCCTTTAAACATC	GAAGAAGAAGAAGAAGAAGAAGAA	GTTCTTAGAAGTTTAGGAGTTAGCGGATGCTCTGATCAGCGAAAATAAAC	VKRKNILKFVSLLAIGSFVMLAAASCTTPVNPTPNPAPTPNPAPTPNPEPTPPSNGGGMNGGDNNPGNGGGIDNSAQQLAAARTALTTLINSRSQNTELYVDYAKIQDTLVKAYDAAEAVLDNTVSTTQNINQAKTTLETAINAAATSKQTFDSQHALLVTAYKDLKTAISNEETTLAVYTQEQFSGIKMHLTALYNAGKALTNRTLETVEGVVLDTQAVVDANTKLREATKEDVLTQQKQNATMLADSFVKQAINKTNITGTTNMAPQPGNYSFVGFSVDINTTANAKNGTNPTWNFARRSVWTNVNKKNQPLSEETSAGLTDVSWIYSLTGTGAKYTLEFSYYGPSTGYLYFPYKLVKESDKDMVALQYSLNGATTPAAVEFKAATVTQPAPAGQQS…
S6	579190	581509	-	34	13	GAATTGTATTTGTGATTGAAGAATAAATATCAATAAAACCCTTTGTTTTC	GAAGAAGAAGAAGAAGAAGAAGAAGAAGAAGAAGAAGAA	GTTCTTAGAAGTTTAGTGGTATGGGGTTGGGCAAGTGAGCGAAAATTAAG	MKRKNILKFVSLLGIGSFVMLAAASCTKPVDPTPNPTPNPTPNPTPNPTPNPTPNPTPNPTPTPNPEPKPDPMPNPGGGGMRGGDTDTNPGNGGGTDNAAQQLAAAKTALTTLINSRSQNTELYVDYAKIQDTLVKAYDAAKAVLDNTVSTTQNINQAKTTLETAINVAATSKQTFDSQHASLVTAYKELKTAISNEEATLAAYTQEQFFGIKMHLTALYNAGKALINKTLETVEGVVLDTQAVVNANTKLREATKEDVLSQQKQNATMLSNNFVKQTINKANITGTTNAGSQPGNYSFVGFSVDLDTITTNNNQISKQTNSTLPNWNFAQRSVWINTNGKNHPINQSENSTPLTDVSWIYSLSGRNTKYRLTFNWYGPEMGYLYFPYKLVKDNQQVAL…
W101	265262	267401	+	34	8	TTGTTGTATTTAATATATAAAATAGCTAAAATCCTTTAAAAATCGAAAAA	GAAGAAGAAGAAGAAGAAGAAGAA	GTTCTTAGAAGTTTAGGAGTTAGCGACTGCTCTGATCAGCGAAAATAAAT	VKRKNILKFVSLLGIGSFVMLAAASCTTPVNPTPNPTPTPNPEPNPIPNPGGGMSGGNTNPGNGGGMDNSAQQLAAAKTALTTLLNTKSEKVGLYSDYAKIKDQLVKAYTAAKEISDKSDATLQEVNNAKTTLETAINVAATSKQTFDSQHASLVTAYKELKTAISNEETTLAAYTQEQFSGIKMHLTALYNAGKELTNKTLETVEGVVLDTQAVVDANTKLREATKEDVLTQQKQNATMLADSFVKQVINKTDIVSTTNMAPQPGNYSFVGYSVDVSGGTGNQNNAPNWNFAKRIVWTNTNNKNRPLANQSENSVPLTDVSWIYSLTGAGAKYTLTFNYYGPKTGYLYFPYKLVKASDEVELQYKLNDADPKAIEFKKSSATQAPAGESETLSSPDQR…
Rhigh	492796	494782	+	35	14	ATTGAGTTGTTGTATTTAATATATAAAATAACTAAAATCCTTTAAAAATA	GAAGAAGAAGAAGAAGAAGAAGAAGAAGAAGAAGAAGAAGAA	GTTCTTAGAAGTTCTGGAGTCTTGGTTTGGCTTGATGAGCGAAAATAAAC	VKRKNILKFVSLLGIGSFVMLAAASCTTPVNPTPNPTPNPEPKPNPTPNPEPKPMPNPGGGGESMDNAAQELAAARTALTSLLASKNANVEMYSDYAKIKNDLTAAYTTAEQTSQNSSATLEQVKNATSTLQTAINTANSNKQKFDQDHSELLTSYKNLKTVVGKKDAVVMELKDSKYSAILNEINSASLKAEKIIKETLDPISGEIPTSKMITDGTANIEKVINSETLMSQKENADQFANFKAYTIVKEKIMGTDDTHNQAQPANYSFVGYSVDVTGTTTAPGSETALPNWNYAQRTIFTSGDQPTKIDTPAASDETPAQPLSNVSWIYSLAGNGAKYTLDFTYYGPSTGYLYFPYKLVKNSDSVGLQYKLNNIPTETAITFGNMQNANGPTATVDSI…
Rlow	492855	494841	+	35	13	ATTGAGTTGTTGTATTTAATATATAAAATAACTAAAATCCTTTAAAAATA	GAAGAAGAAGAAGAAGAAGAAGAAGAAGAAGAAGAAGAA	GTTCTTAGAAGTTCTGGAGTCTTGGTTTGGCTTGATGAGCGAAAATAAAC	VKRKNILKFVSLLGIGSFVMLAAASCTTPVNPTPNPTPNPEPKPNPTPNPEPKPMPNPGGGGESMDNAAQELAAARTALTSLLASKNANVEMYSDYAKIKNDLTAAYTTAEQTSQNSSATLEQVKNATSTLQTAINTANSNKQKFDQDHSELLTSYKNLKTVVGKKDAVVMELKDSKYSAILNEINSASLKAEKIIKETLDPISGEIPTSKMITDGTANIEKVINSETLMSQKENADQFANFKAYTIVKEKIMGTDDTHNQAQPANYSFVGYSVDVTGTTTAPGSETALPNWNYAQRTIFTSGDQPTKIDTPAASDETPAQPLSNVSWIYSLAGNGAKYTLDFTYYGPSTGYLYFPYKLVKNSDSVGLQYKLNNIPTETAITFGNMQNANGPTATVDSI…
CA06	463384	465280	+	36	10	ATTTAGTTGTTGTATTCACTATATAAAATGGCTAAAAACCTTTAAACATC	GAAGAAGAAGAAGAAGAAGAAGAAGAAGAA	GTTCTTAGAAGTTTTAAGTTTTCAGGCTGTTTTTATGGATGACAATTAAG	VKRKNILKFVSLLGIGSFVMLAAASCTSATTPTPNPEPKPNPAPKPDPMPNPGGGMMGGMNGGNTNPGNGGGTDNAAQQLAAAKKELSDLLATQNSNLSTYADYANIQNTITAAYTTAKSTSDNTSATLEQVKSATSTLQTAIDTAASSKTSFDEKNPELIKAYNALKETLKNEETVLGGLTDSNFATIKTNLTALYKSGKDIVTKTLDPIMGTAIDHSAVTQANTNISNATSKLEDWKTNANTLATSFVKEVLVKNKLTGIDTTNNQEQPGNYSFVGYSVDVTTGSNNARPNWNFAQRKVWTSEGQNGGSTILVETPISKTDVSWIYNLKGTGTKYTLNFNYYGPSTAYLYFPYKLVKTTDAAKVALQYKLNNGAQKLIQFAPSSTTTDMPSTREPTS…
NC96	468795	470691	+	36	7	ATTTAGTTGTTGTATTCACTATATAAAATGGCTAAAAACCTTTAAACATC	GAAGAAGAAGAAGAAGAAGAA	GTTCTTAGAAGTTTTAAGTTTTCAGGCTGTTTTTATGGATGACAATTAAG	VKRKNILKFVSLLGIGSFVMLAAASCTSATTPTPNPEPKPNPAPKPDPMPNPGGGMMGGMNGGNTNPGNGGGTDNAAQQLAAAKKELSDLLATQNSNLSTYADYANIQNTITAAYTTAKSTSDNTSATLEQVKSATSTLQTAIDTAASSKTSFDEKNPELIKAYNALKETLKNEETVLGGLTDSNFATIKTNLTALYKSGKDIVTKTLDPIMGTAIDHSAVTQANTNISNATSKLEDWKTNANTLATSFVKEVLVKNKLTGIDTTNNQEQPGNYSFVGYSVDVTTGSNNARPNWNFAQRKVWTSEGQNGGSTILVETPISKTDVSWIYNLKGTGTKYTLNFNYYGPSTAYLYFPYKLVKTTDAAKVALQYKLNNGAQKLIQFAPSSTTTDMPSTREPTS…
Rhigh	497529	499458	+	36	11	TAACTGTATGTGGTTTCAACTATAAAAACTTATAAAATCCTTTGTTTTTC	GAAGAAGAAGAAGAAGAAGAAGAAGAAGAAGAA	GTTATTAGAAGTTTAGGAGTTAGCGACTGCTCTGATCAGCGAAAATAAAT	VKRKNILKFVSLLGIGSFVMLAAASCTSATTPTPNPEPKPDPMPNPPSGGMNGGDTNPGNDGGMENSAQQLSTAKTALTNLLSSKNTNVQMYSDYAKIKNDLTAAYTTAKSTSDNTSATLEQVKSATSTLQAAIDKAASDKKTFDDQNSDLVTAYEELKVTLQSQSTVLEKLSDPQYESIKKHITSLYDAGTLITTKTLDPSNGDKPKAEEVTSANNGIKNAINETTLTNWKNNADKFYKNFDKNKLSKDKLKSVDASNNQSQPTNYSFVAFSSDLTTTSGSQTDFPNWNFAQRKVWTSEGQNGGSTILVETPISKTDVSWIYNLKGTGTKYTLDFNYYGPSTAYLYFPYKLVKTTDAAKVALQYKLNNGAQKLIQFAPSSTTTDMPSTREPTNPRSSS…
Rlow	497645	499574	+	36	27	TAACTGTATGTGGTTTCAACTATAAAAACTTATAAAATCCTTTGTTTTTC	GAAGAAGAAGAAGAAGAAGAAGAAGAAGAAGAAGAAGAAGAAGAAGAAGAAGAAGAAGAAGAAGAAGAAGAAGAAGAAGAA	GTTATTAGAAGTTTAGGAGTTAGCGACTGCTCTGATCAGCGAAAATAAAT	VKRKNILKFVSLLGIGSFVMLAAASCTSATTPTPNPEPKPDPMPNPPSGGMNGGDTNPGNDGGMENSAQQLSTAKTALTNLLSSKNTNVQMYSDYAKIKNDLTAAYTTAKSTSDNTSATLEQVKSATSTLQAAIDKAASDKKTFDDQNSDLVTAYEELKVTLQSQSTVLEKLSDPQYESIKKHITSLYDAGTLITTKTLDPSNGDKPKAEEVTSANNGIKNAINETTLTNWKNNADKFYKNFDKNKLSKDKLKSVDASNNQSQPTNYSFVAFSSDLTTTSGSQTDFPNWNFAQRKVWTSEGQNGGSTILVETPISKTDVSWIYNLKGTGTKYTLDFNYYGPSTAYLYFPYKLVKTTDAAKVALQYKLNNGAQKLIQFAPSSTTTDMPSTREPTNPRSSS…
Rhigh	611077	611374	-	37	6	AGATAAGTAGTTGTAAGTACGATAAAAACAAGGTAAAACCTTTTGTTTTC	GAAGAAGAAGAAGAAGAA	GTTCTTAGGAGTTCTATGGTCTGGGGTTGGTTTGATCAGCGAAAATAAAC	VKRKNILKFVSLLGIGSFVMLSAASCTSATTPTPNPEPKPNPTPNPEPKPMPNPGGGGESMDNAAQELAAARTALTSLLASKNANVEMYSDMPKSKTT
Rlow	611232	611529	-	37	7	AGATAAGTAGTTGTAAGTACGATAAAAACAAGGTAAAACCTTTTGTTTTC	GAAGAAGAAGAAGAAGAAGAA	GTTCTTAGGAGTTCTATGGTCTGGGGTTGGTTTGATCAGCGAAAATAAAC	VKRKNILKFVSLLGIGSFVMLSAASCTSATTPTPNPEPKPNPTPNPEPKPMPNPGGGGESMDNAAQELAAARTALTSLLASKNANVEMYSDMPKSKTT
CA06	809879	811925	-	38	13	ATTGAGTTGTTGTATCTAATATATAAAATAGCTAAAATCCTTTAAAAATC	GAAGAAGAAGAAGAAGAAGAAGAAGAAGAAGAAGAAGAA	CTTAGAAGTTTAGAGGTTTGGGGCTCGTCTGATCGACGAAAATAAACACG	VKRKNILKFVSLLGIGSFVMLAAASCTSATTPTPNPEPKPNPEPKPDPMPNPPSGGNMNGGDTNPGNGGGMDNAVQQLAAAKTALTTLLNGQTEKVGLYNDYAKIKDDLVKAYIAAKEISDKSHATLQEVNNAKTRLETAIKDAANSKTSFDEKNSELIKAYDALKQTITSEEMSLNQLMDANFETIKNHISNLYKQGKDIITATLDPTTGDGPQAMVVNQTNETIVNATSKLED
NC08	768082	770168	-	38	10	TAAATTATTTCTGAATCAACTGTAAAAACGAATGAAACCCTTTGTTTTTC	GAAGAAGAAGAAGAAGAAGAAGAAGAAGAA	GTTCTTAGAAGTTCTGTGGTCTGGGGTTGGTTTGATCAGCGAAAATAAAC	VKRKNILKFVSLLGIGSFVMLAAASCTSATTPTPNPEPKPDPMPNPPSGGMNGGDTNPGNGGGMDNSAQQLAAAKTALTTLLNTKSEKVGLYSDYAKIKDDLVKAYTAAKEISDKSDATLQEVNNAKTTLETAITTAASSKTSFDEKKSWINQSI
Rhigh	818886	821002	-	38	18	ACTATTTTTTTTGAATTAATGACAAAAAACGCTAAAACCTTTTATTTCTA	GAAGAAGAAGAAGAAGAAGAAGAAGAAGAAGAAGAAGAAGAAGAAGAAGAAGAA	GTTCTTAGAAGTTTAGAGGTTTGGGACTCGTCTGATAGACGAAAATAAAC	VKRKNILKFVSLLGIGSFVMLAATSCTSATAPTPNPTPNPEPKPDPMPNPPSGGMNDGNTNPGMDTAAQELASAKAALTTLTNSESEKVGLYVDYAKIKADLTSAYTVAKTTSDSSTSTLDQVKTATSKLQTAIDKAASDKQKFEQDHKDLLMPYS
Rlow	820753	821224	-	38	11	ACTATTTTTTTTGAATTAATGACAAAAAACGCTAAAACCTTTTATTTCTA	GAAGAAGAAGAAGAAGAAGAAGAAGAAGAAGAA	GTTCTTAGAAGTTTAGAGGTTTGGGACTCGTCTGATAGACGAAAATAAAC	VKRKNILKFVSLLGIGSFVMLAATSCTSATAPTPNPTPNPEPKPDPMPNPPSGGMNDGNTNPGMDTAAQELASAKAALTTLTNSESEKVGLYVDYAKIKADLTSAYTVAKTTSDSSTSTLDQVKTATSKLQTAIDKAASDKQKFEQDHKDLLMPYS
CA06	456108	458109	+	39	16	TCTTTATTTTTTGGTTTAAAAATAAAAAACGTTAAAACCCTTATTTTCTA	GAAGAAGAAGAAGAAGAAGAAGAAGAAGAAGAAGAAGAAGAAGAAGAA	GTTCTTAGAAGTTTAGAGGTTTGGGGCTCGTCTGATCGACGAAAATAAAC	VKRKNILKFVSLLGIGSFVMLAAASCTSATTPTPNPEPKPTPNPEPKPTPMPNPGGGGDINNPPSGGMNGGDTNPGNDGGMDNAAQQLAAARTALTNLLSSKNANVQMYSDYAKIKNDLTAAYISAETASQNQAATLEQVKSATSTLQTAINTAVNEKKVFDENNSELVTAYTNLKTTLEGENTTLDAFNDSANYGGIKTHLMSLYNQAKTITTSTLLNDAGQSPNKDNVVKINKEITDAINPTLLNQQKANADMLATSFTKQVLNDAQLTSGSSETSMQTQPQPGNYSFVGYSNDLDHKIAGNAGNPPSNLPTWNFAQRKVWTSETKTKNGSTDIVESPTSKTDVSWIYSLSGEGTKYTLEFTYYGPSTAYLYFPYKLVKSADSSLVALQYKLNGGEQ…
NC96	461504	463505	+	39	11	TCTTTATTTTTTGGTTTAAAAATAAAAAACGTTAAAACCCTTATTTTCTA	GAAGAAGAAGAAGAAGAAGAAGAAGAAGAAGAA	GTTCTTAGAAGTTTAGAGGTTTGGGGCTCGTCTGATCGACGAAAATAAAC	VKRKNILKFVSLLGIGSFVMLAAASCTSATTPTPNPEPKPTPNPEPKPTPMPNPGGGGDINNPPSGGMNGGDTNPGNDGGMDNAAQQLAAARTALTNLLSSKNANVQMYSDYAKIKNDLTAAYISAETASQNQAATLEQVKSATSTLQTAINTAVNEKKVFDENNSELVTAYTNLKTTLEGENTTLDAFNDSANYGGIKTHLMSLYNQAKTITTSTLLNDAGQSPNKDNVVKINKEITDAINPTLLNQQKANADMLATSFTKQVLNDAQLTSGSSETSMQTQPQPGNYSFVGYSNDLDHKIAGNAGNPPSNLPTWNFAQRKVWTSETKTKNGSTDIVESPTSKTDVSWIYSLSGEGTKYTLEFTYYGPSTAYLYFPYKLVKSADSSLVALQYKLNGGEQ…
Rhigh	821368	823313	-	39	9	AAAACATTTCTCTGAATTTGCTATAAAAATTGGTGAAACCTTTTATTTTC	GAAGAAGAAGAAGAAGAAGAAGAAGAA	ATTCTTAGGAGTTCTGGGGTTTGGGGCTGGTCTGATCGGCGAAAATAAAC	MLAAASCTSATTPTPNPEPKPDPMPNPPSGGMNGGDTNPGGGQNMMNAASQELEAARMGLTTVFDSKAKNLGLYVGYKKTQQNLTKAYDAAKNVLDNSSSTTQNLNEAKTRLETAIRTAATSKQTFDEQHAELVKVYKELKTTLSNETATLAPYADSQYAGIKMHLSGLYDAGKAITTKTLEPVEGDPLTASAVMMANTKIVEAIKDEVLNPQKENATKLADSFVKQVINKTKITGTTKTENQPGNYSFVGFSNDLDHKIAGNAGNPPSNLPTWNFAQRKVWTSETKTKNGSTDIVESPTSKTDVSWIYSLSGETTKYTLEFIYYGPSTVYLYFPYKLVKSADSSLVALQYKLNGGEQQPITFAADNQQNVEATANKTPTVSDINVAKVSLSGLKFGSN…
Rlow	821569	823510	-	39	8	AAAACATTTCTCTGAATTTGCTATAAAAATTGGTGAAACCTTTTATTTTC	GAAGAAGAAGAAGAAGAAGAAGAA	ATTCTTAGGAGTTCTGGGGTTTGGGGCTGGTCTGATCGGCGAAAATAAAC	MLAAASCTSATTPTPNPEPKPDPMPNPPSGGMNGGDTNPGGGQNMMNAASQELEAARMGLTTVFDSKAKNLGLYVGYKKTQQNLTKAYDAAKNVLDNSSSTTQNLNEAKTRLETAIRTAATSKQTFDEQHAELVKVYKELKTTLSNETATLAPYADSQYAGIKMHLSGLYDAGKAITTKTLEPVEGDPLTASAVMMANTKIVEAIKDEVLNPQKENATKLADSFVKQVINKTKITGTTKTENQPGNYSFVGFSNDLDHKIAGNAGNPPSNLPTWNFAQRKVWTSETKTKNGSTDIVESPTSKTDVSWIYSLSGETTKYTLEFIYYGPSTVYLYFPYKLVKSADSSLVALQYKLNGGEQQPITFAADNQQNVEATANKTPTVSDINVAKVSLSGLKFGSN…
Rhigh	826006	828211	-	40	9	ATAAATTATTTCTGAATTAATTGCAAAAATGAATGAAACCTTTTGTTTGC	GAAGAAGAAGAAGAAGAAGAAGAAGAA	GTTCTTAGAAGTTTAGAGGTTTGGGGCTCGTCTGATCGACGAAAATAAAC	VKRKNILKFVSLLGIGSFVMLAAASCTTPVNPTPNPTPNPTPTPNPEPNPPSGGNMNGGNTNPSDGQGMMNAAAKELADAKAALTSLIGSKDQNTKLYADYEKIQDTLVKAYDAAEATLNNSASTTQNLKDAETTLQAAISTAASSKQTFNQQNNALVTAYNQLKTAVGNESATLAKVEDAKFARIKENLVTLYNAGKMLTAKPLEGIDGAVLDVDQVTQANTKLQEATNENSLTQQTQNATNLADSFVKQVINKTKITGTTNTEKQPGNYSFVGYSVDLNTITTRTGNNSQTSSSSDNLPSWNFAQRIVWTNTANKNFPLADQTENSVPLTDVSWIYSLSGMNAKYTLTFNYYGPDTAYLYFPYKLVKTNDRAELQYSLNGANAKLIEFKPAPTVPPV…
Rlow	826200	828405	-	40	13	ATAAATTATTTCTGAATTAATTGCAAAAATGAATGAAACCTTTTGTTTGC	GAAGAAGAAGAAGAAGAAGAAGAAGAAGAAGAAGAAGAA	GTTCTTAGAAGTTTAGAGGTTTGGGGCTCGTCTGATCGACGAAAATAAAC	VKRKNILKFVSLLGIGSFVMLAAASCTTPVNPTPNPTPNPTPTPNPEPNPPSGGNMNGGNTNPSDGQGMMNAAAKELADAKAALTSLIGSKDQNTKLYADYEKIQDTLVKAYDAAEATLNNSASTTQNLKDAETTLQAAISTAASSKQTFNQQNNALVTAYNQLKTAVGNESATLAKVEDAKFARIKENLVTLYNAGKMLTAKPLEGIDGAVLDVDQVTQANTKLQEATNENSLTQQTQNATNLADSFVKQVINKTKITGTTNTEKQPGNYSFVGYSVDLNTITTRTGNNSQTSSSSDNLPSWNFAQRIVWTNTANKNFPLADQTENSVPLTDVSWIYSLSGMNAKYTLTFNYYGPDTAYLYFPYKLVKTNDRAELQYSLNGANAKLIEFKPAPTVPPV…
CA06	578362	580408	-	42	13	ATTGAGTTGTTGTATCTAATATATAAAATAGCTAAAATCCTTTAAAAATC	GAAGAAGAAGAAGAAGAAGAAGAAGAAGAAGAAGAAGAA	CTTAGAAGTTTAGAGGTTTGGGGCTCGTCTGATCGACGAAAATAAACACG	VKRKNILKFVSLLGIGSFVMLAAASCTSATTPTPNPEPKPNPEPKPDPMPNPPSGGNMNGGDTNPGNGGGMDNAVQQLAAAKTALTTLLNGQTEKVGLYNDYAKIKDDLVKAYIAAKEISDKSHATLQEVNNAKTRLETAIKDAANSKTSFDEKNPELIKAYDALKQTITSEEMSLNQLMDANFETIKNHISNLYKQGKDIITATLDPTTGDGPQAMVVNQTNETIVNATSKLEDWKTNATNLATRFVKQTLNNANLVNETNNQQQPGNYSFVAYASDIASPNWNFAQRTVWTADNNLVTSPLPNNSQNSAPLTDVSWIYTLSGTGAKYTLTFDYYGPQTGYLYFPYKLVKDADKNNIGLQYKLNDGNFEQINFAPAPTEPARSTMPQTAPENQTSGEN…
MC06	554358	556404	-	42	15	ATTGAGTTGTTGTATCTAATATATAAAATAGCTAAAATCCTTTAAAAATC	GAAGAAGAAGAAGAAGAAGAAGAAGAAGAAGAAGAAGAAGAAGAA	CTTAGAAGTTTAGAGGTTTGGGGCTCGTCTGATCGACGAAAATAAACACG	VKRKNILKFVSLLGIGSFVMLAAASCTSATTPTPNPEPKPNPEPKPDPMPNPPSGGNMNGGDTNPGNGGGMDNAVQQLAAAKTALTTLLNGQTEKVGLYNDYAKIKDDLVKAYIAAKEISDKSHATLQEVNNAKTRLETAIKDAANSKTSFDEKNPELIKAYDALKQTITSEEMSLNQLMDANFETIKNHISNLYKQGKDIITATLDPTTGDGPQAMVVNQTNETIVNATSKLEDWKTNATNLATRFVKQTLNNANLVNETNNQQQPGNYSFVAYASDIASPNWNFAQRTVWTADNNLVTSPLPNNSQNSAPLTDVSWIYTLSGTGAKYTLTFDYYGPQTGYLYFPYKLVKDADKNNIGLQYKLNDGNFEQINFAPAPTEPARSTMPQTAPENQTSGEN…
MC06	785368	787414	-	42	9	TTGTATCTAATATATAAAATAGCTAAAATCCTTTAAAAATCGAAGAATAA	GAAGAAGAAGAAGAAGAAGAAGAAGAA	CTTAAAAGTTTAGAGGTTTGGGGCTCGTCTGATCGACGAAAATAAACACG	VKRKNILKFVSLLGIGSFVMLAAASCTSATTPTPNPEPKPNPEPKPDPMPNPPSGGNMNGGDTNPGNGGGMDNAVQQLAAAKTALTTLLNGQTEKVGLYNDYAKIKDDLVKAYIAAKEISDKSHATLQEVNNAKTRLETAIKDAANSKTSFDEKNPELIKAYDALKQTITSEEMSLNQLMDANFETIKNHISNLYKQGKDIITATLDPTTGDGPQAMVVNQTNETIVNATSKLEDWKTNATNLATRFVKQTLNNANLVNETNNQQQPGNYSFVAYASDIASPNWNFAQRTVWTADNNLVTSPLPNNSQNSAPLTDVSWIYTLSGTGAKYTLTFDYYGPQTGYLYFPYKLVKDADKNNIGLQYKLNDGNFEQINFAPAPTEPARSTMPQTAPENQTSGEN…
NC08	549429	551475	-	42	7	ATTGAGTTGTTGTATCTAATATATAAAATAGCTAAAATCCTTTAAAAATC	GAAGAAGAAGAAGAAGAAGAA	CTTAGAAGTTTAGAGGTTTGGGGCTCGTCTGATCGACGAAAATAAACACG	VKRKNILKFVSLLGIGSFVMLAAASCTSATTPTPNPEPKPNPEPKPDPMPNPPSGGNMNGGDTNPGNGGGMDNAVQQLAAAKTALTTLLNGQTEKVGLYNDYAKIKDDLVKAYIAAKEISDKSHATLQEVNNAKTRLETAIKDAANSKTSFDEKNPELIKAYDALKQTITSEEMSLNQLMDANFETIKNHISNLYKQGKDIITATLDPTTGDGPQAMVVNQTNETIVNATSKLEDWKTNATNLATRFVKQTLNNANLVNETNNQQQPGNYSFVAYASDIASPNWNFAQRTVWTADNNLVTSPLPNNSQNSAPLTDVSWIYTLSGTGAKYTLTFDYYGPQTGYLYFPYKLVKDADKNNIGLQYKLNDGNFEQINFAPAPTEPARSTMPQTAPENQTSGEN…
NC08	772916	774962	-	42	11	ATTGAGTTGTTGTATCTAATATATAAAATAGCTAAAATCCTTTAAAAATC	GAAGAAGAAGAAGAAGAAGAAAAAGAAGAAGAA	CTTAGAAGTTTAGAGGTTTGGGGCTCGTCTGATCGACGAAAATAAACACG	VKRKNILKFVSLLGIGSFVMLAAASCTSATTPTPNPEPKPNPEPKPDPMPNPPSGGNMNGGDTNPGNGGGMDNAVQQLAAAKTALTTLLNGQTEKVGLYNDYAKIKDDLVKAYIAAKEISDKSHATLQEVNNAKTRLETAIKDAANSKTSFDEKNPELIKAYDALKQTITSEEMSLNQLMDANFETIKNHISNLYKQGKDIITATLDPTTGDGPQAMVVNQTNETIVNATSKLEDWKTNATNLATRFVKQTLNNANLVNETNNQQQPGNYSFVAYASDIASPNWNFAQRTVWTADNNLVTSPLPNNSQNSAPLTDVSWIYTLSGTGAKYTLTFDYYGPQTGYLYFPYKLVKDADKNNIGLQYKLNDGNFEQINFAPAPTEPARSTMPQTAPENQTSGEN…
NC95	554885	556931	-	42	7	ATTGAGTTGTTGTATCTAATATATAAAATAGCTAAAATCCTTTAAAAATC	GAAGAAGAAGAAGAAGAAGAA	CTTAGAAGTTTAGAGGTTTGGGGCTCGTCTGATCGACGAAAATAAACACG	VKRKNILKFVSLLGIGSFVMLAAASCTSATTPTPNPEPKPNPEPKPDPMPNPPSGGNMNGGDTNPGNGGGMDNAVQQLAAAKTALTTLLNGQTEKVGLYNDYAKIKDDLVKAYIAAKEISDKSHATLQEVNNAKTRLETAIKDAANSKTSFDEKNPELIKAYDALKQTITSEEMSLNQLMDANFETIKNHISNLYKQGKDIITATLDPTTGDGPQAMVVNQTNETIVNATSKLEDWKTNATNLATRFVKQTLNNANLVNETNNQQQPGNYSFVAYASDIASPNWNFAQRTVWTADNNLVTSPLPNNSQNSAPLTDVSWIYTLSGTGAKYTLTFDYYGPQTGYLYFPYKLVKDADKNNIGLQYKLNDGNFEQINFAPAPTEPARSTMPQTAPENQTSGEN…
NC95	786317	788363	-	42	7	ATTGAGTTGTTGTATCTAATATATAAAATAGCTAAAATCCTTTAAAAATC	GAAGAAGAAGAAGAAGAAGAA	CTTAGAAGTTTAGAGGTTTGGGGCTCGTCTGATCGACGAAAATAAACACG	VKRKNILKFVSLLGIGSFVMLAAASCTSATTPTPNPEPKPNPEPKPDPMPNPPSGGNMNGGDTNPGNGGGMDNAVQQLAAAKTALTTLLNGQTEKVGLYNDYAKIKDDLVKAYIAAKEISDKSHATLQEVNNAKTRLETAIKDAANSKTSFDEKNPELIKAYDALKQTITSEEMSLNQLMDANFETIKNHISNLYKQGKDIITATLDPTTGDGPQAMVVNQTNETIVNATSKLEDWKTNATNLATRFVKQTLNNANLVNETNNQQQPGNYSFVAYASDIASPNWNFAQRTVWTADNNLVTSPLPNNSQNSAPLTDVSWIYTLSGTGAKYTLTFDYYGPQTGYLYFPYKLVKDADKNNIGLQYKLNDGNFEQINFAPAPTEPARSTMPQTAPENQTSGEN…
NC96	584055	586101	-	42	11	ATTGAGTTGTTGTATCTAATATATAAAATAGCTAAAATCCTTTAAAAATC	GAAGAAGAAGAAGAAGAAGAAGAAGAAGAAGAA	CTTAGAAGTTTAGAGGTTTGGGGCTCGTCTGATCGACGAAAATAAACACG	VKRKNILKFVSLLGIGSFVMLAAASCTSATTPTPNPEPKPNPEPKPDPMPNPPSGGNMNGGDTNPGNGGGMDNAVQQLAAAKTALTTLLNGQTEKVGLYNDYAKIKDDLVKAYIAAKEISDKSHATLQEVNNAKTRLETAIKDAANSKTSFDEKNPELIKAYDALKQTITSEEMSLNQLMDANFETIKNHISNLYKQGKDIITATLDPTTGDGPQAMVVNQTNETIVNATSKLEDWKTNATNLATRFVKQTLNNANLVNETNNQQQPGNYSFVAYASDIASPNWNFAQRTVWTADNNLVTSPLPNNSQNSAPLTDVSWIYTLSGTGAKYTLTFDYYGPQTGYLYFPYKLVKDADKNNIGLQYKLNDGNFEQINFAPAPTEPARSTMPQTAPENQTSGEN…
NC96	819194	821240	-	42	8	ATTGAGTTGTTGTATCTAATATATAAAATAGCTAAAATTCTTTAAAAATC	GAAGAAGAAGAAGAAGAAGAAGAA	CTTAGAAGTTTAGAGGTTTGGGGCTCGTCTGATCGACGAAAATAAACACG	VKRKNILKFVSLLGIGSFVMLAAASCTSATTPTPNPEPKPNPEPKPDPMPNPPSGGNMNGGDTNPGNGGGMDNAVQQLAAAKTALTTLLNGQTEKVGLYNDYAKIKDDLVKAYIAAKEISDKSHATLQEVNNAKTRLETAIKDAANSKTSFDEKNPELIKAYDALKQTITSEEMSLNQLMDANFETIKNHISNLYKQGKDIITATLDPTTGDGPQAMVVNQTNETIVNATSKLEDWKTNATNLATRFVKQTLNNANLVNETNNQQQPGNYSFVAYASDIASPNWNFAQRTVWTADNNLVTSPLPNNSQNSAPLTDVSWIYTLSGTGAKYTLTFDYYGPQTGYLYFPYKLVKDADKNNIGLQYKLNDGNFEQINFAPAPTEPARSTMPQTAPENQTSGEN…
NY01	566666	568712	-	42	8	ATTGAGTTGTTGTATCTAATATATAAAATAGCTAAAATCCTTTAAAAATC	GAAGAAGAAGAAGAAGAAGAAGAA	CTTAGAAGTTTAGAGGTTTGGGGCTCGTCTGATCGACGAAAATAAACACG	VKRKNILKFVSLLGIGSFVMLAAASCTSATTPTPNPEPKPNPEPKPDPMPNPPSGGNMNGGDTNPGNGGGMDNAVQQLAAAKTALTTLLNGQTEKVGLYNDYAKIKDDLVKAYIAAKEISDKSHATLQEVNNAKTRLETAIKDAANSKTSFDEKNPELIKAYDALKQTITSEEMSLNQLMDANFETIKNHISNLYKQGKDIITATLDPTTGDGPQAMVVNQTNETIVNATSKLEDWKTNATNLATRFVKQTLNNANLVNETNNQQQPGNYSFVAYASDIASPNWNFAQRTVWTADNNLVTSPLPNNSQNSAPLTDVSWIYTLSGTGAKYTLTFDYYGPQTGYLYFPYKLVKDADKNNIGLQYKLNDGNFEQINFAPAPTEPARSTMPQTAPENQTSGEN…
NY01	798057	800103	-	42	7	ATTGAGTTGTTGTATCTAATATATAAAATAGCTAAAATCCTTTAAAAATC	GAAGAAGAAGAAGAAGAAGAA	CTTAGAAGTTTAGAGGTTTGGGGCTCGTCTGATCGACGAAAATAAACACG	VKRKNILKFVSLLGIGSFVMLAAASCTSATTPTPNPEPKPNPEPKPDPMPNPPSGGNMNGGDTNPGNGGGMDNAVQQLAAAKTALTTLLNGQTEKVGLYNDYAKIKDDLVKAYIAAKEISDKSHATLQEVNNAKTRLETAIKDAANSKTSFDEKNPELIKAYDALKQTITSEEMSLNQLMDANFETIKNHISNLYKQGKDIITATLDPTTGDGPQAMVVNQTNETIVNATSKLEDWKTNATNLATRFVKQTLNNANLVNETNNQQQPGNYSFVAYASDIASPNWNFAQRTVWTADNNLVTSPLPNNSQNSAPLTDVSWIYTLSGTGAKYTLTFDYYGPQTGYLYFPYKLVKDADKNNIGLQYKLNDGNFEQINFAPAPTEPARSTMPQTAPENQTSGEN…
S6	589038	591120	-	42	18	TAAGTAGTTGTAAGTACGATAAAAACAAGGTAAAACCTTTTGTTTTCCAA	GAAGAAGAAGAAGAAGAAGAAGAAGAAGAAGAAGAAGAAGAAGAAGAAGAAGAA	GTTTTTAGAAGTTTTGGGGCTTTCGGCTGAACTAATCAGCGAAAATTAAG	VKRKNILKFVSLLGIGSFVMLAAASCTSATTPTPNPEPKPKPEPNPNPEPKPDPMPNPSSGGMNGGDTNPGNSGGMDNSAQQLSAAKTALTNLLNGQTEKVGLYNDYAKIKDDLVKAYTAAKEISDKSDATLQEVNNAKTTLETAITTAASSKTSFDEKNPELIKAYNALKQTITSEEMQLNQLKDANFETIKNHISNLYKQGKDIITATLDPTTGDGPQAMVVNQANEAIVNATSKLEDWKTNATNLATRFVKQTLNNANLVNETNNQPQPGNYSFVAYASDITSPNWNFAQRTVWTADNRARTSPLPNNSQNSAPLTDVSWIYTLSGTGAKYTLTFDYYGPQTGYLYFPYKLVKDADKNNIGLQYKLNDGNFEQINFAPTQPVESASTEPARSTMLQ…
VA94	565700	567746	-	42	6	ATTGAGTTGTTGTATCTAATATATAAAATAGCTAAAATCCTTTAAAAATC	GAAGAAGAAGAAGAAGAA	CTTAGAAGTTTAGAGGTTTGGGGCTCGTCTGATCGACGAAAATAAACACG	VKRKNILKFVSLLGIGSFVMLAAASCTSATTPTPNPEPKPNPEPKPDPMPNPPSGGNMNGGDTNPGNGGGMDNAVQQLAAAKTALTTLLNGQTEKVGLYNDYAKIKDDLVKAYIAAKEISDKSHATLQEVNNAKTRLETAIKDAANSKTSFDEKNPELIKAYDALKQTITSEEMSLNQLMDANFETIKNHISNLYKQGKDIITATLDPTTGDGPQAMVVNQTNETIVNATSKLEDWKTNATNLATRFVKQTLNNANLVNETNNQQQPGNYSFVAYASDIASPNWNFAQRTVWTADNNLVTSPLPNNSQNSAPLTDVSWIYTLSGTGAKYTLTFDYYGPQTGYLYFPYKLVKDADKNNIGLQYKLNDGNFEQINFAPAPTEPARSTMPQTAPENQTSGEN…
W101	765116	767162	-	42	7	ATTGAGTTGTTGTATCTAATATATAAAATAGCTAAAATCCTTTAAAAATC	GAAGAAGAAGAAGAAGAAGAA	CTTAGAAGTTTAGAGGTTTGGGGCTCGTCTGATCGACGAAAATAAACACG	VKRKNILKFVSLLGIGSFVMLAAASCTSATTPTPNPEPKPNPEPKPDPMPNPPSGGNMNGGDTNPGNGGGMDNAVQQLAAAKTALTTLLNGQTEKVGLYNDYAKIKDDLVKAYIAAKEISDKSHATLQEVNNAKTRLETAIKDAANSKTSFDEKNPELIKAYDALKQTITSEEMSLNQLMDANFETIKNHISNLYKQGKDIITATLDPTTGDGPQAMVVNQTNETIVNATSKLEDWKTNATNLATRFVKQTLNNANLVNETNNQQQPGNYSFVAYASDIASPNWNFAQRTVWTADNNLVTSPLPNNSQNSAPLTDVSWIYTLSGTGAKYTLTFDYYGPQTGYLYFPYKLVKDADKNNIGLQYKLNDGNFEQINFAPAPTEPARSTMPQTAPENQTSGEN…
W101	772204	774250	-	42	8	ATTGAGTTGTTGTATCTAATATATAAAATAGCTAAAATCCTTTAAAAATC	GAAGAAGAAGAAGAAGAAGAAGAA	CTTAGAAGTTTAGAGGTTTGGGGCTCGTCTGATCGACGAAAATAAACACG	VKRKNILKFVSLLGIGSFVMLAAASCTSATTPTPNPEPKPNPEPKPDPMPNPPSGGNMNGGDTNPGNGGGMDNAVQQLAAAKTALTTLLNGQTEKVGLYNDYAKIKDDLVKAYIAAKEISDKSHATLQEVNNAKTRLETAIKDAANSKTSFDEKNPELIKAYDALKQTITSEEMSLNQLMDANFETIKNHISNLYKQGKDIITATLDPTTGDGPQAMVVNQTNETIVNATSKLEDWKTNATNLATRFVKQTLNNANLVNETNNQQQPGNYSFVAYASDIASPNWNFAQRTVWTADNNLVTSPLPNNSQNSAPLTDVSWIYTLSGTGAKYTLTFDYYGPQTGYLYFPYKLVKDADKNNIGLQYKLNDGNFEQINFAPAPTEPARSTMPQTAPENQTSGEN…
NY01	550041	552042	-	43	10	TCTTTATTTTTTGGTTTAAAAATAAAAAACGTTAAAACCCTTATTTTCTA	GAAGAAGAAGAAGAAGAAGAAGAAGAAGAA	GTTCTTAGAAGTTTAGAGGTTTGGGGCTCGTCTGATCGACGAAAATAAAC	VKRKNILKFVSLLGIGSFVMLAAASCTSATTPTPNPEPKPTPNPEPKPTPMPNPGGGGDINNPPSGGMNGGDTNPGNDGGMDNAAQQLAAARTALTNLLSSKNANVQMYSDYAKIKNDLTAAYISAETASQNQAATLEQVKSATSTLQTAINTAVNEKKVFDENNSELVTAYTNLKTTLEGENTTLDAFNDSANYGGIKTHLMSLYNQAKTITTSTLLNDAGQSPNKDNVVKINKEITDAINPTLLNQQKANADMLATSFTKQVLNDAQLTSGSSETSMQTQPQPGNYSFVGYSNDLDHKIAGNAGNPPSNLPTWNFAQRKVWTSETKTKNGSTDIVESPTSKTDVSWIYSLSGEGTKYTLEFTYYGPSTAYLYFPYKLVKSADSSLVALQYKLNGGEQ…
W101	263010	264957	+	43	11	TCTTTATTTTTTGGTTTAAAAATAAAAAACGTTAAAACCCTTATTTTCTA	GAAGAAGAAGAAGAAGAAGAAGAAGAAGAAGAA	GTTCTTAGAAGTTTAGAGGTTTGGGGCTCGTCTGATCGACGAAAATAAAC	VMLAAASCTSATTPTPNPEPKPTPNPEPKPTPMPNPGGGGDINNPPSGGMNGGDTNPGNDGGMDNAAQQLAAARTALTNLLSSKNANVQMYSDYAKIKNDLTAAYISAETASQNQAATLEQVKSATSTLQTAINTAVNEKKVFDENNSELVTAYTNLKTTLEGENTTLDAFNDSANYGGIKTHLMSLYNQAKTITTSTLLNDAGQSPNKDNVVKINKEITDAINPTLLNQQKANADMLATSFTKQVLNDAQLTSGSSETSMQTQPQPGNYSFVGYSNDLDHKIAGNAGNPPSNLPTWNFAQRKVWTSETKTKNGSTDIVESPTSKTDVSWIYSLSGEGTKYTLEFTYYGPSTAYLYFPYKLVKSADSSLVALQYKLNGGEQQPITFAADNQQNVEATAN…
CA06	557210	558671	-	44	7	TAAATTATTTCTGAATCAACTGTAAAAACGAACGAAACCCCTTGTTTTTC	GAAGAAGAAGAAGAAGAAGAA	GTTCTTAGGAGTTCTGGGGTTTTCGTTTGGTCTGATCGGCGAAAATAAAC	VKRKNILKFVSLLGIGSFVMLAAASCTSATTPTPNPELKPTPKPEPKPEPMPNPPSGGMNGGDTNPSNGQGMNNAAQQLTAAKTALTTLINGETANLALYEDYAKIKNELTAAYETAKAVSAETGATLNEVNEAKSSLDATIKKAASAKNDFDSKNQSLITAYNALKATVNMETQTLEPLSADKYSGIRNSLTSLYDAAKAIIKKTLDPIDGAALVVGNVIMANSNITTATDSAKLSKEKENADMFGDGFVKQALNSQHLTADTTVTQGDTQAVPQQQPGNYSFVGYSVDVTSGSNGMMLPNWNFAQRKIRLNSNGGRTTPVTEAEKNSTPLTDVSWIYSLTSGGAKKYTFSFDYYGPSMSYLYFPYKLVKTGDSEKVGLQYTLNGNKNPVVITFGSGE…
MC06	528257	529718	-	44	7	TAAATTATTTCTGAATCAACTGTAAAAACGAACGAAACCCCTTGTTTTTC	GAAGAAGAAGAAGAAGAAGAA	GTTCTTAAAAGTTCTGGGGTTTTCGTTTGGTCTGATCGGCGAAAATAAAC	VKRKNILKFVSLLGIGSFVMLAAASCTSATTPTPNPELKPTPKPEPKPEPMPNPPSGGMNGGDTNPSNGQGMNNAAQQLTAAKTALTTLINGETANLALYEDYAKIKNELTAAYETAKAVSAETGATLNEVNEAKSSLDATIKKAASAKNDFDSKNQSLITAYNALKATVNMETQTLEPLSADKYSGIRNSLTSLYDAAKAIIKKTLDPIDGAALVVGNVIMANSNITTATDSAKLSKEKENADMFGDGFVKQALNSQHLTADTTVTQGDTQAVPQQQPGNYSFVGYSVDVTSGSNGMMLPNWNFAQRKIRLNSNGGRTTPVTEAEKNSTPLTDVSWIYSLTSGGAKKYTFSFDYYGPSMSYLYFPYKLVKTGDSEKVGLQYTLNGNKNPVVITFGSGE…
NC08	528226	529687	-	44	11	TAAATTATTTCTGAATCAACTGTAAAAACGAACGAAACCCCTTGTTTTTC	GAAGAAGAAGAAGAAGAAGAAGAAGAAGAAGAA	GTTCTTAGGAGTTCTGGGGTTTTCGTTTGGTCTGATCGGCGAAAATAAAC	VKRKNILKFVSLLGIGSFVMLAAASCTSATTPTPNPELKPTPKPEPKPEPMPNPPSGGMNGGDTNPSNGQGMNNAAQQLTAAKTALTTLINGETANLALYEDYAKIKNELTAAYETAKAVSAETGATLNEVNEAKFSLDATIKKAASAKNDFDSKNQSLITAYNALKATVNMETQTLEPLSADKYSGIRNSLTSLYDAAKAIIKKTLDPIDGAALVVGNVIMANSNITTATDSAKLSKEKENADMFGDGFVKQALNSQHLTADTTVTQGDTQAVPQQQPGNYSFVGYSVDVTSGSNGMMLPNWNFAQRKIRLNSNGGRTTPVTEAEKNSTPLTDVSWIYSLTSGGAKKYTFSFDYYGPSMSYLYFPYKLVKTGDSEKVGLQYTLNGNKNPVVITFGSGE…
NC95	533448	534909	-	44	8	TAAATTATTTCTGAATCAACTGTAAAAACGAACGAAACCCCTTGTTTTTC	GAAGAAGAAGAAGAAGAAGAAGAA	GTTCTTAGGAGTTCTGGGGTTTTCGTTTGGTCTGATCGGCGAAAATAAAC	VKRKNILKFVSLLGIGSFVMLAAASCTSATTPTPNPELKPTPKPEPKPEPMPNPPSGGMNGGDTNPSNGQGMNNAAQQLTAAKTALTTLINGETANLALYEDYAKIKNELTAAYETAKAVSAETGATLNEVNEAKSSLDATIKKAASAKNDFDSKNQSLITAYNALKATVNMETQTLEPLSADKYSGIRNSLTSLYDAAKAIIKKTLDPIDGAALVVGNVIMANSNITTATDSAKLSKEKENADMFGDGFVKQALNSQHLTADTTVTQGDTQAVPQQQPGNYSFVGYSVDVTSGSNGMMLPNWNFAQRKIRLNSNGGRTTPVTEAEKNSTPLTDVSWIYSLTSGGAKKYTFSFDYYGPSMSYLYFPYKLVKTGDSEKVGLQYTLNGNKNPVVITFGSGE…
NC96	562609	564070	-	44	11	TAAATTATTTCTGAATCAACTGTAAAAACGAACGAAACCCCTTGTTTTTC	GAAGAAGAAGAAGAAGAAGAAGAAGAAGAAGAA	GTTCTTAGGAGTTCTGGGGTTTTCGTTTGGTCTGATCGGCGAAAATAAAC	VKRKNILKFVSLLGIGSFVMLAAASCTSATTPTPNPELKPTPKPEPKPEPMPNPPSGGMNGGDTNPSNGQGMNNAAQQLTAAKTALTTLINGETANLALYEDYAKIKNELTAAYETAKAVSAETGATLNEVNEAKSSLDATIKKAASAKNDFDSKNQSLITAYNALKATVNMETQTLEPLSADKYSGIRNSLTSLYDAAKAIIKKTLDPIDGAALVVGNVIMANSNITTATDSAKLSKEKENADMFGDGFVKQALNSQHLTADTTVTQGDTQAVPQQQPGNYSFVGYSVDVTSGSNGMMLPNWNFAQRKIRLNSNGGRTTPVTEAEKNSTPLTDVSWIYSLTSGGAKKYTFSFDYYGPSMSYLYFPYKLVKTGDSEKVGLQYTLNGNKNPVVITFGSGE…
NY01	538634	540095	-	44	7	TAAATTATTTCTGAATCAACTGTAAAAACGAACGAAACCCCTTGTTTTTC	GAAGAAGAAGAAGAAGAAGAA	GTTCTTAGGAGTTCTGGGGTTTTCGTTTGGTCTGATCGGCGAAAATAAAC	VKRKNILKFVSLLGIGSFVMLAAASCTSATTPTPNPELKPTPKPEPKPEPMPNPPSGGMNGGDTNPSNGQGMNNAAQQLTAAKTALTTLINGETANLALYEDYAKIKNELTAAYETAKAVSAETGATLNEVNEAKSSLDATIKKAASAKNDFDSKNQSLITAYNALKATVNMETQTLEPLSADKYSGIRNSLTSLYDAAKAIIKKTLDPIDGAALVVGNVIMANSNITTATDSAKLSKEKENADMFGDGFVKQALNSQHLTADTTVTQGDTQAVPQQQPGNYSFVGYSVDVTSGSNGMMLPNWNFAQRKIRLNSNGGRTTPVTEAEKNSTPLTDVSWIYSLTSGGAKKYTFSFDYYGPSMSYLYFPYKLVKTGDSEKVGLQYTLNGNKNPVVITFGSGE…
S6	562996	565003	-	44	16	TAAATTATTTCTGAATCAACTGTAAAAACGAACGAAACCCCTTGTTTTTC	GAAGAAGAAGAAGAAGAAGAAGAAGAAGAAGAAGAAGAAGAAGAAGAA	GTTCTTAGGAGTTCTGGGGTTTTCGTTTGGTCTGATCGGCGAAAATAAAC	VKRKNILKFVSLLGIGSFVMLAAASCTTPVNPTPNPKPDPMPNPPSGGMNGGDTNPSNGQGMNNAAQQLTAAKTALTTLINGETANLALYEDYAKIKNELTAAYETAKAVSAETGATLNEVNEAKSSLDATIKKAASAKNDFDSKNQSLITAYNALKATVNMETQTLEPLSADKYSGIRNSLNSLYDAAKAIIKKTLDPIDGAALVVGNVIMANSNITTATDSAKLSKEKENADMFGDGFVKQALNSQHLTADTTVTQGDTQAVPQQQPGNYSFVGYSVDVTSGSNGMMLPNWNFAQRKIWLNSNGGRTTPVTEAEKNSTPLTDVSWIYSLTSGGAKKYTFSFDYYGPSMSYLYFPYKLVKTGDSEKVGLQYTLNGNKNPVVITFGSGENDSGPAPTVA…
VA94	544218	545679	-	44	7	TAAATTATTTCTGAATCAACTGTAAAAACGAACGAAACCCCTTGTTTTTC	GAAGAAGAAGAAGAAGAAGAA	GTTCTTAGGAGTTCTGGGGTTTTCGTTTGGTCTGATCGGCGAAAATAAAC	VKRKNILKFVSLLGIGSFVMLAAASCTSATTPTPNPELKPTPKPEPKPEPMPNPPSGGMNGGDTNPSNGQGMNNAAQQLTAAKTALTTLINGETANLALYEDYAKIKNELTAAYETAKAVSAETGATLNEVNEAKSSLDATIKKAASAKNDFDSKNQSLITAYNALKATVNMETQTLEPLSADKYSGIRNSLTSLYDAAKAIIKKTLDPIDGAALVVGNVIMANSNITTATDSAKLSKEKENADMFGDGFVKQALNSQHLTADTTVTQGDTQAVPQQQPGNYSFVGYSVDVTSGSNGMMLPNWNFAQRKIRLNSNGGRTTPVTEAEKNSTPLTDVSWIYSLTSGGAKKYTFSFDYYGPSMSYLYFPYKLVKTGDSEKVGLQYTLNGNKNPVVITFGSGE…
W101	525147	526608	-	44	14	TAAATTATTTCTGAATCAACTGTAAAAACGAACGAAACCCCTTGTTTTTC	GAAGAAGAAGAAGAAGAAGAAGAAGAAGAAGAAGAAGAAGAA	GTTCTTAGGAGTTCTGGGGTTTTCGTTTGGTCTGATCGGCGAAAATAAAC	VKRKNILKFVSLLGIGSFVMLAAASCTSATTPTPNPELKPTPKPEPKPEPMPNPPSGGMNGGDTNPSNGQGMNNAAQQLTAAKTALTTLINGETANLALYEDYAKIKNELTAAYETAKAVSAETGATLNEVNEAKSSLDATIKKAASAKNDFDSKNQSLITAYNALKATVNMETQTLEPLSADKYSGIRNSLTSLYDAAKAIIKKTLDPIDGAALVVGNVIMANSNITTATDSAKLSKEKENADMFGDGFVKQALNSQHLTADTTVTQGDTQAVPQQQPGNYSFVGYSVDVTSGSNGMMLPNWNFAQRKIRLNSNGGRTTPVTEAEKNSTPLTDVSWIYSLTSGGAKKYTFSFDYYGPSMSYLYFPYKLVKTGDSEKVGLQYTLNGNKNPVVITFGSGE…
CA06	789960	792210	-	45	5	TAATCTGGTTATGGTTTAAGATATAAAAACTTACAAAACCTTTTATTTTC	GAAGAAGAAGAAGAA	GATCTTAGAAGTTCTTAAGTTTGGGTCCCGTCTGATCGGTGAAAATTAAG	VKRKNILKFVSLLGIGSFVMLAAASCTSATTPTPNPDPNPNPTPNPEPKPDPMPNPPGDGSGMSGGMNGANTNPGGGQGMMDSAAQELTAARTALTSLLASKNANVEMYFDYAKIKNDLTAAYTTAETASQNQAATLEQVKNATSTLQTAIAKAASDKKTFDDQNPELVKFYNEIQSSLSTKTTNLETLKQPQYNTILSNLTTLYEEADKIVNQTLVPASGTGPTKEVVQTVNTNLKDALNTLNQRKTNANNLFNGFEKNLLIKTSLTSGSNSQDVHSQPGNYSFVGFSVDVTNSSANNLPNWDYAQRMVWTTGDAPTRIPNNTNMDQSSSSPLSQVAWIYSLSNTGAKYTLDFNYYGPSTGYLYFPYKLVKDSDKNKVALQYSLNGAHAKEIKFKTAT…
MC06	534698	536942	-	45	4	TAATCTGGTTATGGTTTAAGATATAAAAACTTACAAAACCTTTTATTTTC	GAAGAAGAAGAA	GATCTTAGAAGTTCTTAAGTTTGGGTCCCGTCTGATCGGTGAAAATTAAG	VKRKNILKFVSLLGIGSFVMLAAASCTSATTPTPNPDPNPTPNPEPKPDPMPNPPGDGSGMSGGMNGANTNPGGGQGMMDSAAQELTAARTALTSLLASKNANVEMYFDYAKIKNDLTAAYTTAETASQNQAATLEQVKNATSTLQTAIAKAASDKKTFDDQNPELVKFYNEIQSSLSTKTTNLETLKQPQYNTILSNLTTLYEEADKIVNQTLVPASGTGPTKEVVQTVNTNLKDALNTLNQRKTNANNLFNGFEKNLLIKTSLTSGSNSQDVHSQPGNYSFVGFSVDVTNSSANNFPNWDYAQRMVWTTGDAPTRIPNNTNMDQSSSSPLSQVAWIYSLSNTGAKYTLDFNYYGPSTGYLYFPYKLVKDSDKNKVALQYSLNGAHAKEIKFKTATET…
MC06	765767	768017	-	45	4	TAATCTGGTTATGGTTTAAGATATAAAAACTTACAAAACCTTTTATTTTC	GAAGAAGAAGAA	GATCTTAGAAGTTCTTAAGTTTGGGTCCCGTCTGATCGGTGAAAATTAAG	VKRKNILKFVSLLGIGSFVMLAAASCTSATTPTPNPDPNPTPTPNPEPKPDPMPNPPGDGSGMSGGMNGANTNPGGGQGMMDSAAQELTAARTALTSLLASKNANVEMYFDYAKIKNDLTAAYTTAETASQNQAATLEQVKNATSTLQTAIAKAASDKKTFDDQNPELVKFYNEIQSSLSTKTTNLETLKQPQYNTILSNLTTLYEEADKIVNQTLVPASGTGPTKEVVQTVNTNLKDALNTLNQRKTNANNLFNGFEKNLLIKTSLTSGSNSQDVHSQPGNYSFVGFSVDVTNSSANNLPNWDYAQRMVWTTGDAPTRIPNNTNMDQSSSSPLSQVAWIYSLSNTGAKYTLDFNYYGPSTGYLYFPYKLVKDSDKNKVALQYSLNGAHAKEIKFKTAT…
NC08	760772	763028	-	45	4	TAATCTGGTTATGGTTTAAGATATAAAAACTTACAAAACCTTTTATTTTC	GAAGAAGAAGAA	GATCTTAGAAGTTCTTAAGTTTGGGTCCCGTCTGATCGGTGAAAATTAAG	VKRKNILKFVSLLGIGSFVMLAAASCTSATTPTPNPDPNPNPTPTPNPEPKPDPMPNPPGDGSGMSGGMNGANTNPGGGQGMMDSAAQELTAARTALTSLLASKNANVEMYFDYAKIKNDLTAAYTTAETASQNQAATLEQVKNATSTLQTAIAKAASDKKTFDDQNPELVKFYNEIQSSLSTKTTNLETLKQPQYNTILSNLTTLYEEADKIVNQTLVPASGTGPTKEVVQTVNTNLKDALNTLNQRKTNANNLFNGFEKNLLIKTSLTSGSNSQDVHSQPGNYSFVGFSVDVTNSSANNLPNWDYAQRMVWTTGDAPTRIPNNTNMDQSSSSPLSQVAWIYSLSNTGAKYTLDFNYYGPSTGYLYFPYKLVKDSDKNKVALQYSLNGAHAKEIKFKT…
NC96	799285	801535	-	45	4	TAATCTGGTTATGGTTTAAGATATAAAAACTTACAAAACCTTTTATTTTC	GAAGAAGAAGAA	GATCTTAGAAGTTCTTAAGTTTGGGTCCCGTCTGATCGGTGAAAATTAAG	VKRKNILKFVSLLGIGSFVMLAAASCTSATTPTPNPDPNPNPTPNPEPKPDPMPNPPGDGSGMSGGMNGANTNPGGGQGMMDSAAQELTAARTALTSLLASKNANVEMYFDYAKIKNDLTAAYTTAETASQNQAATLEQVKNATSTLQTAIAKAASDKKTFDDQNPELVKFYNEIQSSLSTKTTNLETLKQPQYNTILSNLTTLYEEADKIVNQTLVPASGTGPTKEVVQTVNTNLKDALNTLNQRKTNANNLFNGFEKNLLIKTSLTSGSNSQDVHSQPGNYSFVGFSVDVTNSSANNLPNWDYAQRMVWTTGDAPTRIPNNTNMDQSSSSPLSQVAWIYSLSNTGAKYTLDFNYYGPSTGYLYFPYKLVKDSDKNKVALQYSLNGAHAKEIKFKTAT…
NY01	778152	780420	-	45	4	TAATCTGGTTATGGTTTAAGATATAAAAACTTACAAAACCTTTTATTTTC	GAAGAAGAAGAA	GATCTTAGAAGTTCTTAAGTTTGGGTCCCGTCTGATCGGTGAAAATTAAG	VKRKNILKFVSLLGIGSFVMLAAASCTSATTPTPNPDPNPNPNPNPNPTPNPEPKPDPMPNPPGDGSGMSGGMNGANTNPGGGQGMMDSAAQELTAARTALTSLLASKNANVEMYFDYAKIKNDLTAAYTTAKTASQNQAATLEQVKNATSTLQTAIAKAASDKKTFDDQNPELVKFYNEIQSSLSTKTTNLETLKQPQYNTILSNLTTLYEEADKIVNQTLVPASGTGPTKEVVQTVNTNLKDALNTLNQRKTNANNLFNGFEKNLLIKTSLTSGSNSQDVHSQPGNYSFVGFSVDVTNSSANNLPNWDYAQRMVWTTGDAPTRIPNNTNMDQSSSSPLSQVAWIYSLSNTGAKYTLDFNYYGPSTGYLYFPYKLVKDSDKNKVALQYSLNGAHAKEI…
VA94	777163	779413	-	45	4	TAATCTGGTTATGGTTTAAGATATAAAAACTTACAAAACCTTTTATTTTC	GAAGAAGAAGAA	GATCTTAGAAGTTCTTAAGTTTGGGTCCCGTCTGATCGGTGAAAATTAAG	VKRKNILKFVSLLGIGSFVMLAAASCTSATTPTPNPDPNPNPTPNPEPKPDPMPNPPGDGSGMSGGMNGANTNPGGGQGMMDSAAQELTAARTALTSLLASKNANVEMYFDYAKIKNDLTAAYTTAETASQNQAATLEQVKNATSTLQTAIAKAASDKKTFDDQNPELVKFYNEIQSSLSTKTTNLETLKQPQYNTILSNLTTLYEEADKIVNQTLVPASGTGPTKEVVQTVNTNLKDALNTLNQRKTNANNLFNGFEKNLLIKTSLTSGSNSQDVHSQPGNYSFVGFSVDVTNSSANNLPNWDYAQRMVWTTGDAPTRIPNNTNMDQSSSSPLSQVAWIYSLSNTGAKYTLDFNYYGPSTGYLYFPYKLVKDSDKNKVALQYSLNGAHAKEIKFKTAT…
W101	753035	755309	-	45	5	TAATCTGGTTATGGTTTAAGATATAAAAACTTACAAAACCTTTTATTTTC	GAAGAAGAAGAAGAA	GATCTTAGAAGTTCTTAAGTTTGGGTCCCGTCTGATCGGTGAAAATTAAG	VKRKNILKFVSLLGIGSFVMLAAASCTSATTPTPNPDPNPNPNPNPNPTPTPNPEPKPDPMPNPPGDGSGMSGGMNGANTNPGGGQGMMDSAAQELTAARTALTSLLASKNANVEMYFDYAKIKNDLTAAYTTAETASQNQAATLEQVKNATSTLQTAIAKAASDKKTFDDQNPELVKFYNEIQSSLSTKTTNLETLKQPQYNTILSNLTTLYEEADKIVNQTLVPASGTGPTKEVVQTVNTNLKDALNTLNQRKTNANNLFNGFEKNLLIKTSLTSGSNSQDVHSQPGNYSFVGFSVDVTNSSANNLPNWDYAQRMVWTTGDAPTRIPNNTNMDQSSSSPLSQVAWIYSLSNTGAKYTLDFNYYGPSTGYLYFPYKLVKDSDKNKVALQYSLNGAHAK…
CA06	580713	582789	-	46	6	TAAGTAGTTGTAAGTACGATAAAAACAAGGTAAAACCTTTTGTTTTCCAA	GAAGAAGAAGAAGAAGAA	GTTCTTAGAAGTTTTGGGGCTTTCGGCTGAACTAATCAGCGAAAATTAAG	VKRKNILKFVSLLGIGSFVMLAAASCTSATTPTPNPEPKPTPNPEPKPDPMPNPPSGGMNGGNTNPGNGGRMDNAAQQLVAARTALTTLINSRTQNTELYVDYAKIQDTLVKAYDAAKVVLDNTASTTQNINQAKTTLETAINAAAKARRDFDAANGPLVTAYNALKETLKNEETVLSGLTDSNFATIKTKLTALYQSGKDIVTKTLDPIMGTAIDLSAVTQANTNISNAVLKLDGWKTNANTLATSFVKEVLVKNKLTGIDTTNNQEQPGNYSFVGYSVDVTTGSNNARPNWSFAQRKVWSDNTVILSQPQPAEGENQQSAPDVSWIYNLTGMGAKYSLTFNYYGPSTGFLYFPYKLVNISDSDKVALEYKLNEATAKTIDFAPSQTLPVASDATREN…
CA06	812230	814282	-	46	4	TATTATTCACTGGTATTAAGTTGAAAAATAAGTAAAAGCCTTTGTTTTTC	GAAGAAGAAGAA	GATTTTAGAAGTTCTTAAGTTTGGGCCCCGTCTGATCAGCAAAAATAAAC	VKRKNILKFVSLLGIGSFVMLAAASCTSATTPTPNPEPKPDPMPNPPSGGMNGGNTNPGNGGRMDNAAQQLVAARTALTTLINSRTQNTELYVDYAKIQDTLVKAYDAAKVVLDNTASTTQNINQAKTTLETAINAAAKARRDFDAANGPLVTAYNALKETLKNEETVLSGLTDSNFATIKTKLTALYQSGKDIVTKTLDPIMGTAIDLSAVTQANTNISNAVLKLDGWKTNANTLATSFVKEVLVKNKLTGIDTTNNQEQPGNYSFVGYSVDVTTGSNNARPNWSFAQRKVWSDNTVILSQPQPAEGENQQSAPDVSWIYNLTGMGAKYSLTFNYYGPSTGFLYFPYKLVNISDSDKVALEYKLNEATAKTIDFAPSQTLPVASDATRENNPSTSAPA…
F	805439	807527	-	46	4	TATTATTCACTGGTATTAAGTTGAAAAATAAGTAAAAGCCTTTGTTTTTC	GAAGAAGAAGAA	GATCTTAGAAGTTCTTAAGTTTGGGCCCCGTCTGATCGGTGAAAATTAAG	VKRKNILKFVSLLGIGSFVMLAAASCTSATTPTPNPEPKPNPEPNPNPEPKPDPMPNPPSGGMNDKNTNPGNGGRMDNAAQQLAAARTALTTLINSRTQNTELYVDYAKIQDTLVKAYDAAKVVLDNTASTTQNINQAKTTLETAINAAVKARRDFDAANGPLVTAYNALKETLKNEETVLSDLTDSNFATIKTNLTALYQSGKDIVTKTLDPIMGTAIDLSAVTQANTNISNAVLKLDGWKTNANTLATSFVKEVLIKNKLTGIDTTNNQEQPGNYSFVGYSVDVTTGSNNARPNWSFAQRKVWSDNTVILSQPQPAEGENQQSAPDVSWIYNLTGMGAKYSLTFNYYGPSTGFLYFPYKLVNSSDSDKVALEYKLNESTVKTIDFAPSQTSPVPSDA…
MC06	787716	789792	-	46	4	TATTATTCACTGGTATTAAGTTGAAAAATAAGTAAAAGCCTTTGTTTTTC	GAAGAAGAAGAA	GATTTTAGAAGTTCTTAAGTTTGGGCCCCGTCTGATCAGCGAAAATAAAC	VKRKNILKFVSLLGIGSFVMLAAASCTSATTPTPNPEPKPTPNPEPKPDPMPNPPSGGMNGGNTNPGNGGRMDNAAQQLVAARTALTTLINSRTQNTELYVDYAKIQDTLVKAYDAAKVVLDNTASTTQNINQAKTTLETAINAAAKARRDFDAANGPLVTAYNALKETLKNEETVLSGLTDSNFATIKTKLTALYQSGKDIVTKTLDPIMGTAIDLSAVTQANTNISNAVLKLDGWKTNANTLATSFVKEVLVKNKLTGIDTTNNQEQPGNYSFVGYSVDVTTGSNNARPNWSFAQRKVWSDNTVILSQPQPAEGENQQSAPDVSWIYNLTGMGAKYSLTFNYYGPSTGFLYFPYKLVNISDSDKVALEYKLNEATAKTIDFAPSQTLPVASDATREN…
NC95	557218	559294	-	46	11	TAAGTAGTTGTAAGTACGATAAAAACAAGGTAAAACCTTTTGTTTTCCAA	GAAGAAGAAGAAGAAGAAGAAGAAGAAGAAGAA	GTTCTTAGAAGTTTTGGGGCTTTCGGCTGAACTAATCAGCGAAAATTAAG	VKRKNILKFVSLLGIGSFVMLAAASCSSATTPTPNPEPKPTPNPEPKPDPMPNPPSGGMNGGNTNPGNGGRMDNAAQQLVAARTALTTLINSKTQNTELYVDYAKIQDTLVKAYDAAKVVLDNTASTTQNINQAKTTLETAINAAAKARRDFDAANGPLVTAYNALKETLKNEETVLSGLTDSNFATIKTKLTALYQSGKDIVTKTLDPIMGTAIDLSAVTQANTNISNAVLKLDGWKTNANTLATSFVKEVLVKNKLTGIDTTNNQEQPGNYSFVGYSVDVTTGSNNARPNWSFAQRKVWSDNTVILSQPQPAEGENQQSAPDVSWIYNLTGMGAKYSLTFNYYGPSTGFLYFPYKLVNISDSDKVALEYKLNEATAKTIDFAPSQTLPVASDATREN…
NC95	788650	790726	-	46	4	TATTATTCACTGGTATTAAGTTGAAAAATAAGTAAAAGCCTTTGTTTTTC	GAAGAAGAAGAA	GATTTTAGAAGTTCTTAAGTTTGGGCCCCGTCTGATCAGCGAAAATAAAC	VKRKNILKFVSLLGIGSFVMLAAASCTSATTPTPNPEPKPTPNPEPKPDPMPNPPSGGMNGGNTNPGNGGRMDNAAQQLVAARTALTTLINSRTQNTELYVDYAKIQDTLVKAYDAAKVVLDNTASTTQNINQAKTTLETAINAAAKARRDFDAANGPLVTAYNALKETLKNEETVLSGLTDSNFATIKTKLTALYQSGKDIVTKTLDPIMGTAIDLSAVTQANTNISNAVLKLDGWKTNANTLATSFVKEVLVKNKLTGIDTTNNQEQPGNYSFVGYSVDVTTGSNNARPNWSFAQRKVWSDNTVILSQPQPAEGENQQSAPDVSWIYNLTGMGAKYSLTFNYYGPSTGFLYFPYKLVNISDSDKVALEYKLNEATAKTIDFAPSQTLPVASDATREN…
NC96	586400	588476	-	46	10	TAAGTAGTTGTAAGTACGATAAAAACAAGGTAAAACCTTTTGTTTTCCAA	GAAGAAGAAGAAGAAGAAGAAGAAGAAGAA	GTTCTTAGAAGTTTTGGGGCTTTCGGCTGAACTAATCAGCGAAAATTAAG	VKRKNILKFVSLLGIGSFVMLAAASCTSATTPTPNPEPKPTPNPEPKPDPMPNPPSGGMNGGNTNPGNGGRMDNAAQQLVAARTALTTLINSRTQNTELYVDYAKIQDTLVKAYDAAKVVLDNTASTTQNINQAKTTLETAINAAAKARRDFDAANGPLVTAYNALKETLKNEETVLSGLTDSNFATIKTKLTALYQSGKDIVTKTLDPIMGTAIDLSAVTQANTNISNAVLKLDGWKTNANTLATSFVKEVLVKNKLTGIDTTNNQEQPGNYSFVGYSVDVTTGSNNARPNWSFAQRKVWSDNTVILSQPQPAEGENQQSAPDVSWIYNLTGMGAKYSLTFNYYGPSTGFLYFPYKLVNISDSDKVALEYKLNEATAKTIDFAPSQTLPVASDATREN…
NC96	821530	823606	-	46	4	TATTATTCACTGGTATTAAGTTGAAAAATAAGTAAAAGCCTTTGTTTTTC	GAAGAAGAAGAA	GATTTTAGAAGTTCTTAAGTTTGGGCCCCGTCTGATCAGCGAAAATAAAC	VKRKNILKFVSLLGIGSFVMLAAASCTSATTPTPNPEPKPTPNPEPKPDPMPNPPSGGMNGGNTNPGNGGRMDNAAQQLVAARTALTTLINSRTQNTELYVDYAKIQDTLVKAYDAAKVVLDNTASTTQNINQAKTTLETAINAAAKARRDFDAANGPLVTAYNALKETLKNEETVLSGLTDSNFATIKTKLTALYQSGKDIVTKTLDPIMGTAIDLSAVTQANTNISNAVLKLDGWKTNANTLATSFVKEVLVKNKLTGIDTTNNQEQPGNYSFVGYSVDVTTGSNNARPNWSFAQRKVWSDNTVILSQPQPAEGENQQSAPDVSWIYNLTGMGAKYSLTFNYYGPSTGFLYFPYKLVNISDSDKVALEYKLNEATAKTIDFAPSQTLPVASDATREN…
NY01	569002	571054	-	46	15	TAAGTAGTTGTAAGTACGATAAAAACAAGGTAAAACCTTTTGTTTTCCAA	GAAGAAGAAGAAGAAGAAGAAGAAGAAGAAGAAGAAGAAGAAGAA	GTTCTTAGAAGTTTTGGGGCTTTCGGCTGAACTAATCAGCGAAAATTAAG	VKRKNILKFVSLLGIGSFVMLAAASCTSATTPTPNPEPKPDPMPNPPSGGMNGGNTNPGNGGRMDNAAQQLVAARTALTTLINSKTQNTELYVDYAKIQDTLVKAYDAAKVVLDNTASTTQNINQAKTTLETAINAAAKARRDFDAANGPLVTAYNALKETLKNEETVLSGLTDSNFATIKTKLTALYQSGKDIVTKTLDPIMGTAIDLSAVTQANTNISNAVLKLDGWKTNANTLATSFVKEVLVKNKLTGIDTTNNQEQPGNYSFVGYSVDVTTGSNNARPNWSFAQRKVWSDNTVILSQPQPAEGENQQSAPDVSWIYNLTGMGAKYSLTFNYYGPSTGFLYFPYKLVNISDSDKVALEYKLNEATAKTIDFAPSQTLPVASDATRENNPSTSAPA…
NY01	800390	802466	-	46	4	TATTATTCACTGGTATTAAGTTGAAAAATAAGTAAAAGCCTTTGTTTTTC	GAAGAAGAAGAA	GATTTTAGAAGTTCTTAAGTTTGGGCCCCGTCTGATCAGCGAAAATAAAC	VKRKNILKFVSLLGIGSFVMLAAASCTSATTPTPNPEPKPTPNPEPKPDPMPNPPSGGMNGGNTNPGNGGRMDNAAQQLVAARTALTTLINSRTQNTELYVDYAKIQDTLVKAYDAAKVVLDNTASTTQNINQAKTTLETAINAAAKARRDFDAANGPLVTAYNALKETLKNEETVLSGLTDSNFATIKTKLTALYQSGKDIVTKTLDPIMGTAIDLSAVTQANTNISNAVLKLDGWKTNANTLATSFVKEVLVKNKLTGIDTTNNQEQPGNYSFVGYSVDVTTGSNNARPNWSFAQRKVWSDNTVILSQPQPAEGENQQSAPDVSWIYNLTGMGAKYSLTFNYYGPSTGFLYFPYKLVNISDSDKVALEYKLNEATAKTIDFAPSQTLPVASDATREN…
S6	259528	261616	+	46	9	ATTGAGTTGTTGTATTTAATATATAAAATAGCTAAAATCCTTTAAAAATC	GAAGAAGAAGAAGAAGAAGAAGAAGAA	GTTCTTAGAAGTTCTGTGGTCTGGGGTTGGTTTGATCAGCGAAAATAAAC	VKRKNILKFVSLLGIGSFVMLAAASCTSATTPTPNPEPKPNPEPNPNPEPKPDPMPNPPSGGMNDKNTNPGNGGRMDNAAQQLAAARTALTTLINSRTQNTELYVDYAKIQDTLVKAYDAAKVVLDNTASTTQNINQAKTTLETAINAAVKARRDFDAANGPLVTAYNALKETLKNEETVLSDLTDSNFATIKTNLTALYQSGKDIVTKTLDPIMGTAIDLSAVTQANTNISNAVLKLDGWKTNANTLATSFVKEVLIKNKLTGIDTTNNQEQPGNYSFVGYSVDVTTGSNNARPNWSFAQRKVWSDNTVILSQPQPAEGENQQSAPDVSWIYNLTGMGAKYSLTFNYYGPSTGFLYFPYKLVNSSDSDKVALEYKLNESTVKTIDFAPSQTSPVPSDA…
VA94	568030	570106	-	46	9	TAAGTAGTTGTAAGTACGATAAAAACAAGGTAAAACCTTTTGTTTTCCAA	GAAGAAGAAGAAGAAGAAGAAGAAGAA	GTTCTTAGAAGTTTTGGGGCTTTCGGCTGAACTAATCAGCGAAAATTAAG	VKRKNILKFVSLLGIGSFVMLAAASCTSATTPTPNPEPKPTPNPEPKPDPMPNPPSGGMNGGNTNPGNGGRMDNAAQQLVAARTALTTLINSRTQNTELYVDYAKIQDTLVKAYDAAKVVLDNTASTTQNINQAKTTLETAINAAAKARRDFDAANGPLVTAYNALKETLKNEETVLSGLTDSNFATIKTKLTALYQSGKDIVTKTLDPIMGTAIDLSAVTQANTNISNAVLKLDGWKTNANTLATSFVKEVLVKNKLTGIDTTNNQEQPGNYSFVGYSVDVTTGSNNARPNWSFAQRKVWSDNTVILSQPQPAEGENQQSAPDVSWIYNLTGMGAKYSLTFNYYGPSTGFLYFPYKLVNISDSDKVALEYKLNEATAKTIDFAPSQTLPVASDATREN…
VA94	799367	801443	-	46	4	TATTATTCACTGGTATTAAGTTGAAAAATAAGTAAAAGCCTTTGTTTTTC	GAAGAAGAAGAA	GATTTTAGAAGTTCTTAAGTTTGGGCCCCGTCTGATCAGCGAAAATAAAC	VKRKNILKFVSLLGIGSFVMLAAASCTSATTPTPNPEPKPTPNPEPKPDPMPNPPSGGMNGGNTNPGNGGRMDNAAQQLVAARTALTTLINSRTQNTELYVDYAKIQDTLVKAYDAAKVVLDNTASTTQNINQAKTTLETAINAAAKARRDFDAANGPLVTAYNALKETLKNEETVLSGLTDSNFATIKTKLTALYQSGKDIVTKTLDPIMGTAIDLSAVTQANTNISNAVLKLDGWKTNANTLATSFVKEVLVKNKLTGIDTTNNQEQPGNYSFVGYSVDVTTGSNNARPNWSFAQRKVWSDNTVILSQPQPAEGENQQSAPDVSWIYNLTGMGAKYSLTFNYYGPSTGFLYFPYKLVNISDSDKVALEYKLNEATAKTIDFAPSQTLPVASDATREN…
W101	774540	776592	-	46	4	TATTATTCACTGGTATTAAGTTGAAAAATAAGTAAAAGCCTTTGTTTTTC	GAAGAAGAAGAA	GATTTTAGAAGTTCTTAAGTTTGGGCCCCGTCTGATCAGCGAAAATAAAC	VKRKNILKFVSLLGIGSFVMLAAASCTSATTPTPNPEPKPDPMPNPPSGGMNGGNTNPGNGGRMDNAAQQLVAARTALTTLINSRTQNTELYVDYAKIQDTLVKAYDAAKVVLDNTASTTQNINQAKTTLETAINAAAKARRDFDAANGPLVTAYNALKETLKNEETVLSGLTDSNFATIKTKLTALYQSGKDIVTKTLDPIMGTAIDLSAVTQANTNISNAVLKLDGWKTNANTLATSFVKEVLVKNKLTGIDTTNNQEQPGNYSFVGYSVDVTTGSNNARPNWSFAQRKVWSDNTVILSQPQPAEGENQQSAPDVSWIYNLTGMGAKYSLTFNYYGPSTGFLYFPYKLVNISDSDKVALEYKLNEATAKTIDFAPSQTLPVASDATRENNPSTSAPA…
CA06	787227	789636	-	47	10	GAATTTAATTGTGGATTAACTACAAAAACATATAAAAACCTTAAGTTTTC	GAAGAAGAAGAAGAAGAAGAAGAAGAAGAA	GTTCTTAGAAGTTTAGGAGTTAGCGACTACTCTGATCAGCGAAAATAAAT	VKRKNILKFVSLLGIGSFVMLAAASCTSATTTTTTTTTTTTPTPTPTPTPTPTPTPTPTPTPTPTPTPTPTPTPTPTPTPTPTPTPTPTPTPTPTPTPTPTPTPTPTPTPTPTPTPTPTPTPTPTPTPTPTPTPTPNPEPKPDPIPNPPSRGMNGGDTNPGDGQGMMNATNQELVNAKKALSDLIGGESKTVELYADYAKIKADLTSAYTVAKTTSDSSTSTLDQVKTATSKLQTAIDKAASDKQKFEQDHKDLLMPYSELKTTLSQKNATVVLLNQPKYSAILNKINSIYAQGEEVVIRTLNPVSGAIPTAASITKVNDEINKAISENQLKPKKDNADAFANYQFFKLDKAKITGTSTNNTAQPQNYSFVGYSVGVTGMQSGQTTIPNWNFAQRIVWS…
F	258414	260535	+	47	12	AAAACATTTCTCTGAATTTGTTATAAAAATTAGTGAAACCCTTAATTTTC	GAAGAAGAAGAAGAAGAAGAAGAAGAAGAAGAAGAA	GTTCTTAGAAGTTTAGGAGTTAGCGACTACTCTGATCAGCGAAAATAAAT	VKRKNILKFVSLLGIGSFVMLAAASCNSATTPTPTPNPTPNPEPKPDPIPNPPSRGMNGGDTNPGDGQGMMNATNQELVNAKKALSDLIGGESKTVELYADYAKIKADLTSAYTVAKTTSDSSTSTLDQVKTATSKLQTAIDKAASDKQKFEQDHKDLLMPYSELKTTLSQKNATVVLLNQPKYSAILNKINSIYAQGEEVVIRTLNPVSGAIPTAASITKVNDEINKAISENQLKPKKDNADAFANYQFFKLDKAKITGTSTNNTAQPQNYSFVGYSVGVTGMQSGQTTIPNWNFAQRIVWSSGAPRAPLASQTETPPMSAPQGTEPAQQQGDSSSKQASETQEVSPTPAAEGQAQQADTEQPATSQGTPLTDVSWIYSLSGTDVKYTFSFNYFGPSM…
MC06	763220	765461	-	47	4	GAATTTAATTGTGGATTAACTACAAAAACATATAAAAACCTTAAGTTTTC	GAAGAAGAAGAA	GTTCTTAGAAGTTTAGGAGTTAGCGACTACTCTGATCAGCGAAAATAAAT	VKRKNILKFVSLLGIGSFVMLAAASCTSATTTTTTTTTTTTTTTTTTTTTTTTTTTTTTTTTTTTTTTTTTTTPTPTPTPNPEPKPDPIPNPPSRGMNGGDTNPGDGQGMMNATNQELVNAKKALSDLIGGESKTVELYADYAKIKADLTSAYTVAKTTSDSSTSTLDQVKTATSKLQTAIDKAASDKQKFEQDHKDLLMPYSELKTTLSQKNATVVLLNQPKYSAILNKINSIYAQGEEVVIRTLNPVSGAIPTAASITKVNDEINKAISENQLKPKKDNADAFANYQFFKLDKAKITGTSTNNTAQPQNYSFVGYSVGVTGMQSGQTTIPNWNFAQRIVWSSGAPRAPLASQTETPPMSAPQGTEPAQQQGDSSSKQASETQEVSPTPAAEGQAQQA…
NC08	758243	760466	-	47	4	GAATTTAATTGTGGATTAACTACAAAAACATATAAAAACCTTAAGTTTTC	GAAGAAGAAGAA	GTTCTTAGAAGTTTAGGAGTTAGCGACTACTCTGATCAGCGAAAATAAAT	VKRKNILKFVSLLGIGSFVMLAAASCTSATTPTPTPTPTPTPTPTPTPTPTPTPTPTPTPTPTPTPTPTPTPTPNPEPKPDPIPNPPSRGMNGGDTNPGDGQGMMNATNQELVNAKKALSDLIGGESKTVELYADYAKIKADLTSAYTVAKTTSDSSTSTLDQVKTATSKLQTAIDKAASDKQKFEQDHKDLLMPYSELKTTLSQKNATVVLLNQPKYSAILNKINSIYAQGEEVVIRTLNPVSGAIPTAASITKVNDEINKAISENQLKPKKDNADAFANYQFFKLDKAKITGTSTNNTAQPQNYSFVGYSVGVTGMQSGQTTIPNWNFAQRIVWSSGAPRAPLASQTETPPMSAPQGTEPAQQQGDSSSKQASETQEVSPTPAAEGQAQQAYTEQPA…
NC95	763720	766105	-	47	4	GAATTTAATTGTGGATTAACTACAAAAACATATAAAAACCTTAAGTTTTC	GAAGAAGAAGAA	GTTCTTAGAAGTTTAGGAGTTAGCGACTACTCTGATCAGCGAAAATAAAT	VKRKNILKFVSLLGIGSFVMLAAASCTSATTTTTTTTTTTTTTTTTTTTTTTTPTPTPTPTPTPTPTPTPTPTPTPTPTPTPTPTPTPTPTPTPTPTPTPTPTPTPTPTPTPTPTPTPTPTPTPTPTPNPEPKPDPIPNPPSRGMNGGDTNPGDGQGMMNATNQELVNAKKALSDLIGGESKTVELYADYAKIKADLTSAYTVAKTTSDSSTSTLDQVKTATSKLQTAIDKAASDKQKFEQDHKDLLMPYSELKTTLSQKNATVVLLNQPKYSAILNKINSIYAQGEEVVIRTLNPVSGAIPTAASITKVNDEINKAISENQLKPKKDNADAFANYQFFKLDKAKITGTSTNNTAQPQNYSFVGYSVGVTGMQSGQTTIPNWNFAQRIVWSSGAPRAPL…
NC96	796558	798979	-	47	4	GAATTTAATTGTGGATTAACTACAAAAACATATAAAAACCTTAAGTTTTC	GAAGAAGAAGAA	GTTCTTAGAAGTTTAGGAGTTAGCGACTACTCTGATCAGCGAAAATAAAT	VKRKNILKFVSLLGIGSFVMLAAASCTSATTTTTTTTTTTTTTTTTTTTTTTTTTPTPTPTPTPTPTPTPTPTPTPTPTPTPTPTPTPTPTPTPTPTPTPTPTPTPTPTPTPTPTPTPTPTPTPTPTPTPTPTPTPTPTPNPEPKPDPIPNPPSRGMNGGDTNPGDGQGMMNATNQELVNAKKALSDLIGGESKTVELYADYAKIKADLTSAYTVAKTTSDSSTSTLDQVKTATSKLQTAIDKAASDKQKFEQDHKDLLMPYSELKTTLSQKNATVVLLNQPKYSAILNKINSIYAQGEEVVIRTLNPVSGAIPTAASITKVNDEINKAISENQLKPKKDNADAFANYQFFKLDKAKITGTSTNNTAQPQNYSFVGYSVGVTGMQSGQTTIPNWNFAQR…
NY01	775551	777846	-	47	4	GAATTTAATTGTGGATTAACTACAAAAACATATAAAAACCTTAAGTTTTC	GAAGAAGAAGAA	GTTCTTAGAAGTTTAGGAGTTAGCGACTACTCTGATCAGCGAAAATAAAT	VKRKNILKFVSLLGIGSFVMLAAASCTSATTTTTTTTTTTTTTPTPTPTPTPTPTPTPTPTPTPTPTPTPTPTPTPTPTPTPTPTPTPTPTPTPTPTPNPEPKPDPIPNPPSRGMNGGDTNPGDGQGMMNATNQELVNAKKALSDLIGGESKTVELYADYAKIKADLTSAYTVAKTTSDSSTSTLDQVKTATSKLQTAIDKAASDKQKFEQDHKDLLMPYSELKTTLSQKNATVVLLNQPKYSAILNKINSIYAQGEEVVIRTLNPVSGAIPTAASITKVNDEINKAISENQLKPKKDNADAFANYQFFKLDKAKITGTSTNNTAQPQNYSFVGYSVGVTGMQSGQTTIPNWNFAQRIVWSSGAPRAPLASQTETPPMSAPQGTEPAQQQGDSSSKQAS…
S6	798710	800825	-	47	11	ACTATTTTTTTTGAATTAATGACAAAAAACGCTAAAACCTTTTATTTCTA	GAAGAAGAAGAAGAAGAAGAAGAAGAAGAAGAA	GTTCTTAGAAGTTTAGAGGTTTGGGACTCGTCTGATAGACGAAAATAAAC	VKRKNILKFVSLLGIGSFVMLAATSCTSATAPTPNPTPNPEPKPDPMPNPPSGGMNDGNTNPGMDTAAQELASAKAALTTLTNRESEKVGLYVDYAKIKADLTSAYTVAKTTSDSSTSTLDQVKTATSKLQTAIDKAASDKQKFEQDHKDLLMPYSELKTTLSQKNATVVLLNQPKYSAILNKINSIYAQGEEVVIRTLDPVSGAIPTAASITKVNDEINKAISENQLKPKKDNADAFANYQFFKLDKTKIMGMSTNMMKQPQNYSFVGYSVGVTGMQSGQTTIPNWNFAQRIVWSSGAPRAPLASQTETPQAETPPMSAPQGVEPAQQQGDSSPKQASETQEVSPTPAAEVQAQQADTEQPATSQGTPLTDVSWIYSLSGTDVKYTFTFNYFGPSMAY…
VA94	774526	776857	-	47	4	GAATTTAATTGTGGATTAACTACAAAAACATATAAAAACCTTAAGTTTTC	GAAGAAGAAGAA	GTTCTTAGAAGTTTAGGAGTTAGCGACTACTCTGATCAGCGAAAATAAAT	VKRKNILKFVSLLGIGSFVMLAAASCTSATTTTTTTTTTTTTTTTTTTTTTTTTTTTPTPTPTPTPTPTPTPTPTPTPTPTPTPTPTPTPTPTPTPTPTPTPTPTPTPTPNPEPKPDPIPNPPSRGMNGGDTNPGDGQGMMNATNQELVNAKKALSDLIGGESKTVELYADYAKIKADLTSAYTVAKTTSDSSTSTLDQVKTATSKLQTAIDKAASDKQKFEQDHKDLLMPYSELKTTLSQKNATVVLLNQPKYSAILNKINSIYAQGEEVVIRTLNPVSGAIPTAASITKVNDEINKAISENQLKPKKDNADAFANYQFFKLDKAKITGTSTNNTAQPQNYSFVGYSVGVTGMQSGQTTIPNWNFAQRIVWSSGAPRAPLASQTETPPMSAPQGTEPA…
W101	750416	752723	-	47	6	GAATTTAATTGTGGATTAACTACAAAAACATATAAAAACCTTAAGTTTTC	GAAGAAGAAGAAGAAGAA	GTTCTTAGAAGTTTAGGAGTTAGCGACTACTCTGATCAGCGAAAATAAAT	VKRKNILKFVSLLGIGSFVMLAAASCTSATTTTTTTTTTTTTTTTPTPTPTPTPTPTPTPTPTPTPTPTPTPTPTPTPTPTPTPTPTPTPTPTPTPTPTPTPNPEPKPDPIPNPPSRGMNGGDTNPGDGQGMMNATNQELVNAKKALSDLIGGESKTVELYADYAKIKADLTSAYTVAKTTSDSSTSTLDQVKTATSKLQTAIDKAASDKQKFEQDHKDLLMPYSELKTTLSQKNATVVLLNQPKYSAILNKINSIYAQGEEVVIRTLNPVSGAIPTAASITKVNDEINKAISENQLKPKKDNADAFANYQFFKLDKAKITGTSTNNTAQPQNYSFVGYSVGVTGMQSGQTTIPNWNFAQRIVWSSGAPRAPLASQTETPPMSAPQGTEPAQQQGDSSS…
CA06	453786	455814	+	48	17	ATAAGTTGTGATGGTTTTAACTATAAAAACTGATAAAATCTTTTGTTTTC	GAAGAAGAAGAAGAAGAAGAAGAAGAAGAAGAAGAAGAAGAAGAAGAAGAA	GTTCTTAGAAGTTTAGAGGTTTGGGACTCGTCTGATCGACGAAAATAAAC	VKRKNILKFVSLLGIGSFVMLAAASCTTATTPTPNPESKPNPAPKPNPMPNPPSGGMNGGNTPTPNPNPPSGGMNGGDANPGNGRGTDNAAQQLADVKAELNTLISSQQAKVSLYEDYAKIQDTLTKAYAAAQAVLDKTDSSAQNLKDAKTTLETAISAADTAKTEFNKTHKALVTSYAELKTNLSKQDETLSPFAELQFQGIKNHLTALYTAGTAVVKMKLQSVDGMVLDATKVNNANKAIIDATNSKLLMDQKNNANDLGTMFVKQILSKSSVLTNENVAVEEHAQPVNYSFVGYSVDIHGTDNDTPPSWNYTKRTVFTVGGSLVENQNGENGNKPLTDVSWVYSLGASNKYSLKFSYFGPSTGYLYFPYKLVKADQAGKIGLEYSLNGGAKSALQF…
NC96	459197	461225	+	48	8	ATAAGTTGTGATGGTTTTAACTATAAAAACTGATAAAATCTTTTGTTTTC	GAAGAAGAAGAAGAAGAAGAAGAA	GTTCTTAGAAGTTTAGAGGTTTGGGACTCGTCTGATCGACGAAAATAAAC	VKRKNILKFVSLLGIGSFVMLAAASCTTATTPTPNPESKPNPAPKPNPMPNPPSGGMNGGNTPTPNPNPPSGGMNGGDANPGNGRGTDNAAQQLADVKAELNTLISSQQAKVSLYEDYAKIQDTLTKAYAAAQAVLDKTDSSAQNLKDAKTTLETAISAADTAKTEFNKTHKALVTSYAELKTNLSKQDETLSPFAELQFQGIKNHLTALYTAGTAVVKMKLQSVDGMVLDATKVNNANKAIIDATNSKLLMDQKNNANDLGTMFVKQILSKSSVLTNENVAVEEHAQPVNYSFVGYSVDIHGTDNDTPPSWNYTKRTVFTVGGSLVENQNGENGNKPLTDVSWVYSLGASNKYSLKFSYFGPSTGYLYFPYKLVKADQAGKIGLEYSLNGGAKSALQF…
NY01	552318	554346	-	48	9	ATAAGTTGTGATGGTTTTAACTATAAAAACTGATAAAATCTTTTGTTTTC	GAAGAAGAAGAAGAAGAAGAAGAAGAA	GTTCTTAGAAGTTTAGAGGTTTGGGACTCGTCTGATCGACGAAAATAAAC	VKRKNILKFVSLLGIGSFVMLAAASCTTATTPTPNPESKPNPAPKPNPMPNPPSGGMNGGNTPTPNPNPPSGGMNGGDANPGNGRGTDNAAQQLADVKAELNTLISSQQAKVSLYEDYAKIQDTLTKAYAAAQAVLDKTDSSAQNLKDAKTTLETAISAADTAKTEFNKTHKALVTSYAELKTNLSKQDETLSPFAELQFQGIKNHLTALYTAGTAVVKMKLQSVDGMVLDATKVNNANKAIIDATNSKLLMDQKNNANDLGTMFVKQILSKSSVLTNENVAVEEHAQPVNYSFVGYSVDIHGTDNDTPPSWNYTKRTVFTVGGSLVENQNGENGNKPLTDVSWVYSLGASNKYSLKFSYFGPSTGYLYFPYKLVKADQAGKIGLEYSLNGGAKSALQF…
W101	260641	262669	+	48	10	ATTGAGTTGTTGTATTTAATATATAAAATAGCTAAAATCCTTTAAAAATC	GAAGAAGAAGAAGAAGAAGAAGAAGAAGAA	GTTCTTAGAAGTTTAGGAGTTAGCGACTACTCTGATCGGCGAAAATAAAC	VKRKNILKFVSLLGIGSFVMLAAASCTTATTPTPNPESKPNPAPKPNPMPNPPSGGMNGGNTPTPNPNPPSGGMNGGDANPGNGRGTDNAAQQLADVKAELNTLISSQQAKVSLYEDYAKIQDTLTKAYAAAQAVLDKTDSSAQNLKDAKTTLETAISAADTAKTEFNKTHKALVTSYAELKTNLSKQDETLSPFAELQFQGIKNHLTALYTAGTAVVKMKLQSVDGMVLDATKVNNANKAIIDATNSKLLMDQKNNANDLGTMFVKQILSKSSVLTNENVAVEEHAQPVNYSFVGYSVDIHGTDNDTPPSWNYTKRTVFTVGGSLVENQNGENGNKPLTDVSWVYSLGASNKYSLKFSYFGPSTGYLYFPYKLVKADQAGKIGLEYSLNGGAKSALQF…
CA06	451405	453457	+	49	8	TAAATTATTTCTGAATTAACTGTAAAAACGAACTAAACCCTTTGTTTTTC	GAAGAAGAAGAAGAAGAAGAAGAA	GTTCTTAGGAGTTCGGGGGTTTTCGTTTGGTCTGATCAGCGAAAATAAAC	VKRKNILKFVSLLGIGSFAMLAAASCTSATTPTPNPTPNPTPNPTPNPEPKPDPMPNPPSGGDMNNPPNGGMNGGDTNPGNGGGMDNSAQQLAAAKTALTNLLNGQNEKVSLYADYAKIKNTLAAAYNTAKTASDNVDATLENLKSARMILQAAIDKAASDKELFDTNNRDLVNAYTQLKTALQTETATLQNLTQVKYSAIKDHVSNLYKIGNQITTKTLDPSSGETSGLEDVRKAISDINSAISAESLEMWKTNADKFSNFENKILLKDNLKGSNGSSNVRSEPSNYSFAGYSVDITSSSDATSGWNFAQRKVWTSENQTNGSTDLVQSPTRSTNVSWIYSLSGKGTKYILDFTYYGPSTAHLYFPYKLVNASDVSKLGLEYKLNDVAQATAITFGDG…
NC96	456843	458895	+	49	8	TAAATTATTTCTGAATTAACTGTAAAAACGAACTAAACCCTTTGTTTTTC	GAAGAAGAAGAAGAAGAAGAAGAA	GTTCTTAGGAGTTCGGGGGTTTTCGTTTGGTCTGATCAGCGAAAATAAAC	VKRKNILKFVSLLGIGSFAMLAAASCTSATTPTPNPTPNPTPNPTPNPEPKPDPMPNPPSGGDMNNPPNGGMNGGDTNPGNGGGMDNSAQQLAAAKTALTNLLNGQNEKVSLYADYAKIKNTLAAAYNTAKTASDNVDATLENLKSARMILQAAIDKAASDKELFDTNNRDLVNAYTQLKTALQTETATLQNLTQVKYSAIKDHVSNLYKIGNQITTKTLDPSSGETSGLEDVRKAISDINSAISAESLEMWKTNADKFSNFENKILLKDNLKGSNGSSNVRSEPSNYSFAGYSVDITSSSDATSGWNFAQRKVWTSENQTNGSTDLVQSPTRSTNVSWIYSLSGKGTKYILDFTYYGPSTAHLYFPYKLVNASDVSKLGLEYKLNDVAQATAITFGDG…
NY01	554651	556703	-	49	9	TAAATTATTTCTGAATTAACTGTAAAAACGAACTAAACCCTTTGTTTTTC	GAAGAAGAAGAAGAAGAAGAAGAAGAA	GTTCTTAGGAGTTCGGGGGTTTTCGTTTGGTCTGATCAGCGAAAATAAAC	VKRKNILKFVSLLGIGSFAMLAAASCTSATTPTPNPTPNPTPNPTPNPEPKPDPMPNPPSGGDMNNPPNGGMNGGDTNPGNGGGMDNSAQQLAAAKTALTNLLNGQNEKVSLYADYAKIKNTLAAAYNTAKTASDNVDATLENLKSARMILQAAIDKAASDKELFDTNNRDLVNAYTQLKTALQTETATLQNLTQVKYSAIKDHVSNLYKIGNQITTKTLDPSSGETSGLEDVRKAISDINSAISAESLEMWKTNADKFSNFENKILLKDNLKGSNGSSNVRSEPSNYSFAGYSVDITSSSDATSGWNFAQRKVWTSENQTNGSTDLVQSPTRSTNVSWIYSLSGKGTKYILDFTYYGPSTAHLYFPYKLVNASDVSKLGLEYKLNDVAQATAITFGDG…
CA06	449009	451103	+	50	18	ATTGAGTTGTTGTATTTAATATATAAAATAGCTAAAATCCTTTAAAAATC	GAAGAAGAAGAAGAAGAAGAAGAAGAAGAAGAAGAAGAAGAAGAAGAAGAAGAA	GTTCTTAGAAGTTTAGGAGTTAGCGACTGCTCTGATCAGCGAAAATAAAT	VKRKNILKFVSLLGIGSFVMLAAASCTSTTTPTPNPEPKPTPNPESKPDPMPNPPSGGMMGGNTNPGNGGGMDNSAQQLAAAKKELSDLLATQSSNLAKYADYTNIQNTLTAAYTTAKSTSDNTSVTLEQVKSATSTLQAAIDTAASSKTSFDEKNPELIKAYYALKETLKNEETVLSGLTDSNFATIKTNLTALYQSGKDIVTKTLDPLMGAAINLSAVSQANTNISNAVSKLETWKTNATVLATSFVKEVLVKNKLTGIDTTNNQEQPGNYSFVGYSVNVTTGSDNARPNWSFAQRKVWTSNTDILSQPQPAEGENQQSAPDVSWIYNLTGMGAKYSLTFNYYGPSTGFLYFPYKLVNSSDSDKVALEYKLNESTVKTIDFAPSQTSPVASDATREN…
NC96	454447	456541	+	50	8	ATTGAGTTGTTGTATTTAATATATAAAATAGCTAAAATCCTTTAAAAATC	GAAGAAGAAGAAGAAGAAGAAGAA	GTTCTTAGAAGTTTAGGAGTTAGCGACTGCTCTGATCAGCGAAAATAAAT	VKRKNILKFVSLLGIGSFVMLAAASCTSTTTPTPNPEPKPTPNPESKPDPMPNPPSGGMMGGNTNPGNGGGMDNSAQQLAAAKKELSDLLATQSSNLAKYADYTNIQNTLTAAYTTAKSTSDNTSVTLEQVKSATSTLQAAIDTAASSKTSFDEKNPELIKAYYALKETLKNEETVLSGLTDSNFATIKTNLTALYQSGKDIVTKTLDPLMGAAINLSAVSQANTNISNAVSKLETWKTNATVLATSFVKEVLVKNKLTGIDTTNNQEQPGNYSFVGYSVNVTTGSDNARPNWSFAQRKVWTSNTDILSQPQPAEGENQQSAPDVSWIYNLTGMGAKYSLTFNYYGPSTGFLYFPYKLVNSSDSDKVALEYKLNESTVKTIDFAPSQTSPVASDATREN…
NY01	557008	559102	-	50	18	ATTGAGTTGTTGTATTTAATATATAAAATAGCTAAAATCCTTTAAAAATC	GAAGAAGAAGAAGAAGAAGAAGAAGAAGAAGAAGAAGAAGAAGAAGAAGAAGAA	GTTCTTAGAAGTTTAGGAGTTAGCGACTGCTCTGATCAGCGAAAATAAAT	VKRKNILKFVSLLGIGSFVMLAAASCTSTTTPTPNPEPKPTPNPESKPDPMPNPPSGGMMGGNTNPGNGGGMDNSAQQLAAAKKELSDLLATQSSNLAKYADYTNIQNTLTAAYTTAKSTSDNTSVTLEQVKSATSTLQAAIDTAASSKTSFDEKNPELIKAYYALKETLKNEETVLSGLTDSNFATIKTNLTALYQSGKDIVTKTLDPLMGAAINLSAVSQANTNISNAVSKLETWKTNATVLATSFVKEVLVKNKLTGIDTTNNQEQPGNYSFVGYSVNVTTGSDNARPNWSFAQRKVWTSNTDILSQPQPAEGENQQSAPDVSWIYNLTGMGAKYSLTFNYYGPSTGFLYFPYKLVNSSDSDKVALEYKLNESTVKTIDFAPSQTSPVASDATREN…
S6	462439	464548	+	50	22	ATAAATTATTTCTGAACTAACTTTAAAAACATACAAAACCTTTATTTAGC	GAAGAAGAAGAAGAAGAAGAAGAAGAAGAAGAAGAAGAAGAAGAAGAGGAAGAGGAAGAAGAAGAA	GTTCTTAGGAGTTCTGGGGTTTGGGGCTGGTTTGATCGGAGAAAATAAAC	VKRKNILKFVSLLGIGSFVMLAAASCTTPVNPTPKPKPNPEPKPNPAPKPDPMPNPGGGMMGGMNGGNTNPGNGGGTDNAAQQLAAAKKELSDLLATQNSNLSTYADYANIQNTLTAAYTTAKSTSDNTSATLEQVKSATSTLQTAIDTAASSKTSFDEKNPELIKAYNALKETLKNEETVLSGLTDSNFATIKTNLTALYQSGKDIVTKTLDPLMGTAINLSAVSQANTNISNAVSKLETWKTNATVLATSFVKEVLVKNKLTGIDTTNNQEQPGNYSFVGYSVDVTTGSDNARPNWSFAQRKVWTSNTDILSQPQPAEGENQQSAPDVSWIYNLTGMGAKYSLTFNYYGPSTGFLYFPYKLVNSSDSDKVALEYKLNESAVKTIDFAPSQTSPVASD…
CA06	441568	443908	+	51	9	TAAAGATGTGCGGTTTTAACTATAAAAACTAATAAAACTCTTTGTTTTTA	GAAGAAGAAGAAGAAGAAGAAGAAGAA	GTTCTTAGGAGTTCTGGGGTTTTCGTTTGGTCTGATCGGCGAAAATAAAC	LVWSAKINPIYYLLNFIHSFLMNIFLSKFINLTLSEEKNILKFVSLLGIGSFVMVAAASCTSATTPTPNPTPTPNPEPNPMPNPGGGGGMSDGNTNPGNGGGMDNSVQQLAAAKTALTTLLNGQTEKVGLYNDYAKIKYDLVKAYTAAKVVLDNTASTTQNLKNAETSLQAAISNAVSSKKRFDQQNNALVTAYNQLKTTLSSETATLVKVMDPKFARIKEHLASLYEAGKMYTSKPLEGMDGVALDAQKVVEANTKLQEATKEEVLRQQKQNATDLQDNFAKQAINKTNITGTNQMGEQPGNYSFAGYSLDLNTTTTGTGNTTQVTASGTDLPNWNFAKRIVWTNTGGNNLPLAYESQNSVPLTDVSWIYSLSGTNAKYTLTFDYYGASSNGYLYFPY…
NC96	447141	449379	+	51	9	TAAAGATGTGCGGTTTTAACTATAAAAACTAATAAAACTCTTTGTTTTTA	GAAGAAGAAGAAGAAGAAGAAGAAGAA	GTTCTTAGGAGTTCTGGGGTTTTCGTTTGGTCTGATCGGCGAAAATAAAC	VKKKNILKFVSLLGIGSFVMVAAASCTSATTPTPNPTPTPNPEPNPMPNPGGGGGMSDGNTNPGNGGGMDNSVQQLAAAKTALTTLLNGQTEKVGLYNDYAKIKYDLVKAYTAAKVVLDNTASTTQNLKNAETSLQAAISNAVSSKKRFDQQNNALVTAYNQLKTTLSSETATLVKVMDPKFARIKEHLASLYEAGKMYTSKPLEGMDGVALDAQKVVEANTKLQEATKEEVLRQQKQNATDLQDNFAKQAINKTNITGTNQMGEQPGNYSFAGYSLDLNTTTTGTGNTTQVTASGTDLPNWNFAKRIVWTNTGGNNLPLAYESQNSVPLTDVSWIYSLSGTNAKYTLTFDYYGASSNGYLYFPYKLVKSGEKAGLQYSLNGASAKEIQFKTATETQPA…
MC06	556715	558794	-	52	11	TAAGTAGTTGTAAGTACGATAAAAACAAGGTAAAACCTTTTGTTTTCCAA	GAAGAAGAAGAAGAAGAAGAAGAAGAAGAAGAA	GTTCTTAGAAGTTTTGGGGCTTTCGGCTGAACTAATCAGCGAAAATTAAG	VKRKNILKFVSLLGIGSFVMLAAASCTSATTPTPNPEPKPTPNPEPKPDPMPNPPSGGNMNGGDTNPGNGGGMDNSAQQLAAAKTALTTLLNGQTEKVGLYNDYAKIKDDLVKAYTAAKEISDKSDANLQEVNNAKTRLETAITTAASSKTSFDEKNPELIKAYNALKETLKNEKSNLDSVMTAEFAAIKNNLDSLYQTAKTLVEGTLQPKMGNSPQVEVINQANTNISNAVSKLDGWKTNANTLATSFVKEVLVKNKLTGIDTTNNQEQPGNYSFVGYSVDVTTGSDNARPNWSFAQRKVWSDNTVILSQPQPAEGENQQSAPDVSWIYNLTGMGAKYSLTFNYYGPSTGFLYFPYKLVNSSDSDKVALEYKLNESTVKTIDFAPSQTSPVASDATRE…
W101	767449	769519	-	52	10	TAAATTATTTCTGAATCAACTGTAAAAACGAATGAAACCCTTTGTTTTTC	GAAGAAGAAGAAGAAGAAGAAGAAGAAGAA	GTTCTTAGAAGTTCTGTGGTCTGGGGTTGGTTTGATCAGCGAAAATAAAC	VKRKNILKFVSLLGIGSFVMLAAASCTSATTPTPNPEPTPNPEPKPDPMPNPPSGGMNGGDTNPGNGGGMDNSAQQLAAAKTALTTLLNTKSEKVGLYSDYAKIKDDLVKAYTAAKEISDKSDATLQEVNNAKTTLETAITTAASSKTSFDEKNPELIKAYNALKETLKNEETVLGGLTDSNFATIKTNLTALYKSGKDIVTKTLDPIMGTAIDLSAVTQANTNISNATSKLEDWKTNANTLATSFVKEVLVKNKLTGIDTTNNQEQPGNYSFVGYSVDVTTGSNNARPNWSFAQRKVWSDNTVILSQPQPAEGENQQSAPDVSWIYNLTGMGAKYSLTFNYYGPSTGFLYFPYKLVNISDSDKVALEYKLNEATAKTIDFAPSQTLPVASDATRENNP…
Rlow	739532	740123	-	54	5	TTAAAACTAGACGTAAAACAAATGAAATGCTTGCTGCACTTCAAGATGCT	GAAGAAGAAGAAGAA	GTGGCACAAGAAGAACAAGCTGAAGAAAATGTTGAAGCCACTCCAACTCA	MRPAPSPMGSPKLLGPNQAGHPQHGPRPMNAHPGQPRPQQAGPRPMGAGGSNQPRPMPNGLQNPQGPRPMNPQGDPRPQPAGVRPNSPQNSQPRPMPNKPQGPRPMGAPNPQPGPQQAGPRPMGVGGSNQPRPMPNGLQNPQGPRPMNPQGDPRPQPAGVRPNSPQANQPGRRPTPNNPQGPRPMGPRPNGGPNRA
NY01	559440	561525	-	55	13	AAAACATTTCTCTGAATTTGTTATAAAAATTAGTGAAACCCTTGATTTTC	GAAGAAGAAGAAGAAGAAGAAGAAGAAGAAGAAGAAGAA	GTTCTTAGAAGTTCTGTGGTCTGGGGTTGGTTTGATCAGCGAAAATAAAC	VKRKNILKFVSLLGIGSFVMLAAASCTTPVSPTPNPTPNPTPNPTPNPTPNPQPKPDPMPNPGGGMMGGNTNPGNGGGTDNAAQQLAEAKAALTTLLNTKSEKVGLYSDYANIQDTLVKAYTAAKEISDKSDATLQEVNNAKTTLETAITTAASSKTSFDEKNPELIKAYNALKETLKNEKSNLDLVMDAEFAAIKNNLDSLYQTAKTFVEGTLQPKMGNIPQVEAVNQANQAIVNATQMLETRKNNASTLNTSFLKETLKSASLSAATGDGAATVQQQPGDYSFVAYASDITSPNWNFAQRTVWTADNKLVTSPLPNNSQNSAPLTDVSWIYTLSGTGAKYTLTFDYYGPQTGYLYFPYKLVKDADKNNIGLQYKLNDGNFEQINFAPAQPVEAGPAE…
NY01	564228	566340	-	56	14	ATTGAGTTGTTGTATTTAATATATAAAATAGCTAAAATCCTTTAAAAATC	GAAGAAGAAGAAGAAGAAGAAGAAGAAGAAGAAGAAGAAGAA	GTTCTTAGAAGTTTAGGAGTTAGCGACTGCTCTGATCGGCGAAAATAAAT	VKRKNILKFVSLLGIGSFVMLAAASCTSATTPTPNPEPKPTPNPEPNPMPNPGGGDMNNPPSGGMNGGDTNPGNDGGMDNATQQLAAAKKELSDLLATQNSNLASYADYAKIQNTLTSAYTTAKSTSDNTSATLEQVKSATSTLQTAIDAAASEKKTFDAANPELIKFYNNLKTELQSKTTNLESLNDPQYSGIKDNLNSLYNSASEIVNKTLIPATGNDLMRTDVEKVNTELMGAVSLLAARKTSAENLFSAFDKNVLVKTNLTAGNGSQVANDQPGNYSFVAFSVNAVTASDNLPNWNFAQRRVWDSATAPLATTTTENGAQPEPALTDVSWIYNLTGTGAKYSFTFNYFGPRTGYLYFPYKLVNSSQSDKVGLQYKLNEGSVQAITFAPTTPASAV…
S6	569986	572158	-	58	18	TAAATTATTTCTGAATCAACTGTAAAAACGAACGAAACCCCTTGTTTTTC	GAAGAAGAAGAAGAAGAAGAAGAAGAAGAAGAAGAAGAAGAAGAAGAAGAAGAA	GTTCTTAGGAGTTCTGGGGTTTTCGTTTGGTCTGATCGGGGAAAATAAAC	VKRKNILKFVSLLGIGSFVMLAAASCTKPVNPTPNPTPNPTPNPTPNPTPNPTPNPTPNPTPNPTPNPTPNPTPNPNPEPKPDPMPNPPSGGMNGGDTNPGNGGGMDNSAQQLSAAKTALTNLLNGQTEKVGLYNDYAKIKDDLVKAYTAAKEISDKSDATLQEVNNAKTTLETAITTAASSKTSFDEKNPELIKAYTALKETITSEEMQLNQLKDANFETIKNHISNLYKQGKDIITATLDPTTGDGPQAMVVNQANEAIVNATSKLEDWKTNATNLATRFVKQTLNNANLVNETNNQPQPGNYSFVAYASDITSPNWNFAQRTVWTADNRVWTSPLPNNSQNSAPLTDVSWIYTLSGTGAKYTLTFDYYGPQTGYLYFPYKLVKDADKNNIGLQYKL…
S6	801732	804117	-	59	6	AAAACATTTCTCTGAATTTGCTATAAAAATTAGTGAAACCTTTTATTTTC	GAAGAAGAAGAAGAAGAA	GTTCTTAGAAGTTTAGTAGTGTGAGTCAACATTTTTAAGCGAAAATAATG	VKRKNILKFISLLGIGSIVTLAVASCRKAVTSNPGNPSNPNTDNPQNPNIGNSGDDAVDIALAAKTEAKTAIDASAELSDSVKEALKRQVEATTTEAVARDLKTKAEALVSTVKALSELITAARAVKEDAQYNSVDATLKTTLEEKYTAAAGFLTEDSKLKNLDASSNLDTTKASLESAKTALDTAVNALMPEFTFAKTKASAVKTASELGPLVNPALKAELQRQVDALTKDHATEATTMLANLTSLKESLESLQTLVSDGLKMQVDYPQKYYDADNKSAFDDALLKASSVFPAFQWTAKSIMVPAPEGDALPNPRAWTKARDKSEFKLQNFVMAPAQAATPTTTQTSPSAIASAIVKVATVTEKTSTMQTAPAAQTPTADLASTVSYLKSLNDTLKAA…
S6	816229	818317	-	60	7	CATTTTACATTTAGTCAAAAAACCGACGAAAGTCTTTGTTTATAAACCAA	GAAGAAGAAGAAGAAGAAGAA	GTTCTTAGAAGTTCAGGAGTGTCGGGTTGAGCTAGTGAGCGAAAATTAAG	VKRKNILKFVSLLGIGSFVMLAAASCTSATTPTPNPEPKPNPEPKPDPMPNPPSGGNMNGGDTNPGNGGGMDNAVQQLAAAKTALTTLLNGQTEKVGLYNDYAKIKDDLVKAYIAAKEISDKSHATLQEVNNAKTRLETAIKDAANSKTSFGEKNPELIKAYDALKQTITSEEMSLNQLMDANFETIKNHISNLYKQGKDIITATLDPTTGDGPQAMVVNQTNEAIVNATSKLEDWKTNATNLATRFVKQTLNNANLVNETNNQPQPGSYSFVAYSVDLNTGVSTASNTPNWNFAQRKVWVSGSGGRTSPFSSSDANNSPALTDVSWIYNLSGANSKYTLTFNWYGPSTGHLYFPYKLVKSDDAQNVGLQYTLNNKPAQRIEFAPAQSPSSGGTAHASD…
VA94	779726	781823	-	61	6	AAAACATTTCTCTGAATTTGCTATAAAAATTAGTGAAACCTTTGGTTTGC	GAAGAAGAAGAAGAAGAA	GTTCTTAGGAGTTCTGGAGCTTTGGTTTGGCTTGATGAGCGAAAATAAAT	VKRKNILKFVSLLGIGSFVMLAAASCTTATTPTPNPEPNPTPNPEPTPTPNPTPPSNGGGMNGGDTNPGNGGGTDNAAQQLSTAKTALTNLLNGQTEKVVLYNDYAKIKDQLVKAYIAAKEISDKSDATLQEINNAKTTLETAITTAANLKTSFDEKNPELIKAYNALKETIISEEMSLKQLTGANFETIKNHISNLYKQGKDIITATLDPITGDGPQAMVVNQANEAIVNATSKLEDWKTNATNLATRFVKQTLNNANLVNETNNQPQPGNYSFVAYSVDLNTGISTASNTPNWNFAQRKVWVSGSGGRTSPFSSSDANNSPALTDVSWIYNLSGANSKYTLTFN
VA94	797027	799074	-	62	9	ATTGAGTTGTTGTATCTAATATATAAAATAGCTAAAATCCTTTAAAAATC	GAAGAAGAAGAAGAAGAAGAAGAAGAA	CTTAGAAGTTTAGAGGTTTGGGGCTCGTCTGATCGACGAAAATAAACACG	VKRKNILKFVSLLGIGSFVMLAAASCTSATTPTPNPEPKPNPEPKPDPMPNPPSGGNMNGGDTNPGNGGGMDNAVQQLAAAKTALTTLLNGQTEKVGLYNDYAKIKDDLVKAYIAAKEISDKSHATLQEVNNAKTRLETAIKDAANSKTSFDEKNPELIKAYDALKQTITSEEMSLNQLMDANFETIKNHISNLYKQGKDIITATLDPTTGDGPQAMVVNQTNETIVNATSKLEDWKTNATNLATRFVKQTLNNANLVNETNNQQQPGNYSFVAYASDIASPNWNFAQRTVWTADNNLVTSPLPNNSQNSAPLTDVSWIYTLSGTGAKYTLTFDYYGPQTGYLYFPYKLVKDADKNNIGLQYKLNDGNFEQINFAPAPTEPARSTMPQTAPENQTSGEN…
NC08	551762	553841	-	63	8	TAAGTAGTTGTAAGTACGATAAAAACAAGGTAAAACCTTTTGTTTTCCAA	GAAGAAGAAGAAGAAGAAGAAGAA	GTTCTTAGAAGTTTTGGGGCTTTCGGCTGAACTAATCAGCGAAAATTAAG	VKRKNILKFVSLLGIGSFVMLAAASCTSATTPTPNPEPKPTPNPEPKPDPMPNPPSGGNMNGGDTNPGNGGGMDNSAQQLAAAKTALTTLLNGQTEKVGLYNDYAKIKDDLVKAYTAAKEISDKSDANLQEVNNAKTRLETAITTAASSKTSFDEKNPELIKAYNALKETLKNEKSNLDSVMTAEFAAIKNNLDSLYQTAKTLVEGTLQPKMGNSPQVEVINQANTNISNAVLKLDGWKTNANTLATSFVKEVLVKNKLTGIDTTNNQEQPGNYSFVGYSVDVTTGSNNARPNWSFAQRKVWSDNTVILSQPQPAEGENQQSAPDVSWIYNLTGMGAKYSLTFNYYGPSTGFLYFPYKLVNISDSDKVALEYKLNEATAKTIDFAPSQTLPVASDATRE…
NC08	775261	777337	-	64	4	TATTATTCACTGGTATTAAGTTGAAAAATAAGTAAAAGCCTTTGTTTTTC	GAAGAAGAAGAA	GATTTTAGAAGTTCTTAAGTTTGGGCCCCGTCTGATCAGCGAAAATAAAC	VKRKNILKFVSLLGIGSFVMLAAASCTSATTPTPNPEPKPTPNPEPKPDPMPNPPSGGMNGGNTNPGNGGRMDNAAQQLVAARTALTTLINSRTQNTELYVDYAKIQDTLVKAYDAAKVVLDNTASTTQNINQAKTTLETAINAAAKARRDFDAANGPLVTAYNALKETLKNEETVLSGLTDSNFATIKTKLTALYQSGKDIVTKTLDPIMGTAIDLSAVTQANTNISNAVLKLDGWKTNANTLATSFVKEVLVKNKLTGIDTTNNQEQPGNYSFVGYSVDVTTGSNNARPNWSFAQRKVWSDNTVILSQPQPAEGENQQSAPDVSWIYNLTGMGAKYSLTFNYYGPSTGFLYFPYKLVNISDSDKVALEYKLNEATAKTIDFAPSQTLPVASDATREN…
